# Supplementary material for: Regioselective 5-exo-dig (halo)cyclization of N-propargyloxycarbonyl guanidine derivatives under mild conditions
Source: Royal Society of Chemistry journal article supplement (doi:10.1039/d4ob00579a), 2024-01-01
Supplement: d4ob00579a1.pdf [file d4ob00579a1.pdf]

## Supporting Information

# Regioselective *5-exo-dig* (halo)cyclization of *N*-propargyloxycarbonyl guanidine derivatives under mild condition

Bohong Lin, Yaoping Ruan, Qi Hou, Zhijun Yuan, Yunshi Liang, Jing Zhang\*

Artemisinin Research Center and The First Affiliated Hospital, Guangzhou University of Chinese Medicine, 12 Jichang Road, Guangzhou 510405, China.

Email: [jingzhang@gzucm.edu.cn](mailto:jingzhang@gzucm.edu.cn)

## Table of Contents

|                                                                |     |
|----------------------------------------------------------------|-----|
| <b>1. Methods and materials</b> .....                          | S2  |
| <b>2. X-ray crystal structure analysis</b> .....               | S2  |
| 2.1. Crystallographic Information for Compound <b>3a</b> ..... | S2  |
| 2.2. Crystallographic Information for Compound <b>3i</b> ..... | S3  |
| 2.3. Crystallographic Information for Compound <b>4m</b> ..... | S4  |
| 2.4. Crystallographic Information for Compound <b>5b</b> ..... | S6  |
| 2.5. Crystallographic Information for Compound <b>6g</b> ..... | S7  |
| <b>3. Compound Synthesis</b> .....                             | S9  |
| 3.1. Synthesis of Compound <b>2</b> .....                      | S9  |
| 3.2. Synthesis of Compounds <b>3a-3m</b> .....                 | S9  |
| 3.3. Synthesis of Compounds <b>4a-4m</b> .....                 | S13 |
| 3.4. Synthesis of Compounds <b>5a-5e</b> .....                 | S18 |
| 3.5. Synthesis of Compounds <b>6a-6g</b> .....                 | S20 |
| <b>4. NMR spectra</b> .....                                    | S24 |

## 1. Methods and materials

All chemicals were used as received unless otherwise stated.  $^1\text{H}$  NMR and  $^{13}\text{C}$  NMR spectra were collected on Bruker AVANCE III HD400. Proton chemical shifts of NMR spectra were calibrated with TMS as internal reference. HRMS spectral data were recorded on Agilent 7250 and JEOL-JMS-T100LP AccuTOF devices. Analytical thin-layer chromatography (TLC) analysis was performed on TLC silica gel plates ( $0.2 \pm 0.03$  mm) and visualized with ultraviolet light (254 nm) to monitor the reaction progression.

## 2. X-ray crystal structure analysis

### Procedure

The single crystals of compounds **3a**, **3i**, **4m**, **5b** and **6g** were obtained by slow evaporation of their solution in DCM/PE (2:5), DCM/PE (3:10), Et<sub>2</sub>O/DCM/PE (1:2:20), MeOH/PE (1:5) and Et<sub>2</sub>O/DCM/PE (5:3:10) at room temperature, respectively. The X-ray crystallographic data were collected on Bruker D8 VENTURE METALJET Ga-Target SC-XRD, and deposited in Cambridge Crystallographic Data Centre (CCDC) with deposition numbers of 2251361, 2251367, 2251362, 2251368 and 2251364, respectively. These data can be obtained free of charge from CCDC via <https://www.ccdc.cam.ac.uk/structures/>

### 2.1. Crystallographic Information for Compound 3a

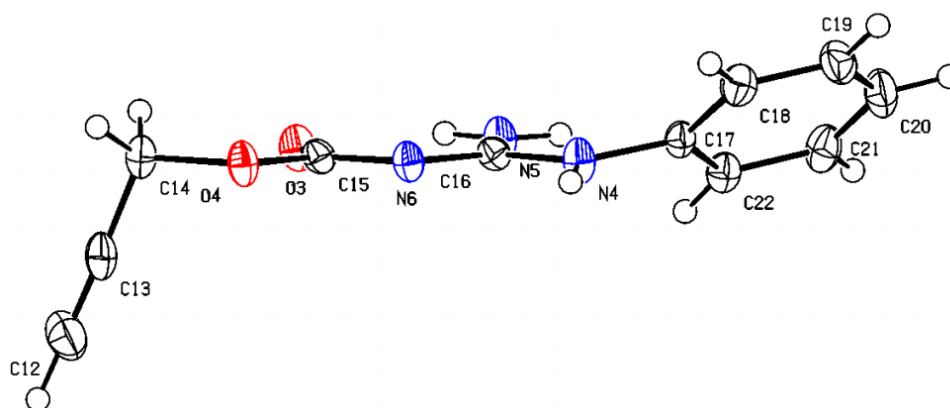

Figure S1. ORTEP of **3a** (at 50% level).

Table S1 Crystal data and structure refinement for compound **3a** (CDCC2251361).

|                     |                                                  |
|---------------------|--------------------------------------------------|
| Identification code | <b>3a</b>                                        |
| Empirical formula   | $\text{C}_{11}\text{H}_{11}\text{N}_3\text{O}_2$ |
| Formula weight      | 217.23                                           |
| Temperature/K       | 298.00                                           |
| Crystal system      | triclinic                                        |
| Space group         | P-1                                              |
| a/Å                 | 8.7766(8)                                        |
| b/Å                 | 9.6982(9)                                        |

|                                               |                                                               |
|-----------------------------------------------|---------------------------------------------------------------|
| $c/\text{\AA}$                                | 13.2431(13)                                                   |
| $\alpha/^\circ$                               | 99.818(4)                                                     |
| $\beta/^\circ$                                | 98.950(4)                                                     |
| $\gamma/^\circ$                               | 101.433(4)                                                    |
| Volume/ $\text{\AA}^3$                        | 1067.53(18)                                                   |
| $Z$                                           | 4                                                             |
| $\rho_{\text{calc}}/\text{g/cm}^3$            | 1.352                                                         |
| $\mu/\text{mm}^{-1}$                          | 0.096                                                         |
| $F(000)$                                      | 456.0                                                         |
| Crystal size/ $\text{mm}^3$                   | $0.15 \times 0.12 \times 0.1$                                 |
| Radiation                                     | MoK $\alpha$ ( $\lambda = 0.71073$ )                          |
| $2\Theta$ range for data collection/ $^\circ$ | 4.38 to 54.98                                                 |
| Index ranges                                  | $-11 \leq h \leq 10, -12 \leq k \leq 12, -17 \leq l \leq 17$  |
| Reflections collected                         | 14132                                                         |
| Independent reflections                       | 4746 [ $R_{\text{int}} = 0.0493, R_{\text{sigma}} = 0.0524$ ] |
| Data/restraints/parameters                    | 4746/0/289                                                    |
| Goodness-of-fit on $F^2$                      | 1.076                                                         |
| Final R indexes [ $I \geq 2\sigma(I)$ ]       | $R_1 = 0.0442, wR_2 = 0.1135$                                 |
| Final R indexes [all data]                    | $R_1 = 0.0589, wR_2 = 0.1217$                                 |
| Largest diff. peak/hole / $e \text{\AA}^{-3}$ | 0.36/-0.32                                                    |

## 2.2. Crystallographic Information for Compound **3i**

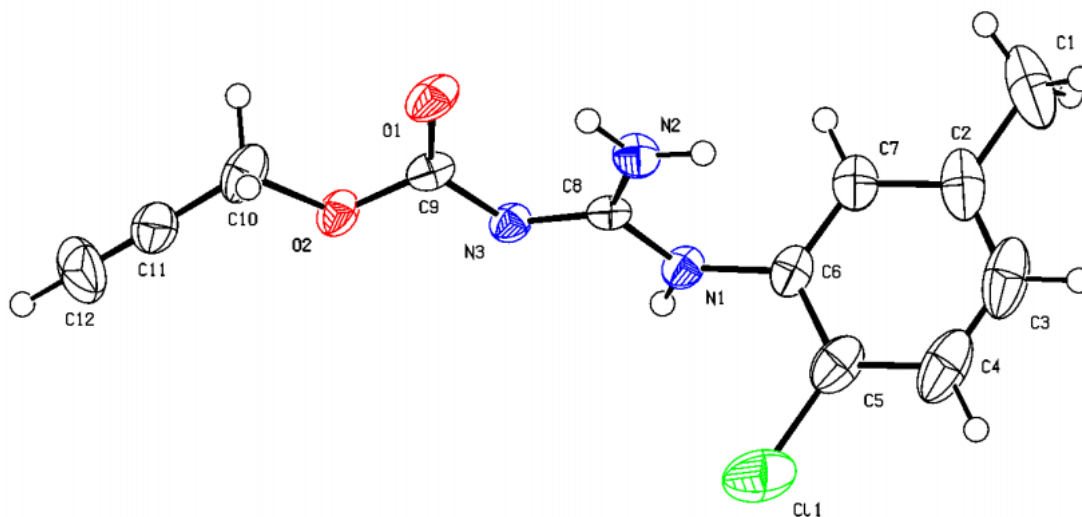

**Figure S2.** ORTEP of **3i** (at 50% level).

**Table S2** Crystal data and structure refinement for compound **3i** (CDCC2251367).

Identification code                      **3i**

|                                             |                                                                 |
|---------------------------------------------|-----------------------------------------------------------------|
| Empirical formula                           | C <sub>12</sub> H <sub>13</sub> ClN <sub>3</sub> O <sub>2</sub> |
| Formula weight                              | 266.70                                                          |
| Temperature/K                               | 150.00                                                          |
| Crystal system                              | tetragonal                                                      |
| Space group                                 | P4 <sub>1</sub> 2 <sub>1</sub> 2                                |
| a/Å                                         | 9.38970(10)                                                     |
| b/Å                                         | 9.38970(10)                                                     |
| c/Å                                         | 28.9002(6)                                                      |
| α/°                                         | 90                                                              |
| β/°                                         | 90                                                              |
| γ/°                                         | 90                                                              |
| Volume/Å <sup>3</sup>                       | 2548.03(8)                                                      |
| Z                                           | 8                                                               |
| ρ <sub>calc</sub> /cm <sup>3</sup>          | 1.390                                                           |
| μ/mm <sup>-1</sup>                          | 0.298                                                           |
| F(000)                                      | 1112.0                                                          |
| Crystal size/mm <sup>3</sup>                | ? × ? × ?                                                       |
| Radiation                                   | MoKα (λ = 0.71073)                                              |
| 2θ range for data collection/°              | 4.562 to 54.874                                                 |
| Index ranges                                | -12 ≤ h ≤ 12, -11 ≤ k ≤ 11, -24 ≤ l ≤ 36                        |
| Reflections collected                       | 23658                                                           |
| Independent reflections                     | 2838 [R <sub>int</sub> = 0.0579, R <sub>sigma</sub> = 0.0283]   |
| Data/restraints/parameters                  | 2838/0/164                                                      |
| Goodness-of-fit on F <sup>2</sup>           | 1.064                                                           |
| Final R indexes [I ≥ 2σ (I)]                | R <sub>1</sub> = 0.0441, wR <sub>2</sub> = 0.1101               |
| Final R indexes [all data]                  | R <sub>1</sub> = 0.0499, wR <sub>2</sub> = 0.1133               |
| Largest diff. peak/hole / e Å <sup>-3</sup> | 0.14/-0.57                                                      |
| Flack parameter                             | -0.95(4)                                                        |

### 2.3. Crystallographic Information for Compound 4m

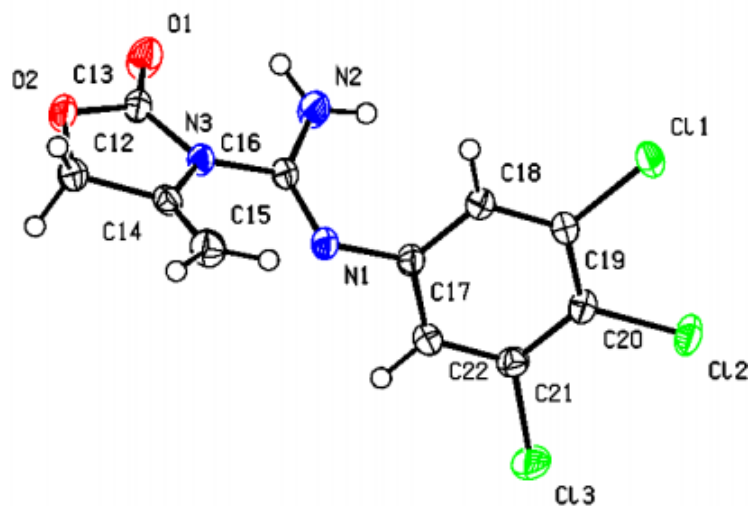

**Figure S3.** ORTEP of **4m** (at 50% level).

**Table S3** Crystal data and structure refinement for compound **4m** (CDCC2251362).

|                                                |                                            |
|------------------------------------------------|--------------------------------------------|
| Identification code                            | <b>4m</b>                                  |
| Empirical formula                              | $C_{11}H_8Cl_3N_3O_2$                      |
| Formula weight                                 | 320.55                                     |
| Temperature/K                                  | 200.00                                     |
| Crystal system                                 | triclinic                                  |
| Space group                                    | P-1                                        |
| a/Å                                            | 7.5748(3)                                  |
| b/Å                                            | 12.5331(4)                                 |
| c/Å                                            | 13.9255(5)                                 |
| $\alpha/^\circ$                                | 91.8130(10)                                |
| $\beta/^\circ$                                 | 97.6170(10)                                |
| $\gamma/^\circ$                                | 102.8260(10)                               |
| Volume/Å <sup>3</sup>                          | 1275.11(8)                                 |
| Z                                              | 4                                          |
| $\rho_{\text{calc}}/\text{cm}^3$               | 1.670                                      |
| $\mu/\text{mm}^{-1}$                           | 0.718                                      |
| F(000)                                         | 648.0                                      |
| Crystal size/mm <sup>3</sup>                   | ? × ? × ?                                  |
| Radiation                                      | MoK $\alpha$ ( $\lambda = 0.71073$ )       |
| 2 $\theta$ range for data collection/ $^\circ$ | 2.956 to 59.21                             |
| Index ranges                                   | -10 ≤ h ≤ 9, -17 ≤ k ≤ 17, -19<br>≤ l ≤ 19 |
| Reflections collected                          | 20912                                      |

|                                                |                                                                  |
|------------------------------------------------|------------------------------------------------------------------|
| Independent reflections                        | 6864 [ $R_{\text{int}} = 0.0476$ , $R_{\text{sigma}} = 0.0534$ ] |
| Data/restraints/parameters                     | 6864/0/343                                                       |
| Goodness-of-fit on $F^2$                       | 0.991                                                            |
| Final R indexes [ $I \geq 2\sigma(I)$ ]        | $R_1 = 0.0423$ , $wR_2 = 0.1151$                                 |
| Final R indexes [all data]                     | $R_1 = 0.0452$ , $wR_2 = 0.1177$                                 |
| Largest diff. peak/hole / $e \text{ \AA}^{-3}$ | 0.53/-0.50                                                       |

## 2.4. Crystallographic Information for Compound **5b**

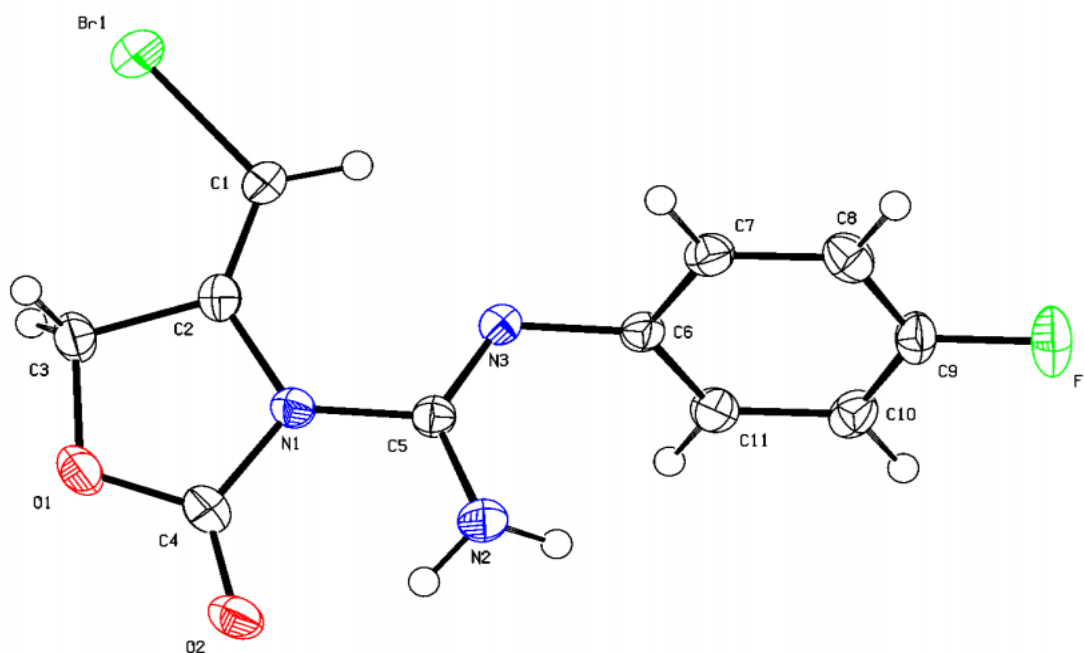

**Figure S4.** ORTEP of **5b** (at 50% level).

**Table S4** Crystal data and structure refinement for compound **5b** (CDCC2251368).

|                        |                      |
|------------------------|----------------------|
| Identification code    | <b>5b</b>            |
| Empirical formula      | $C_{11}H_9BrFN_3O_2$ |
| Formula weight         | 314.12               |
| Temperature/K          | 298.00               |
| Crystal system         | monoclinic           |
| Space group            | $P2_1/c$             |
| $a/\text{\AA}$         | 11.3126(16)          |
| $b/\text{\AA}$         | 6.7487(10)           |
| $c/\text{\AA}$         | 16.077(2)            |
| $\alpha/^\circ$        | 90                   |
| $\beta/^\circ$         | 109.264(5)           |
| $\gamma/^\circ$        | 90                   |
| Volume/ $\text{\AA}^3$ | 1158.7(3)            |

|                                                |                                                               |
|------------------------------------------------|---------------------------------------------------------------|
| Z                                              | 4                                                             |
| $\rho_{\text{calc}}/\text{cm}^3$               | 1.801                                                         |
| $\mu/\text{mm}^{-1}$                           | 3.558                                                         |
| F(000)                                         | 624.0                                                         |
| Crystal size/ $\text{mm}^3$                    | $0.2 \times 0.16 \times 0.12$                                 |
| Radiation                                      | MoK $\alpha$ ( $\lambda = 0.71073$ )                          |
| $2\theta$ range for data collection/ $^\circ$  | 5.368 to 52.744                                               |
| Index ranges                                   | $-14 \leq h \leq 14, -8 \leq k \leq 7, -20 \leq l \leq 14$    |
| Reflections collected                          | 9147                                                          |
| Independent reflections                        | 2340 [ $R_{\text{int}} = 0.0457, R_{\text{sigma}} = 0.0460$ ] |
| Data/restraints/parameters                     | 2340/0/164                                                    |
| Goodness-of-fit on $F^2$                       | 1.131                                                         |
| Final R indexes [ $I \geq 2\sigma(I)$ ]        | $R_1 = 0.0361, wR_2 = 0.1091$                                 |
| Final R indexes [all data]                     | $R_1 = 0.0388, wR_2 = 0.1118$                                 |
| Largest diff. peak/hole / $e \text{ \AA}^{-3}$ | 0.49/-0.77                                                    |

## 2.5. Crystallographic Information for Compound 6g

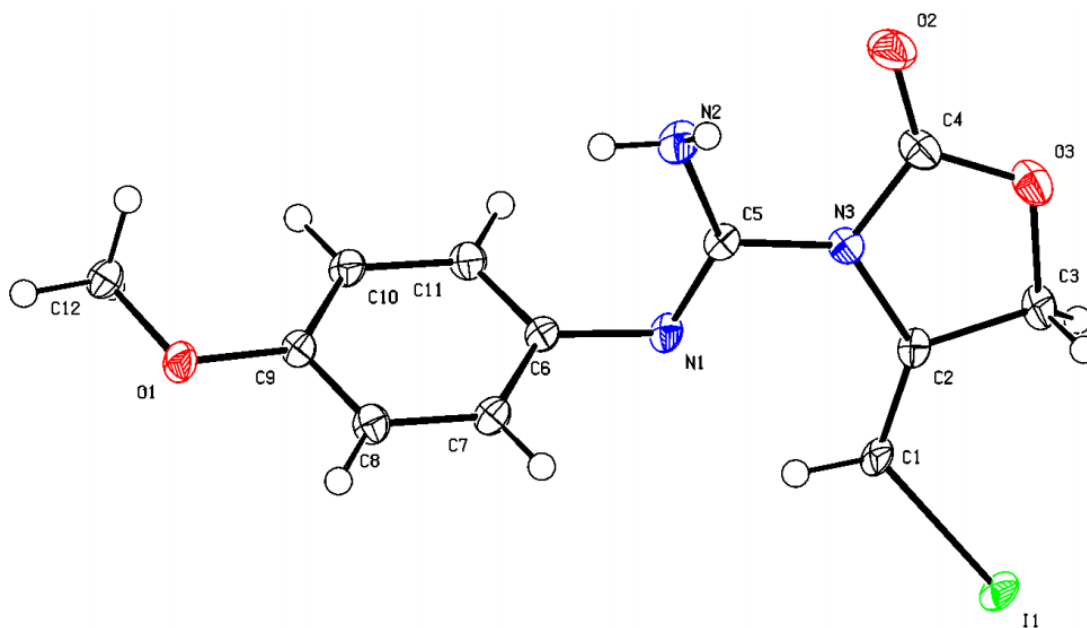

**Figure S5.** ORTEP of **6g** (at 50% level).

**Table S5** Crystal data and structure refinement for compound **6g** (CDCC2251364).

|                     |                                                   |
|---------------------|---------------------------------------------------|
| Identification code | <b>6g</b>                                         |
| Empirical formula   | $\text{C}_{12}\text{H}_{12}\text{IN}_3\text{O}_3$ |
| Formula weight      | 373.15                                            |

|                                             |                                                                   |
|---------------------------------------------|-------------------------------------------------------------------|
| Temperature/K                               | 150.00                                                            |
| Crystal system                              | monoclinic                                                        |
| Space group                                 | P2 <sub>1</sub> /n                                                |
| a/Å                                         | 12.4737(4)                                                        |
| b/Å                                         | 7.2411(2)                                                         |
| c/Å                                         | 15.4718(5)                                                        |
| $\alpha$ /°                                 | 90                                                                |
| $\beta$ /°                                  | 106.0440(10)                                                      |
| $\gamma$ /°                                 | 90                                                                |
| Volume/Å <sup>3</sup>                       | 1343.03(7)                                                        |
| Z                                           | 4                                                                 |
| $\rho_{\text{calc}}$ /cm <sup>3</sup>       | 1.845                                                             |
| $\mu$ /mm <sup>-1</sup>                     | 2.392                                                             |
| F(000)                                      | 728.0                                                             |
| Crystal size/mm <sup>3</sup>                | ? × ? × ?                                                         |
| Radiation                                   | MoK $\alpha$ ( $\lambda$ = 0.71073)                               |
| 2 $\Theta$ range for data collection/°      | 3.728 to 54.962                                                   |
| Index ranges                                | -15 ≤ h ≤ 15, -6 ≤ k ≤ 9, -19<br>≤ l ≤ 19                         |
| Reflections collected                       | 9658                                                              |
| Independent reflections                     | 2930 [ $R_{\text{int}}$ = 0.0619, $R_{\text{sigma}}$ =<br>0.0678] |
| Data/restraints/parameters                  | 2930/253/174                                                      |
| Goodness-of-fit on F <sup>2</sup>           | 1.072                                                             |
| Final R indexes [ $I \geq 2\sigma(I)$ ]     | $R_1$ = 0.0542, $wR_2$ = 0.1479                                   |
| Final R indexes [all data]                  | $R_1$ = 0.0633, $wR_2$ = 0.1549                                   |
| Largest diff. peak/hole / e Å <sup>-3</sup> | 1.43/-2.42                                                        |



### 3. Compound Synthesis

#### 3.1. Synthesis of Compound 2

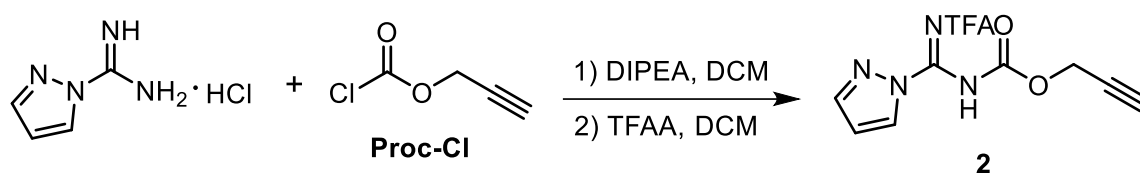

**General procedure:** Compound **2** was synthesized via literature procedure with modifications.<sup>[1]</sup> A solution of 1H-pyrazole-1-carboxamidine hydrochloride (1.0 equiv) and DIPEA (N,N-diisopropylethylamine, 3.0 equiv) in DCM was stirred at room temperature for approximately 20 min. Then **Proc-Cl** (propargyloxycarbonyl chloride, 2.0 equiv) was added in, and it was further stirred for approximately 1 h. The reaction mixture was diluted with DCM, washed with H<sub>2</sub>O and brine, dried over anhydrous Na<sub>2</sub>SO<sub>4</sub>, and concentrated under vacuum. Then, a solution of the obtained condensed crude (1.0 equiv) and TFAA (trifluoroacetic anhydride, 2.0 equiv) in DCM was stirred at room temperature for approximately 30 min. The reaction mixture was diluted with DCM, and washed with H<sub>2</sub>O and brine. After being dried over anhydrous Na<sub>2</sub>SO<sub>4</sub>, the obtained crude was concentrated under vacuum to afford compound **2**. Due to the instability of compound **2** over silica gel, it was used directly in the next step without further purification.

#### 3.2. Synthesis of Compounds 3a-3m

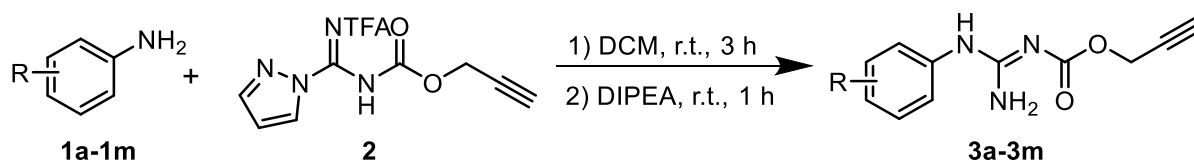

**General procedure:** A solution of aromatic amine **1a–1m** (1.0 equiv) and compound **2** (1.5 equiv) in DCM was stirred at room temperature for approximately 3 h. Then DIPEA (3.0 equiv) was added in, and the mixture was stirred for additional 1 h. The reaction mixture was diluted with DCM, washed with H<sub>2</sub>O and brine, and dried over anhydrous Na<sub>2</sub>SO<sub>4</sub>. The obtained crude was concentrated under vacuum and purified by silica gel column chromatography to afford the target compounds **3a–3m**.

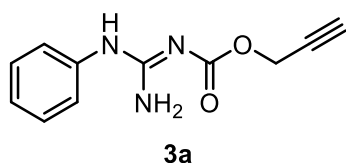

1-Propargyloxycarbonyl-2-phenylguanidine (compound **3a**) was obtained as a white solid after purification through silica gel column chromatography (PE/EtOAc 2:1). <sup>1</sup>H NMR (400 MHz,

CDCl<sub>3</sub>) δ 7.41 (m, 2H), 7.29 (m, 3H), 4.45 (d, *J* = 2.4 Hz, 2H), 2.33 (t, *J* = 2.4 Hz, 1H); <sup>13</sup>C{<sup>1</sup>H} NMR (101 MHz, CDCl<sub>3</sub>) δ 162.9, 160.9, 136.2, 129.8, 127.0, 126.2, 79.1, 73.6, 51.7; HRMS (ESI) *m/z*: [M + H]<sup>+</sup> Calcd for C<sub>11</sub>H<sub>12</sub>N<sub>3</sub>O<sub>2</sub> 218.0924; found 218.0928.

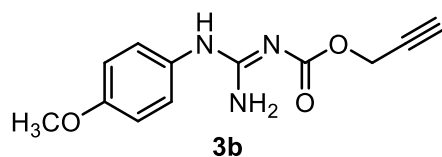

1-Propargyloxycarbonyl-2-(4'-methoxyphenyl)guanidine (compound **3b**) was obtained as a white solid after purification through silica gel column chromatography (PE/EtOAc 1:1). <sup>1</sup>H NMR (400 MHz, CDCl<sub>3</sub>) δ 7.21 (m, 2H), 6.93 (m, 2H), 4.49 (d, *J* = 2.4 Hz, 2H), 3.82 (s, 3H), 2.35 (t, *J* = 2.4 Hz, 1H); <sup>13</sup>C{<sup>1</sup>H} NMR (101 MHz, CDCl<sub>3</sub>) δ 163.0, 161.5, 158.8, 128.3, 128.1, 115.0, 79.2, 73.5, 55.5, 51.8; HRMS (ESI) *m/z*: [M + H]<sup>+</sup> Calcd for C<sub>12</sub>H<sub>14</sub>N<sub>3</sub>O<sub>3</sub> 248.1030; found 248.1026.

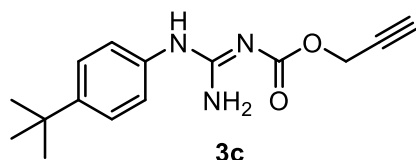

1-Propargyloxycarbonyl-2-(4'-(tert-butyl)phenyl)guanidine (compound **3c**) was obtained as a white solid after purification through silica gel column chromatography (PE/EtOAc 3:1). <sup>1</sup>H NMR (400 MHz, CDCl<sub>3</sub>) δ 7.45 (m, 2H), 7.24 (m, 2H), 4.51 (d, *J* = 2.4 Hz, 2H), 2.36 (t, *J* = 2.4 Hz, 1H), 1.35 (s, 9H); <sup>13</sup>C{<sup>1</sup>H} NMR (101 MHz, CDCl<sub>3</sub>) δ 163.0, 161.1, 150.2, 133.2, 126.7, 125.7, 79.2, 73.5, 51.7, 34.6, 31.3; HRMS (ESI) *m/z*: [M + H]<sup>+</sup> Calcd for C<sub>15</sub>H<sub>20</sub>N<sub>3</sub>O<sub>2</sub> 274.1550; found 274.1548.

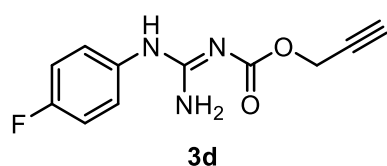

1-Propargyloxycarbonyl-2-(4'-fluorophenyl)guanidine (compound **3d**) was obtained as a white solid after purification through silica gel column chromatography (PE/EtOAc 1:1). <sup>1</sup>H NMR (400 MHz, *d*<sub>6</sub>-DMSO) δ 9.07 (br, 1H), 7.44 (m, 2H), 7.15 (m, 2H), 4.58 (d, *J* = 2.4 Hz, 2H), 3.42 (t, *J* = 2.4 Hz, 1H); <sup>13</sup>C{<sup>1</sup>H} NMR (101 MHz, *d*<sub>6</sub>-DMSO) δ 162.8, 160.1, 158.9 (d, *J* = 241.1 Hz), 135.0 (d, *J* = 2.9 Hz), 124.4 (d, *J* = 8.4 Hz), 115.8 (d, *J* = 22.6 Hz), 80.4, 77.0, 52.1; <sup>19</sup>F NMR (376 MHz, *d*<sub>6</sub>-DMSO) δ -119.31 (s, 1F); HRMS (ESI) *m/z*: [M + H]<sup>+</sup> Calcd for C<sub>11</sub>H<sub>11</sub>FN<sub>3</sub>O<sub>2</sub> 236.0830; found 236.0825.

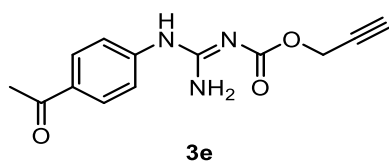

1-Propargyloxycarbonyl-2-(4'-acetylphenyl)guanidine (compound **3e**) was obtained as a white solid after purification through silica gel column chromatography (PE/EtOAc 1:1).  $^1\text{H}$  NMR (400 MHz,  $d_6$ -DMSO)  $\delta$  9.36 (br, 1H), 7.89 (m, 2H), 7.64 (m, 2H), 4.63 (d,  $J = 2.4$  Hz, 2H), 3.43 (t,  $J = 2.8$  Hz, 1H), 2.52 (s, 3H);  $^{13}\text{C}\{^1\text{H}\}$  NMR (101 MHz,  $d_6$ -DMSO)  $\delta$  197.0, 162.6, 159.4, 143.8, 131.7, 129.8, 120.2, 80.3, 77.1, 52.4, 26.9; HRMS (ESI)  $m/z$ :  $[\text{M} + \text{H}]^+$  Calcd for  $\text{C}_{13}\text{H}_{14}\text{N}_3\text{O}_3$  260.1030; found 260.1021.

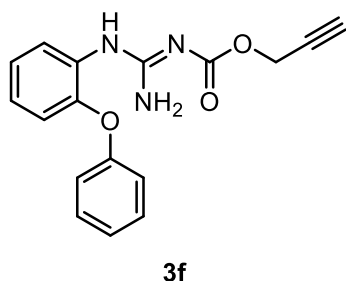

1-Propargyloxycarbonyl-2-(2'-phenoxyphenyl)guanidine (compound **3f**) was obtained as a yellow liquid after purification through silica gel column chromatography (PE/EtOAc 3:1).  $^1\text{H}$  NMR (400 MHz,  $\text{CDCl}_3$ )  $\delta$  7.43 (dd,  $J = 7.6, 4.0$  Hz, 1H), 7.32 (m, 2H), 7.24 (m, 1H), 7.17 (m, 1H), 7.11 (t,  $J = 7.2$  Hz, 1H), 6.98 (m, 3H), 4.55 (d,  $J = 2.4$  Hz, 2H), 2.37 (t,  $J = 2.4$  Hz, 1H);  $^{13}\text{C}\{^1\text{H}\}$  NMR (101 MHz,  $\text{CDCl}_3$ )  $\delta$  162.7, 160.3, 156.4, 151.4, 129.8, 128.0, 127.6, 127.4, 124.2, 123.8, 119.7, 118.6, 79.0, 73.7, 51.9; HRMS (ESI)  $m/z$ :  $[\text{M} + \text{H}]^+$  Calcd for  $\text{C}_{17}\text{H}_{16}\text{N}_3\text{O}_3$  310.1186; found 310.1191.

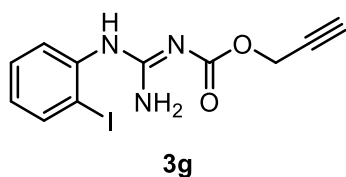

1-Propargyloxycarbonyl-2-(2'-iodophenyl)guanidine (compound **3g**) was obtained as a white solid after purification through silica gel column chromatography (PE/EtOAc 1:1).  $^1\text{H}$  NMR (400 MHz,  $d_6$ -DMSO)  $\delta$  9.02 (br, 1H), 7.88 (d,  $J = 7.6$  Hz, 1H), 7.38 (m, 2H), 6.97 (m, 1H), 4.56 (d,  $J = 2.4$  Hz, 2H), 3.42 (t,  $J = 2.4$  Hz, 1H);  $^{13}\text{C}\{^1\text{H}\}$  NMR (101 MHz,  $d_6$ -DMSO)  $\delta$  161.8, 158.7, 141.0, 139.3, 129.4, 128.1, 127.8, 97.8, 80.2, 77.1, 52.1; HRMS (ESI)  $m/z$ :  $[\text{M} + \text{H}]^+$  Calcd for  $\text{C}_{11}\text{H}_{11}\text{IN}_3\text{O}_2$  343.9890; found 343.9880.

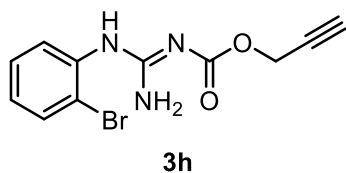

1-Propargyloxycarbonyl-2-(2'-bromophenyl)guanidine (compound **3h**) was obtained as a brown solid after purification through silica gel column chromatography (PE/EtOAc 1:1). <sup>1</sup>H NMR (400 MHz, *d*<sub>6</sub>-DMSO) δ 8.91 (br, 1H), 7.65 (dd, *J* = 8.0, 1.6 Hz, 1H), 7.57 (d, *J* = 8.0 Hz, 1H), 7.36 (m, 1H), 7.11 (m, 1H), 4.57 (d, *J* = 2.4 Hz, 2H), 3.43 (t, *J* = 2.4 Hz, 1H); <sup>13</sup>C{<sup>1</sup>H} NMR (101 MHz, *d*<sub>6</sub>-DMSO) δ 161.9, 159.0, 137.4, 133.1, 128.6, 128.2, 127.1, 119.1, 80.2, 77.1, 52.1; HRMS (ESI) *m/z*: [M + H]<sup>+</sup> Calcd for C<sub>11</sub>H<sub>11</sub>BrN<sub>3</sub>O<sub>2</sub> 296.0029; found 296.0023.

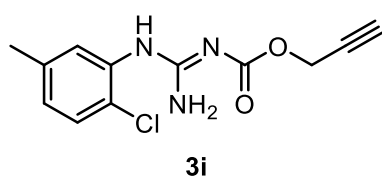

1-Propargyloxycarbonyl-2-(2'-chloro-5'-methylphenyl)guanidine (compound **3i**) was obtained as a white solid after purification through silica gel column chromatography (PE/EtOAc 3:1). <sup>1</sup>H NMR (400 MHz, *d*<sub>6</sub>-DMSO) δ 8.94 (br, 1H), 7.46 (s, 1H), 7.36 (d, *J* = 8.0 Hz, 1H), 7.00 (dd, *J* = 8.0, 2.0 Hz, 1H), 4.58 (d, *J* = 2.4 Hz, 2H), 3.43 (t, *J* = 2.4 Hz, 1H), 2.29 (s, 3H); <sup>13</sup>C{<sup>1</sup>H} NMR (101 MHz, *d*<sub>6</sub>-DMSO) δ 162.0, 159.4, 137.6, 135.4, 129.5, 128.2, 127.4, 125.0, 80.3, 77.1, 52.2, 20.4; HRMS (ESI) *m/z*: [M + H]<sup>+</sup> Calcd for C<sub>12</sub>H<sub>13</sub>ClN<sub>3</sub>O<sub>2</sub> 266.0691; found 266.0687.

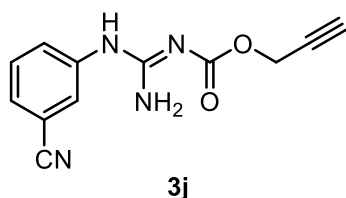

1-Propargyloxycarbonyl-2-(3'-cyanophenyl)guanidine (compound **3j**) was obtained as a white solid after purification through silica gel column chromatography (PE/EtOAc 1:1). <sup>1</sup>H NMR (400 MHz, *d*<sub>6</sub>-DMSO) δ 9.31 (br, 1H), 8.05 (s, 1H), 7.67 (m, 1H), 7.50 (m, 2H), 4.61 (d, *J* = 2.4 Hz, 2H); <sup>13</sup>C{<sup>1</sup>H} NMR (101 MHz, *d*<sub>6</sub>-DMSO) δ 162.5, 159.4, 140.2, 130.5, 127.0, 126.1, 124.3, 119.3, 111.9, 80.3, 77.1, 52.3; HRMS (ESI) *m/z*: [M + H]<sup>+</sup> Calcd for C<sub>12</sub>H<sub>11</sub>N<sub>4</sub>O<sub>2</sub> 243.0877; found 243.0869.

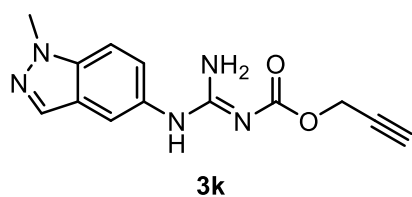

1-Propargyloxycarbonyl-2-(1'-methyl-1H-indazol-5'-yl)guanidine (compound **3k**) was

obtained as a white solid after purification through silica gel column chromatography (EtOAc).  $^1\text{H}$  NMR (400 MHz,  $d_6$ -DMSO)  $\delta$  9.15 (br, 1H), 8.01 (s, 1H), 7.79 (d,  $J = 2.0$  Hz, 1H), 7.60 (d,  $J = 9.2$  Hz, 1H), 7.31 (dd,  $J = 8.8, 2.0$  Hz, 1H), 4.57 (d,  $J = 2.4$  Hz, 2H), 4.03 (s, 3H), 3.41 (t,  $J = 2.4$  Hz, 1H);  $^{13}\text{C}\{^1\text{H}\}$  NMR (101 MHz,  $d_6$ -DMSO)  $\delta$  162.5, 160.7, 137.8, 132.7, 131.1, 124.0, 123.9, 114.7, 110.4, 80.6, 76.9, 52.0, 35.9; HRMS (ESI)  $m/z$ :  $[\text{M} + \text{H}]^+$  Calcd for  $\text{C}_{13}\text{H}_{14}\text{N}_5\text{O}_2$  272.1142; found 272.1133.

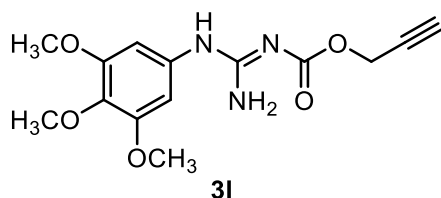

1-Propargyloxycarbonyl-2-(3',4',5'-trimethoxyphenyl)guanidine (compound **3l**) was obtained as a white solid after purification through silica gel column chromatography (PE/EtOAc 1:1).  $^1\text{H}$  NMR (400 MHz,  $d_6$ -DMSO)  $\delta$  9.17 (br, 1H), 6.70 (s, 2H), 4.60 (d,  $J = 2.4$  Hz, 2H), 3.76 (s, 6H), 3.64 (s, 3H), 3.40 (t,  $J = 2.4$  Hz, 1H);  $^{13}\text{C}\{^1\text{H}\}$  NMR (101 MHz,  $d_6$ -DMSO)  $\delta$  162.8, 160.1, 153.3, 134.7, 134.2, 100.9, 80.5, 76.9, 60.5, 56.3, 52.2; HRMS (ESI)  $m/z$ :  $[\text{M} + \text{H}]^+$  Calcd for  $\text{C}_{14}\text{H}_{18}\text{N}_3\text{O}_5$  308.1241; found 308.1249.

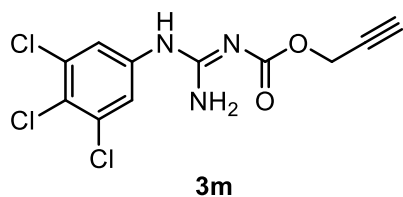

1-Propargyloxycarbonyl-2-(3',4',5'-trichlorophenyl)guanidine (compound **3m**) was obtained as a brown solid after purification through silica gel column chromatography (PE/EtOAc 2:1).  $^1\text{H}$  NMR (400 MHz,  $d_6$ -DMSO)  $\delta$  9.42 (br, 1H), 7.77 (s, 2H), 4.64 (d,  $J = 2.4$  Hz, 2H), 3.47 (t,  $J = 2.4$  Hz, 1H);  $^{13}\text{C}\{^1\text{H}\}$  NMR (101 MHz,  $d_6$ -DMSO)  $\delta$  162.0, 158.6, 140.6, 133.0, 123.3, 121.4, 80.1, 77.4, 52.4; HRMS (ESI)  $m/z$ :  $[\text{M} + \text{H}]^+$  Calcd for  $\text{C}_{11}\text{H}_9\text{Cl}_3\text{N}_3\text{O}_2$  319.9755; found 319.9752.

### 3.3. Synthesis of Compounds 4a-4m

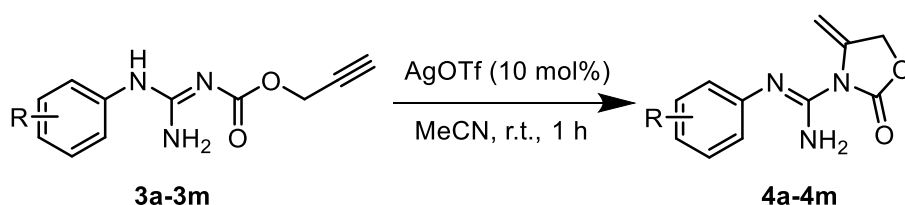

**General procedure:** A solution of compound **3a-3m** (1.0 equiv) and AgOTf (0.1 equiv) in MeCN was stirred at room temperature for 1 h. Then the reaction mixture was concentrated under vacuum, and the obtained crude was purified by silica gel column chromatography to

afford the target compound **4a-4m**.

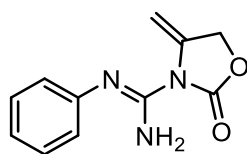

**4a**

4-Methylene-2-oxo-N'-phenyloxazolidine-3-carboximidamide (compound **4a**) was obtained in 94% yield (198 mg, 0.97 mmol) as a white liquid after purification through silica gel column chromatography (PE/EtOAc 7:1).  $^1\text{H}$  NMR (400 MHz,  $\text{CDCl}_3$ )  $\delta$  7.35 (m, 2H), 7.07 (m, 1H), 6.94 (m, 2H), 6.09 (q,  $J = 2.4$  Hz, 1H), 5.85 (br, 2H), 4.95 (t,  $J = 2.4$  Hz, 2H), 4.66 (q,  $J = 2.0$  Hz, 1H);  $^{13}\text{C}\{^1\text{H}\}$  NMR (101 MHz,  $\text{CDCl}_3$ )  $\delta$  156.3, 146.9, 145.2, 135.7, 129.7, 123.4, 121.8, 93.4, 67.3; HRMS (ESI)  $m/z$ :  $[\text{M} + \text{H}]^+$  Calcd for  $\text{C}_{11}\text{H}_{12}\text{N}_3\text{O}_2$  218.0924; found 218.0918.

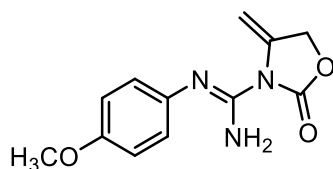

**4b**

N'-(4'-methoxyphenyl)-4-methylene-2-oxooxazolidine-3-carboximidamide (compound **4b**) was obtained in 78% yield (194 mg, 1.01 mmol) as a white liquid after purification through silica gel column chromatography (PE/EtOAc 6:1).  $^1\text{H}$  NMR (400 MHz,  $\text{CDCl}_3$ )  $\delta$  6.88 (m, 4H), 6.07 (q,  $J = 2.4$  Hz, 1H), 5.84 (br, 2H), 4.94 (t,  $J = 2.4$  Hz, 2H), 4.64 (q,  $J = 2.0$  Hz, 1H), 3.79 (s, 3H);  $^{13}\text{C}\{^1\text{H}\}$  NMR (101 MHz,  $\text{CDCl}_3$ )  $\delta$  156.3, 155.8, 145.6, 139.9, 135.8, 122.6, 115.0, 93.2, 67.3, 55.5; HRMS (ESI)  $m/z$ :  $[\text{M} + \text{H}]^+$  Calcd for  $\text{C}_{12}\text{H}_{14}\text{N}_3\text{O}_3$  248.1030; found 248.1033.

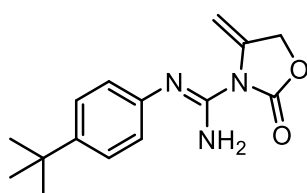

**4c**

N'-(4-(tert-butyl)phenyl)-4-methylene-2-oxooxazolidine-3-carboximidamide (compound **4c**) was obtained in 80% yield (218 mg, 1.00 mmol) as a white liquid after purification through silica gel column chromatography (PE/EtOAc 6:1).  $^1\text{H}$  NMR (400 MHz,  $\text{CDCl}_3$ )  $\delta$  7.37 (m, 2H), 6.88 (m, 2H), 6.09 (q,  $J = 2.4$  Hz, 1H), 5.86 (br, 2H), 4.94 (t,  $J = 2.4$  Hz, 2H), 4.64 (q,  $J = 2.0$  Hz, 1H), 1.32 (s, 9H);  $^{13}\text{C}\{^1\text{H}\}$  NMR (101 MHz,  $\text{CDCl}_3$ )  $\delta$  156.3, 146.2, 145.2, 144.1, 135.8, 126.5, 121.2, 93.3, 67.3, 34.3, 31.5; HRMS (ESI)  $m/z$ :  $[\text{M} + \text{H}]^+$  Calcd for  $\text{C}_{15}\text{H}_{20}\text{N}_3\text{O}_2$  274.1550; found 274.1546.

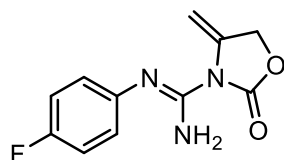

**4d**

N'-(4'-fluorophenyl)-4-methylene-2-oxooxazolidine-3-carboximidamide (compound **4d**) was obtained in 76% yield (177 mg, 0.99 mmol) as a white liquid after purification through silica gel column chromatography (PE/EtOAc 6:1).  $^1\text{H}$  NMR (400 MHz,  $\text{CDCl}_3$ )  $\delta$  7.04 (m, 2H), 6.89 (m, 2H), 6.06 (q,  $J = 2.4$  Hz, 1H), 5.87 (br, 2H), 4.95 (t,  $J = 2.4$  Hz, 2H), 4.66 (q,  $J = 2.0$  Hz, 1H);  $^{13}\text{C}\{^1\text{H}\}$  NMR (101 MHz,  $\text{CDCl}_3$ )  $\delta$  160.4, 157.1 (d,  $J = 180.8$  Hz), 145.7, 142.8 (d,  $J = 2.9$  Hz), 135.7, 122.9 (d,  $J = 8.0$  Hz), 116.4 (d,  $J = 22.6$  Hz), 93.5, 67.3;  $^{19}\text{F}$  NMR (376 MHz,  $\text{CDCl}_3$ )  $\delta$  -120.63 (s, 1F); HRMS (ESI)  $m/z$ :  $[\text{M} + \text{H}]^+$  Calcd for  $\text{C}_{11}\text{H}_{11}\text{FN}_3\text{O}_2$  236.0830; found 236.0825.

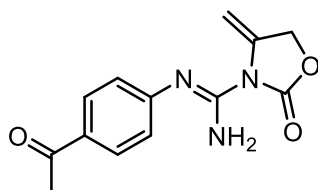

**4e**

N'-(4'-acetylphenyl)-4-methylene-2-oxooxazolidine-3-carboximidamide (compound **4e**) was obtained as a white solid after purification through silica gel column chromatography (PE/EtOAc 2:1).  $^1\text{H}$  NMR (400 MHz,  $\text{CDCl}_3$ )  $\delta$  7.94 (m, 2H), 7.00 (m, 2H), 6.05 (s, 1H), 5.97 (br, 2H), 4.95 (t,  $J = 1.6$  Hz, 2H), 4.66 (q,  $J = 2.4$  Hz, 1H), 2.56 (s, 3H);  $^{13}\text{C}\{^1\text{H}\}$  NMR (101 MHz,  $\text{CDCl}_3$ )  $\delta$  197.2, 156.1, 151.9, 144.9, 135.5, 132.5, 130.4, 121.9, 93.9, 67.3, 26.4; HRMS (ESI)  $m/z$ :  $[\text{M} + \text{H}]^+$  Calcd for  $\text{C}_{13}\text{H}_{14}\text{N}_3\text{O}_3$  260.1030; found 260.1022.

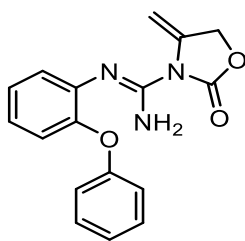

**4f**

4-Methylene-2-oxo-N'-(2'-phenoxyphenyl)oxazolidine-3-carboximidamide (compound **4f**) was obtained in 99% yield (313 mg, 1.02 mmol) as a white solid after purification through silica gel column chromatography (PE/EtOAc 8:1).  $^1\text{H}$  NMR (400 MHz,  $\text{CDCl}_3$ )  $\delta$  7.24 (m, 2H), 7.16 (m, 1H), 7.08 (m, 2H), 7.03 (d,  $J = 7.2$  Hz, 1H), 6.99 (m, 1H), 6.89 (m, 2H), 5.90 (br, 2H), 5.56 (q,  $J = 2.4$  Hz, 1H), 4.82 (t,  $J = 2.4$  Hz, 2H), 4.36 (q,  $J = 2.0$  Hz, 1H);  $^{13}\text{C}\{^1\text{H}\}$  NMR (101 MHz,  $\text{CDCl}_3$ )  $\delta$  158.0, 156.1, 147.3, 144.8, 138.7, 135.1, 129.5, 125.4, 124.6, 123.8, 122.3, 121.9, 117.0, 93.4, 67.2; HRMS (ESI)  $m/z$ :  $[\text{M} + \text{H}]^+$  Calcd for  $\text{C}_{17}\text{H}_{16}\text{N}_3\text{O}_3$  310.1186; found

310.1189.

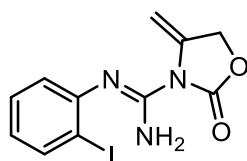

**4g**

N'-(2'-iodophenyl)-4-methylene-2-oxooxazolidine-3-carboximidamide (compound **4g**) was obtained in 85% yield (289 mg, 0.99 mmol) as a white liquid after purification through silica gel column chromatography (PE/EtOAc 8:1).  $^1\text{H}$  NMR (400 MHz,  $\text{CDCl}_3$ )  $\delta$  7.86 (dd,  $J = 8.0$ , 1.6 Hz, 1H), 7.32 (m, 1H), 6.94 (dd,  $J = 8.0$ , 1.6 Hz, 1H), 6.79 (m, 1H), 6.37 (q,  $J = 2.0$  Hz, 1H), 5.90 (br, 2H), 4.96 (t,  $J = 2.4$  Hz, 2H), 4.70 (q,  $J = 1.6$  Hz, 1H);  $^{13}\text{C}\{^1\text{H}\}$  NMR (101 MHz,  $\text{CDCl}_3$ )  $\delta$  156.3, 148.7, 145.4, 139.7, 135.2, 129.6, 125.0, 121.7, 94.8, 93.1, 67.4; HRMS (ESI)  $m/z$ :  $[\text{M} + \text{H}]^+$  Calcd for  $\text{C}_{11}\text{H}_{11}\text{IN}_3\text{O}_2$  343.9890; found 343.9886.

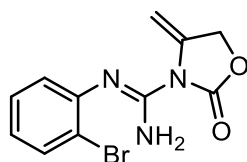

**4h**

N'-(2'-bromophenyl)-4-methylene-2-oxooxazolidine-3-carboximidamide (compound **4h**) was obtained in 91% yield (273 mg, 1.01 mmol) as a white liquid after purification through silica gel column chromatography (PE/EtOAc 8:1).  $^1\text{H}$  NMR (400 MHz,  $\text{CDCl}_3$ )  $\delta$  7.63 (dd,  $J = 8.0$ , 1.6 Hz, 1H), 7.30 (m, 1H), 6.97 (m, 2H), 6.30 (q,  $J = 2.4$  Hz, 1H), 5.89 (br, 2H), 4.99 (t,  $J = 2.4$  Hz, 2H), 4.72 (q,  $J = 2.0$  Hz, 1H);  $^{13}\text{C}\{^1\text{H}\}$  NMR (101 MHz,  $\text{CDCl}_3$ )  $\delta$  156.2, 145.4, 145.2, 135.3, 133.5, 128.7, 124.7, 122.9, 116.9, 94.3, 67.4; HRMS (ESI)  $m/z$ :  $[\text{M} + \text{H}]^+$  Calcd for  $\text{C}_{11}\text{H}_{11}\text{BrN}_3\text{O}_2$  296.0029; found 296.0023.

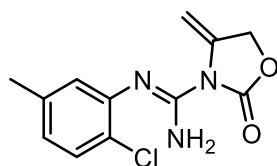

**4i**

N'-(2'-chloro-5'-methylphenyl)-4-methylene-2-oxooxazolidine-3-carboximidamide (compound **4i**) was obtained in 91% yield (241 mg, 1.00 mmol) as a white liquid after purification through silica gel column chromatography (PE/EtOAc 7:1).  $^1\text{H}$  NMR (400 MHz,  $\text{CDCl}_3$ )  $\delta$  7.29 (d,  $J = 8.0$  Hz, 1H), 6.81 (m, 2H), 6.21 (q,  $J = 2.4$  Hz, 1H), 5.84 (br, 2H), 4.96 (t,  $J = 2.4$  Hz, 2H), 4.68 (q,  $J = 2.0$  Hz, 1H), 2.30 (s, 3H);  $^{13}\text{C}\{^1\text{H}\}$  NMR (101 MHz,  $\text{CDCl}_3$ )  $\delta$  156.2, 145.0, 143.5, 138.0, 135.4, 130.0, 125.3, 123.6, 122.9, 94.0, 67.4, 20.9; HRMS (ESI)  $m/z$ :  $[\text{M} + \text{H}]^+$  Calcd for  $\text{C}_{12}\text{H}_{13}\text{ClN}_3\text{O}_2$  266.0691; found 266.0689.



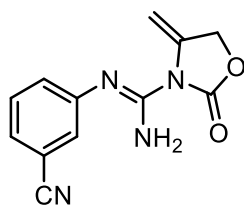

**4j**

N'-(3'-cyanophenyl)-4-methylene-2-oxooxazolidine-3-carboximidamide (compound **4j**) was obtained as a white solid after purification through silica gel column chromatography (PE/EtOAc 2:1).  $^1\text{H}$  NMR (400 MHz,  $\text{CDCl}_3$ )  $\delta$  7.43 (t,  $J = 8.0$  Hz, 1H), 7.34 (m, 1H), 7.22 (t,  $J = 8.0$  Hz, 2H), 7.17 (m, 1H), 6.03 (s, 1H), 5.97 (br, 2H), 4.95 (t,  $J = 2.4$  Hz, 2H), 4.67 (q,  $J = 2.4$  Hz, 1H);  $^{13}\text{C}\{^1\text{H}\}$  NMR (101 MHz,  $\text{CDCl}_3$ )  $\delta$  156.1, 147.8, 145.8, 135.4, 130.6, 126.9, 126.8, 125.4, 118.7, 113.6, 94.1, 67.3; HRMS (ESI)  $m/z$ :  $[\text{M} + \text{H}]^+$  Calcd for  $\text{C}_{12}\text{H}_{11}\text{N}_4\text{O}_2$  243.0877; found 243.0867.

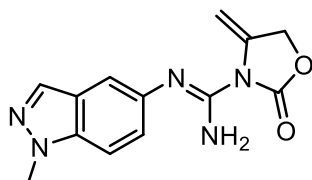

**4k**

N'-(1'-methyl-1H-indazol-5'-yl)-4-methylene-2-oxooxazolidine-3-carboximidamide (compound **4k**) was obtained as a white solid after purification through silica gel column chromatography (PE/EtOAc 1:1).  $^1\text{H}$  NMR (400 MHz,  $\text{CDCl}_3$ )  $\delta$  7.84 (s, 1H), 7.35 (d,  $J = 8.8$  Hz, 1H), 7.20 (d,  $J = 2.4$  Hz, 1H), 7.02 (dd,  $J = 8.8, 2.0$  Hz, 1H), 6.09 (s, 1H), 5.91 (br, 2H), 4.93 (t,  $J = 2.4$  Hz, 2H), 4.65 (q,  $J = 2.4$  Hz, 1H), 4.62 (s, 3H);  $^{13}\text{C}\{^1\text{H}\}$  NMR (101 MHz,  $\text{CDCl}_3$ )  $\delta$  156.2, 145.9, 140.0, 137.3, 135.8, 132.0, 124.8, 122.7, 111.5, 110.2, 93.2, 67.3, 35.6; HRMS (ESI)  $m/z$ :  $[\text{M} + \text{H}]^+$  Calcd for  $\text{C}_{13}\text{H}_{14}\text{N}_5\text{O}_2$  272.1142; found 272.1133.

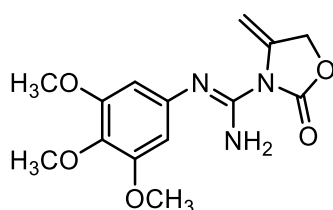

**4l**

4-Methylene-2-oxo-N'-(3',4',5'-trimethoxyphenyl)oxazolidine-3-carboximidamide (compound **4l**) was obtained in 90% yield (264 mg, 0.96 mmol) as a white solid after purification through silica gel column chromatography (PE/EtOAc 2:1).  $^1\text{H}$  NMR (400 MHz,  $\text{CDCl}_3$ )  $\delta$  6.17 (s, 2H), 6.07 (q,  $J = 2.4$  Hz, 1H), 5.94 (br, 2H), 4.94 (t,  $J = 2.4$  Hz, 2H), 4.66 (q,  $J = 2.0$  Hz, 1H), 3.82 (s, 6H), 3.81 (s, 3H);  $^{13}\text{C}\{^1\text{H}\}$  NMR (101 MHz,  $\text{CDCl}_3$ )  $\delta$  156.2, 154.1, 145.7, 143.0, 135.7, 133.9, 99.1, 93.5, 67.3, 61.0, 56.1; HRMS (ESI)  $m/z$ :  $[\text{M} + \text{H}]^+$  Calcd for  $\text{C}_{14}\text{H}_{18}\text{N}_3\text{O}_5$  308.1241;

found 308.1236.

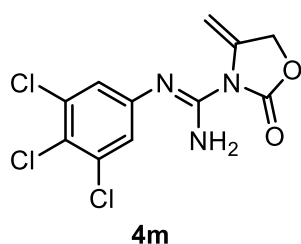

4-Methylene-2-oxo-N'-(3',4',5'-trichlorophenyl)oxazolidine-3-carboximidamide (compound **4m**) was obtained in 69% yield (221 mg, 1.00 mmol) as a white solid after purification through silica gel column chromatography (PE/EtOAc 8:1). <sup>1</sup>H NMR (400 MHz, CDCl<sub>3</sub>) δ 7.00 (s, 2H), 6.01 (br, 3H), 4.95 (t, *J* = 2.4 Hz, 2H), 4.67 (q, *J* = 2.0 Hz, 1H); <sup>13</sup>C{<sup>1</sup>H} NMR (101 MHz, CDCl<sub>3</sub>) δ 156.1, 146.4, 146.0, 135.2, 134.8, 125.6, 122.5, 94.3, 67.3; HRMS (ESI) *m/z*: [M + H]<sup>+</sup> Calcd for C<sub>11</sub>H<sub>9</sub>Cl<sub>3</sub>N<sub>3</sub>O<sub>2</sub> 319.9755; found 319.9724.

### 3.4. Synthesis of Compounds 5a-5e

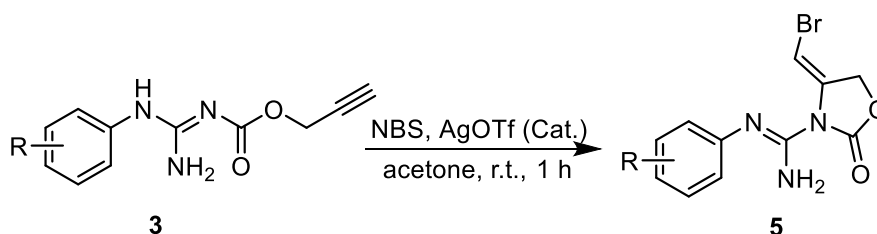

**General procedure:** A solution of compound **3** (1.0 equiv), NBS (1.2 equiv) and AgOTf (0.1 equiv) in acetone was stirred at room temperature for 1 h. The reaction mixture was diluted with DCM, and washed with H<sub>2</sub>O and brine. After being dried over anhydrous Na<sub>2</sub>SO<sub>4</sub>, the organic was concentrated and purified via silica gel column chromatography to afford the target compound **5a-5e**.

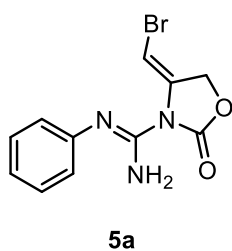

4-(Bromomethylene)-2-oxo-N'-phenyloxazolidine-3-carboximidamide (compound **5a**) was obtained in 77% yield (228 mg, 1.00 mmol) as a white solid after purification through silica gel column chromatography (PE/EtOAc 10:1). <sup>1</sup>H NMR (400 MHz, CDCl<sub>3</sub>) δ 7.49 (t, *J* = 2.8 Hz, 1H), 7.38 (m, 2H), 7.11 (t, *J* = 7.6 Hz, 1H), 6.94 (m, 2H), 5.96 (br, 2H), 4.97 (d, *J* = 2.8 Hz, 2H); <sup>13</sup>C{<sup>1</sup>H} NMR (101 MHz, CDCl<sub>3</sub>) δ 156.1, 146.3, 145.0, 132.3, 129.8, 123.7, 121.8, 90.8, 68.1; HRMS (ESI) *m/z*: [M + H]<sup>+</sup> Calcd for C<sub>11</sub>H<sub>11</sub>BrN<sub>3</sub>O<sub>2</sub> 296.0029; found 296.0032.

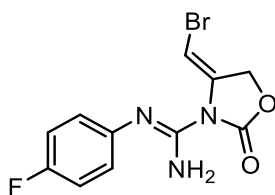

**5b**

4-(Bromomethylene)-N'-(4'-fluorophenyl)-2-oxooxazolidine-3-carboximidamide (compound **5b**) was obtained in 73% yield (228 mg, 1.00 mmol) as a white solid after purification through silica gel column chromatography (PE/EtOAc 10:1).  $^1\text{H}$  NMR (400 MHz,  $\text{CDCl}_3$ )  $\delta$  7.44 (t,  $J = 2.8$  Hz, 1H), 7.05 (m, 2H), 6.86 (m, 2H), 5.95 (br, 2H), 4.95 (d,  $J = 2.8$  Hz, 2H);  $^{13}\text{C}\{^1\text{H}\}$  NMR (101 MHz,  $\text{CDCl}_3$ )  $\delta$  160.5, 157.1 (d,  $J = 212.6$  Hz), 145.5, 142.2 (d,  $J = 2.9$  Hz), 132.3, 123.0 (d,  $J = 8.0$  Hz), 116.5 (d,  $J = 22.3$  Hz), 90.9, 68.1;  $^{19}\text{F}$  NMR (376 MHz,  $\text{CDCl}_3$ )  $\delta$  -120.15 (s, 1F); HRMS (ESI)  $m/z$ :  $[\text{M} + \text{H}]^+$  Calcd for  $\text{C}_{11}\text{H}_{10}\text{FBrN}_3\text{O}_2$  313.9935; found 313.9938.

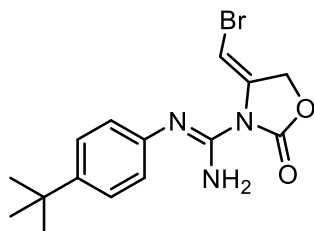

**5c**

4-(Bromomethylene)-N'-(4'-(tert-butyl)phenyl)-2-oxooxazolidine-3-carboximidamide (compound **5c**) was obtained in 82% yield (288 mg, 1.00 mmol) as a yellow liquid after purification through silica gel column chromatography (PE/EtOAc 15:1).  $^1\text{H}$  NMR (400 MHz,  $\text{CDCl}_3$ )  $\delta$  7.47 (t,  $J = 2.8$  Hz, 1H), 7.37 (m, 2H), 6.86 (m, 2H), 5.95 (br, 2H), 4.95 (d,  $J = 2.8$  Hz, 1H), 1.32 (s, 9H);  $^{13}\text{C}\{^1\text{H}\}$  NMR (101 MHz,  $\text{CDCl}_3$ )  $\delta$  156.1, 146.5, 145.0, 143.4, 132.4, 126.6, 121.2, 90.8, 68.1, 34.3, 31.5; HRMS (ESI)  $m/z$ :  $[\text{M} + \text{H}]^+$  Calcd for  $\text{C}_{15}\text{H}_{19}\text{BrN}_3\text{O}_2$  352.0655; found 352.0661.

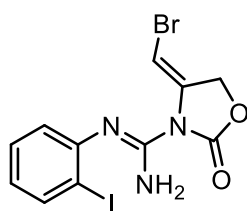

**5d**

4-(Bromomethylene)-N'-(2'-iodophenyl)-2-oxooxazolidine-3-carboximidamide (compound **5d**) was obtained in 56% yield (237 mg, 1.00 mmol) as a white solid after purification through silica gel column chromatography (PE/EtOAc 13:1).  $^1\text{H}$  NMR (400 MHz,  $\text{CDCl}_3$ )  $\delta$  7.87 (dd,  $J = 8.0, 1.6$  Hz, 1H), 7.66 (t,  $J = 2.8$  Hz, 1H), 7.33 (m, 1H), 6.93 (dd,  $J = 8.0, 1.6$  Hz, 1H), 6.81 (m, 1H), 5.96 (br, 2H), 4.98 (d,  $J = 2.8$  Hz, 1H);  $^{13}\text{C}\{^1\text{H}\}$  NMR (101 MHz,  $\text{CDCl}_3$ )  $\delta$  156.0, 148.0, 145.1, 139.8, 131.9, 129.7, 125.3, 121.6, 93.3, 91.7, 68.2; HRMS (ESI)  $m/z$ :  $[\text{M} + \text{H}]^+$  Calcd for  $\text{C}_{11}\text{H}_{10}\text{BrIN}_3\text{O}_2$  421.8996; found 421.8984.

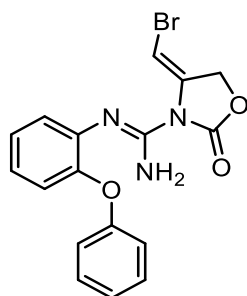

**5e**

4-(Bromomethylene)-2-oxo-N'-(2'-phenoxyphenyl)oxazolidine-3-carboximidamide (compound **5e**) was obtained in 70% yield (293 mg, 1.09 mmol) as a white liquid after purification through silica gel column chromatography (PE/EtOAc 12:1).  $^1\text{H}$  NMR (400 MHz,  $\text{CDCl}_3$ )  $\delta$  7.26 (m, 2H), 7.18 (m, 1H), 7.11 (m, 2H), 7.01 (m, 2H), 6.86 (m, 2H), 6.79 (t,  $J = 2.8$  Hz, 1H), 5.99 (br, 2H), 4.82 (d,  $J = 2.8$  Hz, 2H);  $^{13}\text{C}$   $\{^1\text{H}\}$  NMR (101 MHz,  $\text{CDCl}_3$ )  $\delta$  157.8, 155.9, 147.3, 144.6, 138.1, 131.6, 129.5, 125.5, 124.9, 123.7, 122.6, 122.3, 116.6, 90.8, 68.0; HRMS (ESI)  $m/z$ :  $[\text{M} + \text{H}]^+$  Calcd for  $\text{C}_{17}\text{H}_{15}\text{BrN}_3\text{O}_3$  388.0291; found 388.0297.

### 3.5. Synthesis of Compounds 6a-6g

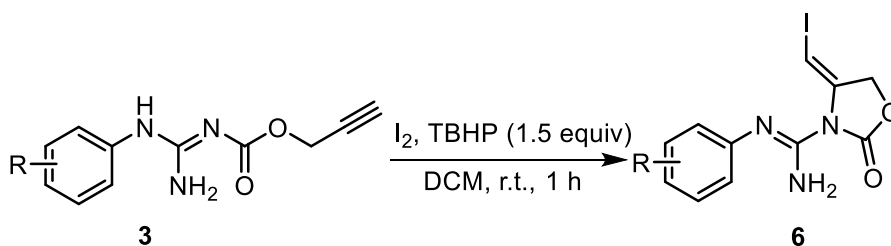

**General procedure:** A solution of compound **3** (1.0 equiv),  $\text{I}_2$  (1.5 equiv) and TBHP (1.5 equiv) in DCM was stirred at room temperature for 1 h. Then the reaction mixture was diluted with DCM and quenched with  $\text{Na}_2\text{S}_2\text{O}_3$  aqueous solution. After being washed with brine and dried over anhydrous  $\text{Na}_2\text{SO}_4$ , the organic was concentrated under vacuum and purified by silica gel column chromatography to afford the target compound **6**.

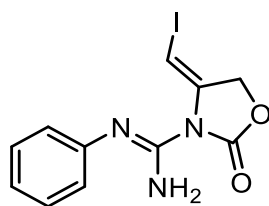

**6a**

4-(Iodomethylene)-2-oxo-N'-phenyloxazolidine-3-carboximidamide (compound **6a**) was obtained in 85% yield (292 mg, 1.00 mmol) as a white solid after purification through silica gel column chromatography (PE/EtOAc 10:1).  $^1\text{H}$  NMR (400 MHz,  $\text{CDCl}_3$ )  $\delta$  7.40 (t,  $J = 2.4$  Hz, 1H), 7.36 (m, 2H), 7.09 (t,  $J = 7.6$  Hz, 1H), 6.92 (dd,  $J = 8.4, 1.2$  Hz, 2H), 5.91 (br, 2H), 4.86 (d,  $J = 2.8$  Hz, 2H);  $^{13}\text{C}$   $\{^1\text{H}\}$  NMR (101 MHz,  $\text{CDCl}_3$ )  $\delta$  156.5, 146.3, 145.2, 134.6, 129.8, 123.7, 121.8, 71.7, 60.7; HRMS (ESI)  $m/z$ :  $[\text{M} + \text{H}]^+$  Calcd for  $\text{C}_{11}\text{H}_{11}\text{IN}_3\text{O}_2$  343.9890; found

343.9878.

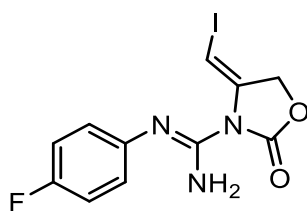

**6b**

N'-(4'-fluorophenyl)-4-(iodomethylene)-2-oxooxazolidine-3-carboximidamide (compound **6b**) was obtained in 85% yield (305 mg, 1.00 mmol) as a white solid after purification through silica gel column chromatography (PE/EtOAc 10:1).  $^1\text{H}$  NMR (400 MHz,  $\text{CDCl}_3$ )  $\delta$  7.38 (t,  $J$  = 2.8 Hz, 1H), 7.05 (m, 2H), 6.87 (m, 2H), 5.92 (br, 2H), 4.86 (d,  $J$  = 2.8 Hz, 2H);  $^{13}\text{C}\{^1\text{H}\}$  NMR (101 MHz,  $\text{CDCl}_3$ )  $\delta$  160.5, 157.3 (d,  $J$  = 171.4 Hz), 145.7, 142.2 (d,  $J$  = 2.6 Hz), 134.5, 123.0 (d,  $J$  = 7.7 Hz), 116.5 (d,  $J$  = 22.3 Hz), 71.7, 60.7;  $^{19}\text{F}$  NMR (376 MHz,  $\text{CDCl}_3$ )  $\delta$  -120.13 (s, 1F); HRMS (ESI)  $m/z$ :  $[\text{M} + \text{H}]^+$  Calcd for  $\text{C}_{11}\text{H}_{10}\text{FIN}_3\text{O}_2$  361.9796; found 361.9799.

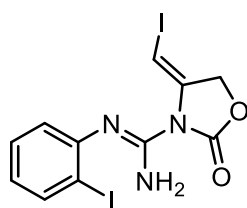

**6c**

4-(Iodomethylene)-N'-(2'-iodophenyl)-2-oxooxazolidine-3-carboximidamide (compound **6c**) was obtained in 91% yield (425 mg, 1.00 mmol) as a white solid after purification through silica gel column chromatography (PE/EtOAc 10:1).  $^1\text{H}$  NMR (400 MHz,  $\text{CDCl}_3$ )  $\delta$  7.87 (dd,  $J$  = 8.0, 1.6 Hz, 1H), 7.61 (t,  $J$  = 2.8 Hz, 1H), 7.32 (m, 1H), 6.93 (dd,  $J$  = 8.0, 1.6 Hz, 1H), 6.81 (m, 1H), 5.93 (br, 2H), 4.88 (d,  $J$  = 2.8 Hz, 2H);  $^{13}\text{C}\{^1\text{H}\}$  NMR (101 MHz,  $\text{CDCl}_3$ )  $\delta$  156.4, 148.0, 145.3, 139.8, 134.1, 129.7, 125.2, 121.6, 93.3, 71.7, 61.8; HRMS (ESI)  $m/z$ :  $[\text{M} + \text{H}]^+$  Calcd for  $\text{C}_{11}\text{H}_{10}\text{I}_2\text{N}_3\text{O}_2$  469.8857; found 469.8844.

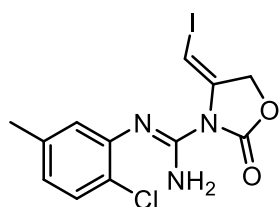

**6d**

N'-(2'-chloro-5'-methylphenyl)-4-(iodomethylene)-2-oxooxazolidine-3-carboximidamide (compound **6d**) was obtained in 90% yield (355 mg, 1.01 mmol) as a white solid after purification through silica gel column chromatography (PE/EtOAc 10:1).  $^1\text{H}$  NMR (400 MHz,  $\text{CDCl}_3$ )  $\delta$  7.46 (t,  $J$  = 2.8 Hz, 1H), 7.29 (d,  $J$  = 8.4 Hz, 1H), 6.85 (dd,  $J$  = 8.4, 2.0 Hz, 1H), 6.78

(d,  $J = 2.0$  Hz, 1H), 5.89 (br, 2H), 4.87 (d,  $J = 2.8$  Hz, 2H), 2.30 (s, 3H);  $^{13}\text{C}\{^1\text{H}\}$  NMR (101 MHz,  $\text{CDCl}_3$ )  $\delta$  156.4, 145.0, 142.9, 138.1, 134.3, 130.0, 125.5, 123.6, 123.4, 71.7, 61.0, 20.9; HRMS (ESI)  $m/z$ :  $[\text{M} + \text{H}]^+$  Calcd for  $\text{C}_{12}\text{H}_{12}\text{ClIN}_3\text{O}_2$  391.9657; found 391.9649.

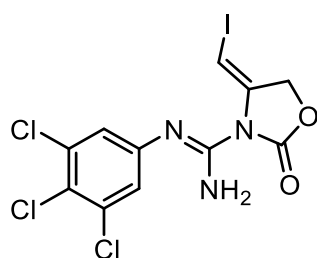

**6e**

4-(Iodomethylene)-2-oxo- $N'$ -(3',4',5'-trichlorophenyl)oxazolidine-3-carboximidamide (compound **6e**) was obtained in 81% yield (363 mg, 1.00 mmol) as a white solid after purification through silica gel column chromatography (PE/EtOAc 10:1).  $^1\text{H}$  NMR (400 MHz,  $\text{CDCl}_3$ )  $\delta$  7.30 (t,  $J = 2.8$  Hz, 1H), 6.98 (s, 2H), 6.08 (br, 2H), 4.87 (d,  $J = 2.8$  Hz, 2H);  $^{13}\text{C}\{^1\text{H}\}$  NMR (101 MHz,  $\text{CDCl}_3$ )  $\delta$  156.3, 146.0, 145.7, 134.9, 134.0, 125.9, 122.5, 71.7, 61.1; HRMS (ESI)  $m/z$ :  $[\text{M} + \text{H}]^+$  Calcd for  $\text{C}_{11}\text{H}_8\text{Cl}_3\text{N}_3\text{O}_2$  445.8721; found 445.8712.

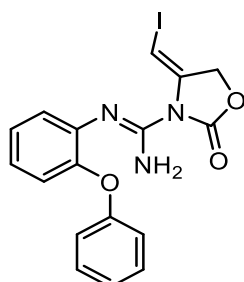

**6f**

4-(Iodomethylene)-2-oxo- $N'$ -(2'-phenoxyphenyl)oxazolidine-3-carboximidamide (compound **6f**) was obtained in 83% yield (363 mg, 1.00 mmol) as a white liquid after purification through silica gel column chromatography (PE/EtOAc 13:1).  $^1\text{H}$  NMR (400 MHz,  $\text{CDCl}_3$ )  $\delta$  7.27 (m, 2H), 7.18 (m, 1H), 7.12 (m, 2H), 7.03 (m, 2H), 6.86 (m, 2H), 6.72 (t,  $J = 2.8$  Hz, 2H), 5.95 (br, 2H), 4.72 (d,  $J = 2.8$  Hz, 2H);  $^{13}\text{C}\{^1\text{H}\}$  NMR (101 MHz,  $\text{CDCl}_3$ )  $\delta$  157.8, 156.3, 147.2, 144.8, 138.2, 133.7, 129.5, 125.6, 124.9, 123.8, 122.7, 122.4, 116.6, 71.5, 60.6; HRMS (ESI)  $m/z$ :  $[\text{M} + \text{H}]^+$  Calcd for  $\text{C}_{17}\text{H}_{15}\text{IN}_3\text{O}_3$  436.0153; found 436.0146.

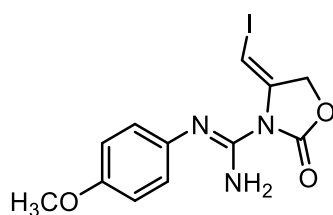

**6g**

4-(Iodomethylene)- $N'$ -(4'-methoxyphenyl)-2-oxooxazolidine-3-carboximidamide (compound

**6g**) was obtained in 71% yield (265 mg, 1.00 mmol) as a white solid after purification through silica gel column chromatography (PE/EtOAc 10:1).  $^1\text{H}$  NMR (400 MHz,  $\text{CDCl}_3$ )  $\delta$  7.39 (t,  $J = 2.8$  Hz, 1H), 6.88 (m, 4H), 5.90 (br, 2H), 4.86 (d,  $J = 2.8$  Hz, 2H), 3.80 (s, 3H);  $^{13}\text{C}\{^1\text{H}\}$  NMR (101 MHz,  $\text{CDCl}_3$ )  $\delta$  156.5, 156.0, 145.6, 139.2, 134.6, 122.6, 115.1, 71.7, 60.6, 55.6; HRMS (ESI)  $m/z$ :  $[\text{M} + \text{H}]^+$  Calcd for  $\text{C}_{12}\text{H}_{13}\text{IN}_3\text{O}_3$  373.9996; found 373.9989.

#### 4. NMR spectra

7.43  
7.43  
7.41  
7.41  
7.40  
7.39  
7.31  
7.31  
7.31  
7.30  
7.29  
7.29  
7.28  
7.28  
7.27

4.45  
4.44

2.33  
2.33  
2.32

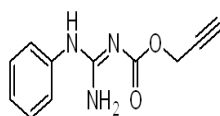

$^1\text{H}$  NMR:  $\text{CDCl}_3$ , 400 MHz

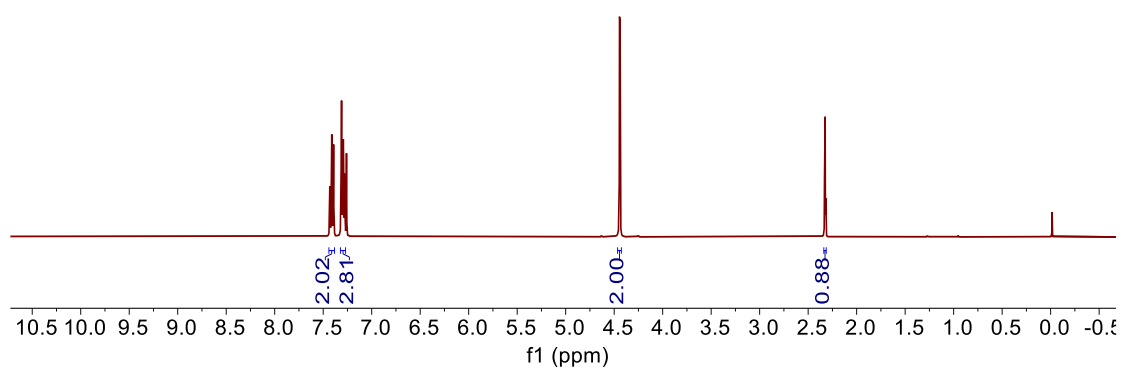

162.9  
160.9

136.2  
129.8  
127.0  
126.2

79.1  
73.6

51.7

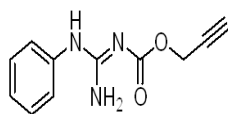

$^{13}\text{C}\{^1\text{H}\}$  NMR:  $\text{CDCl}_3$ , 101 MHz

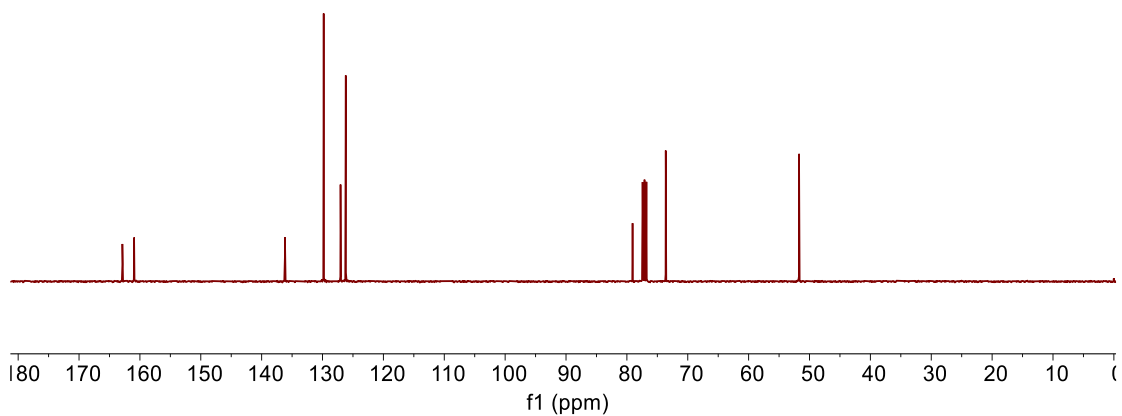



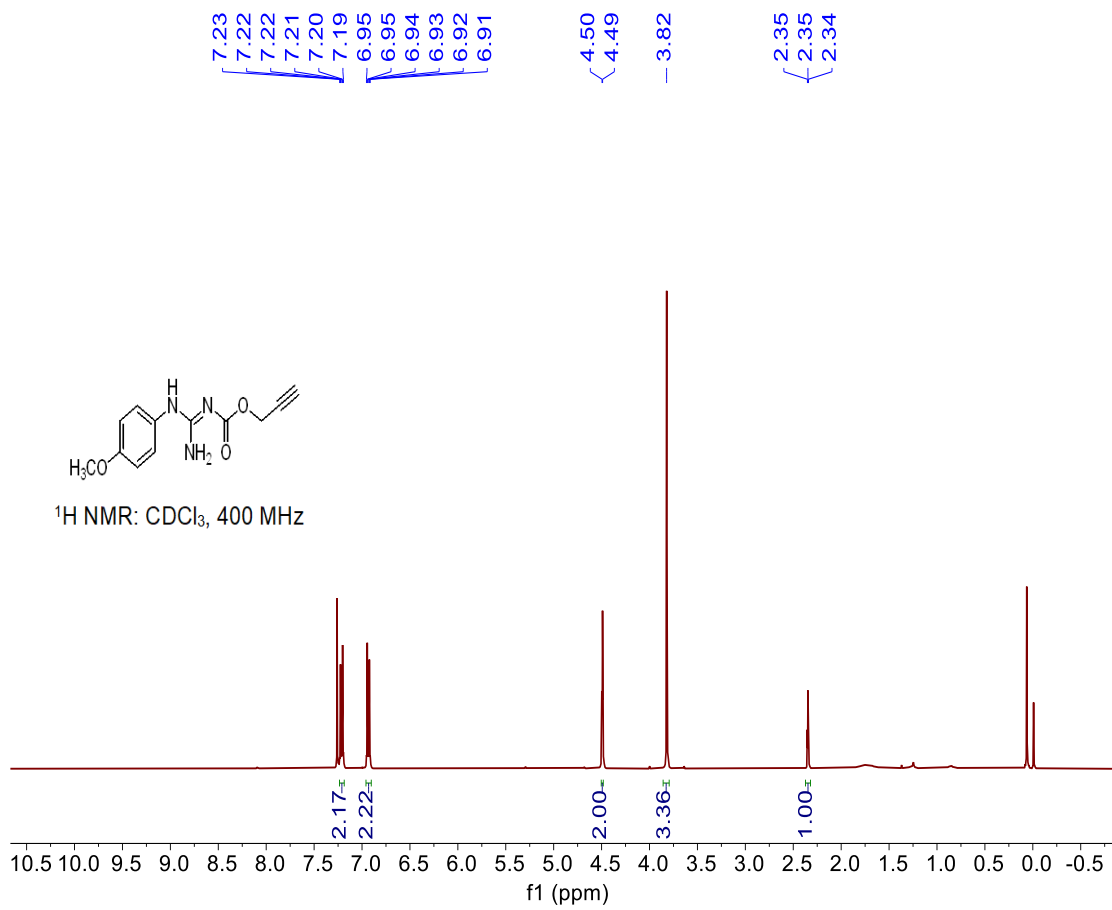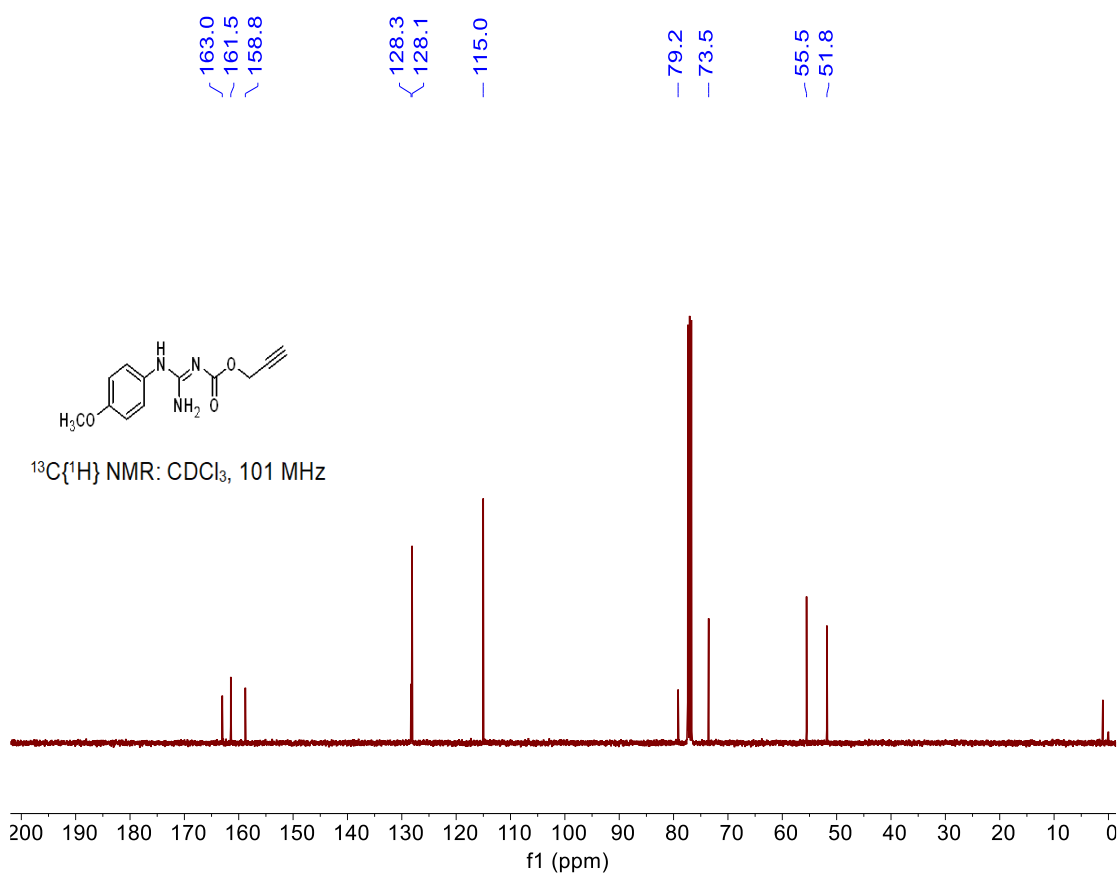

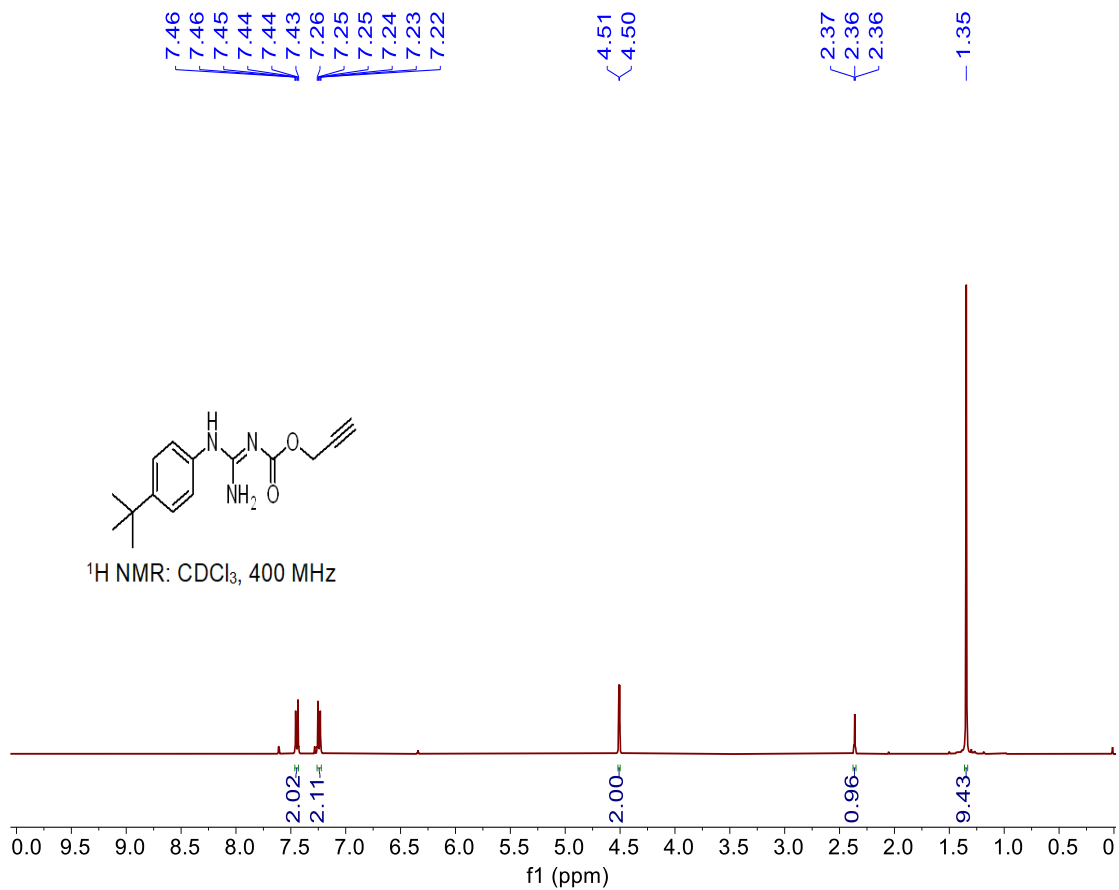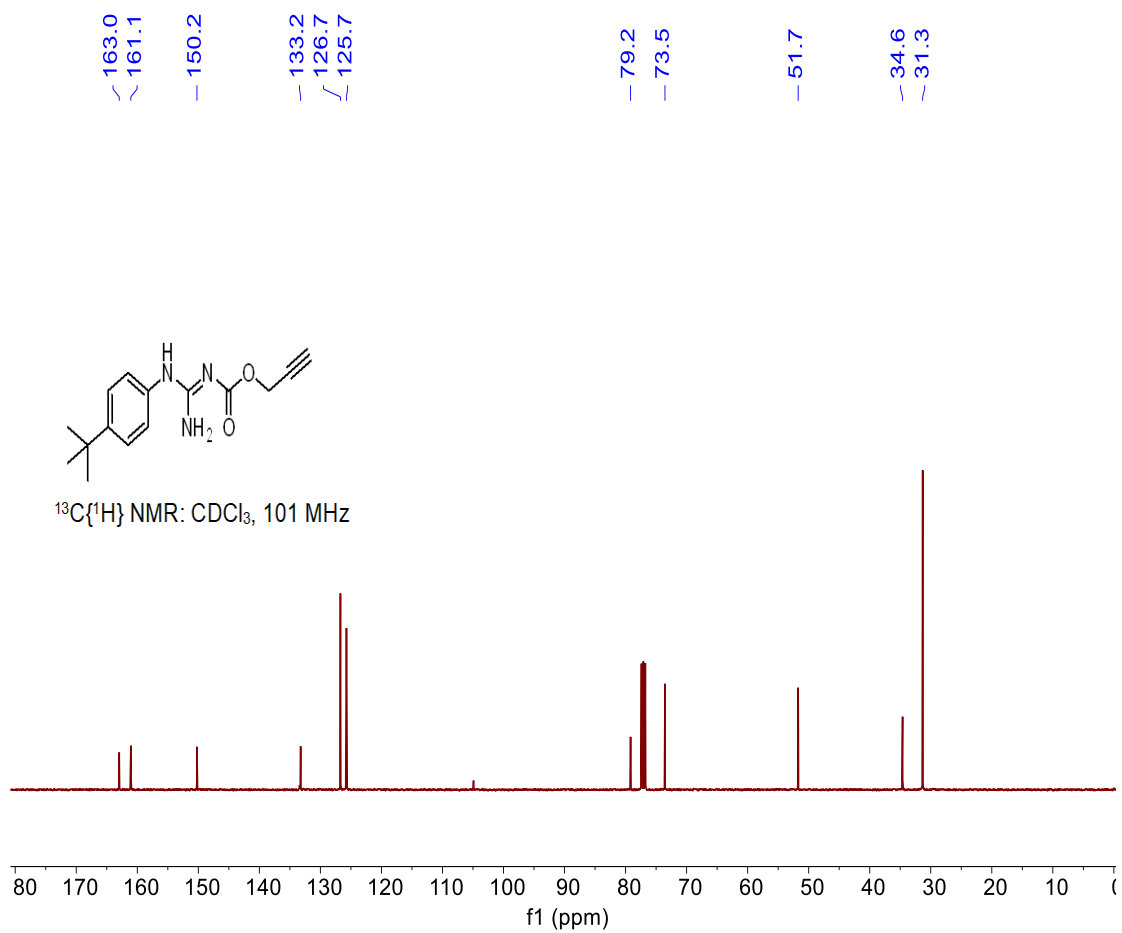

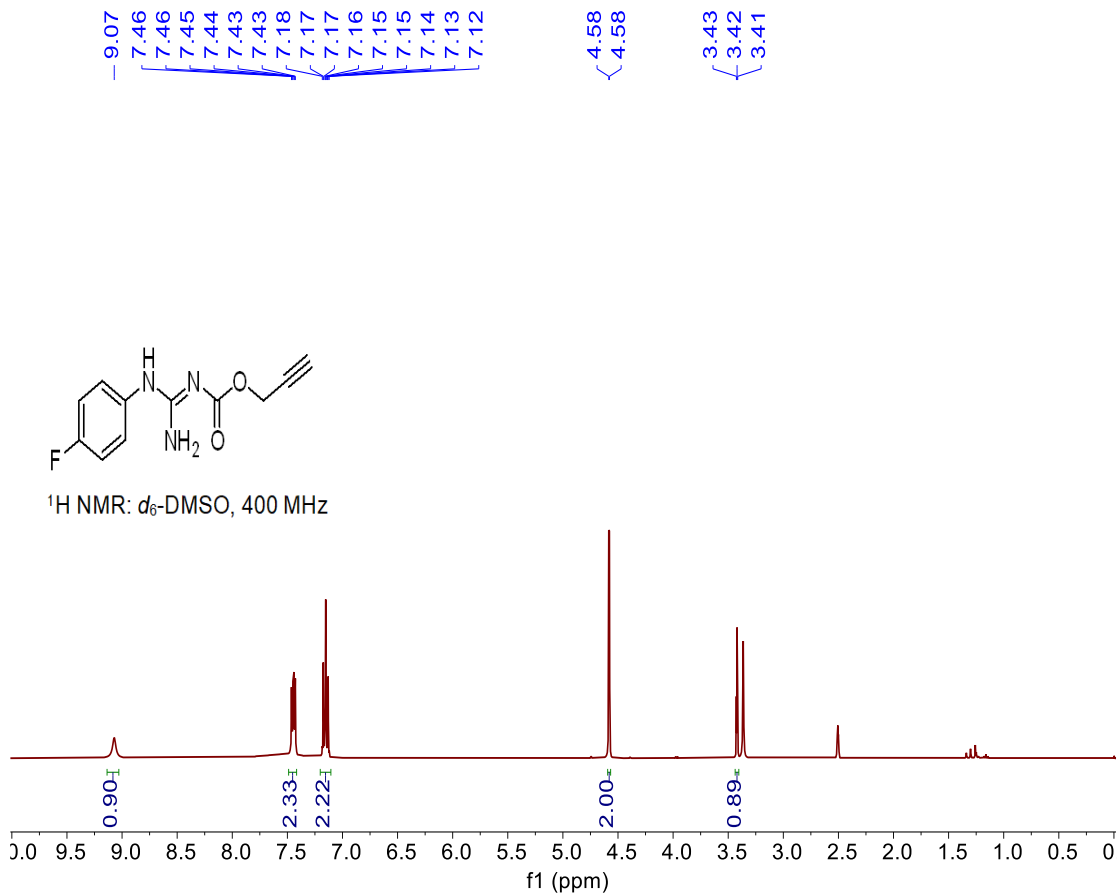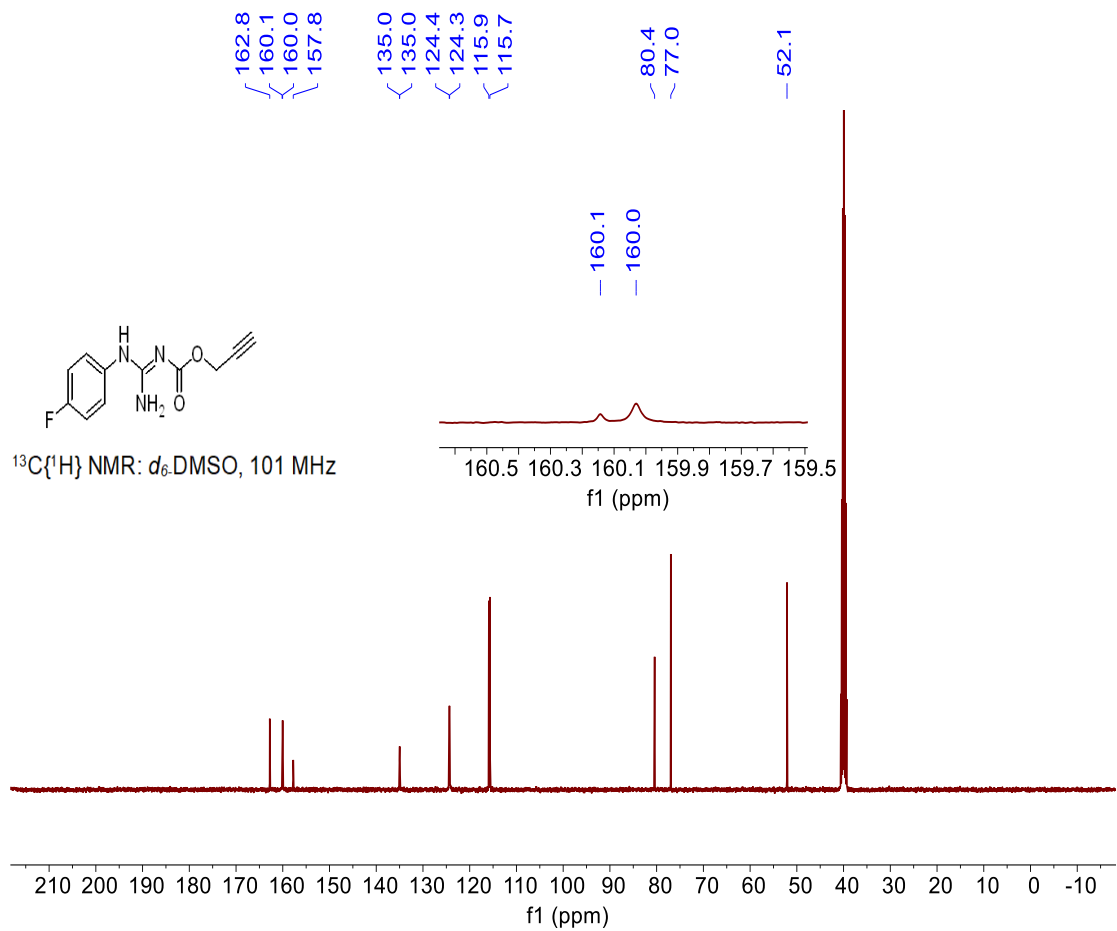

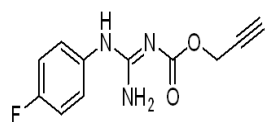

$^{19}\text{F}$  NMR:  $d_6$ -DMSO, 376 MHz

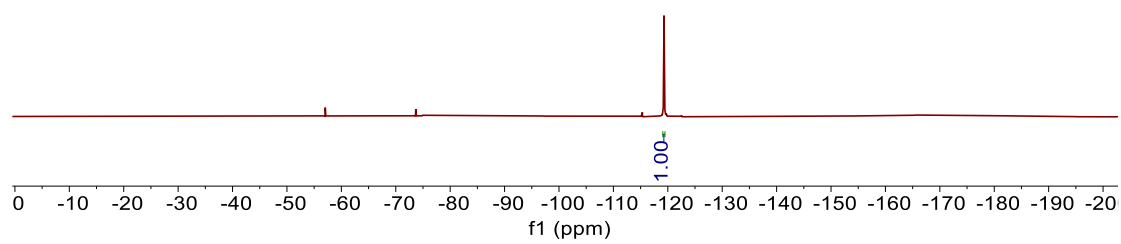

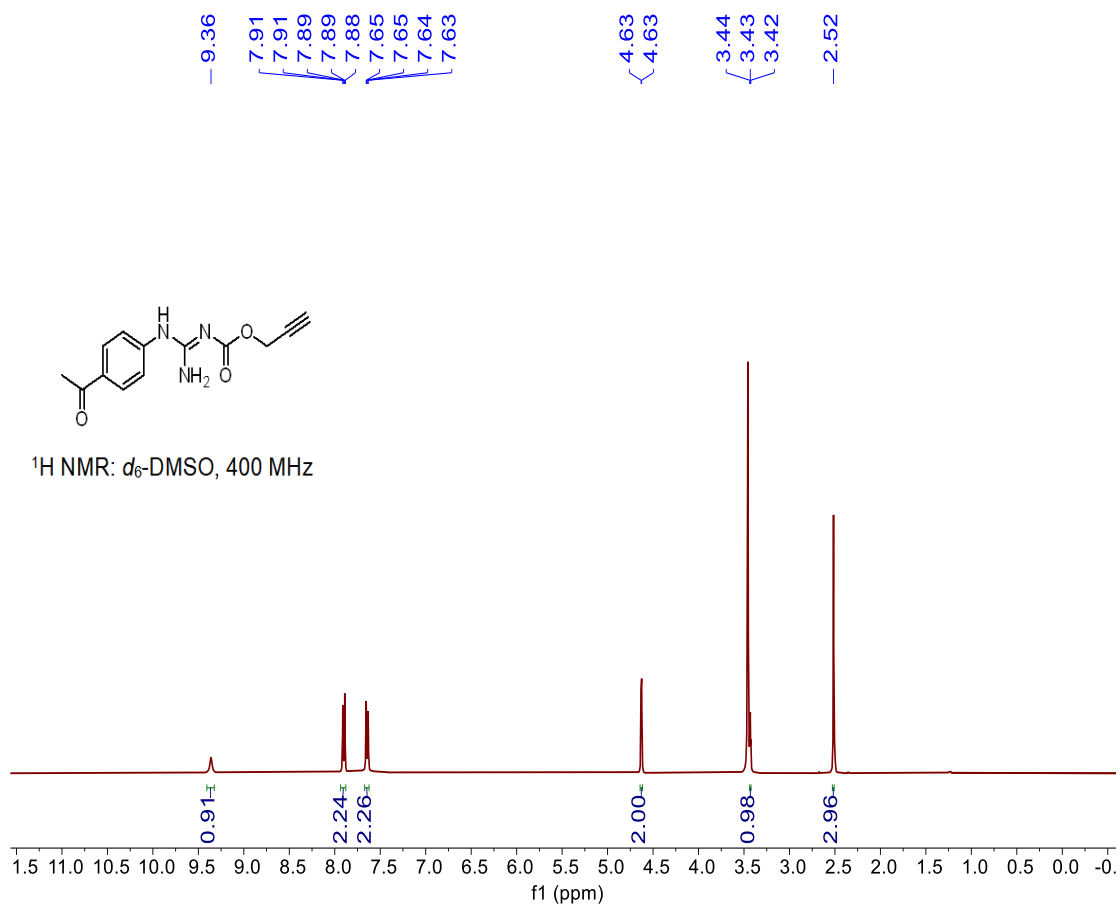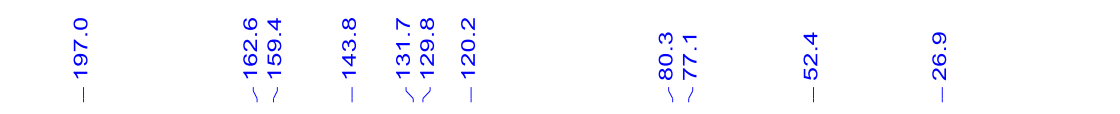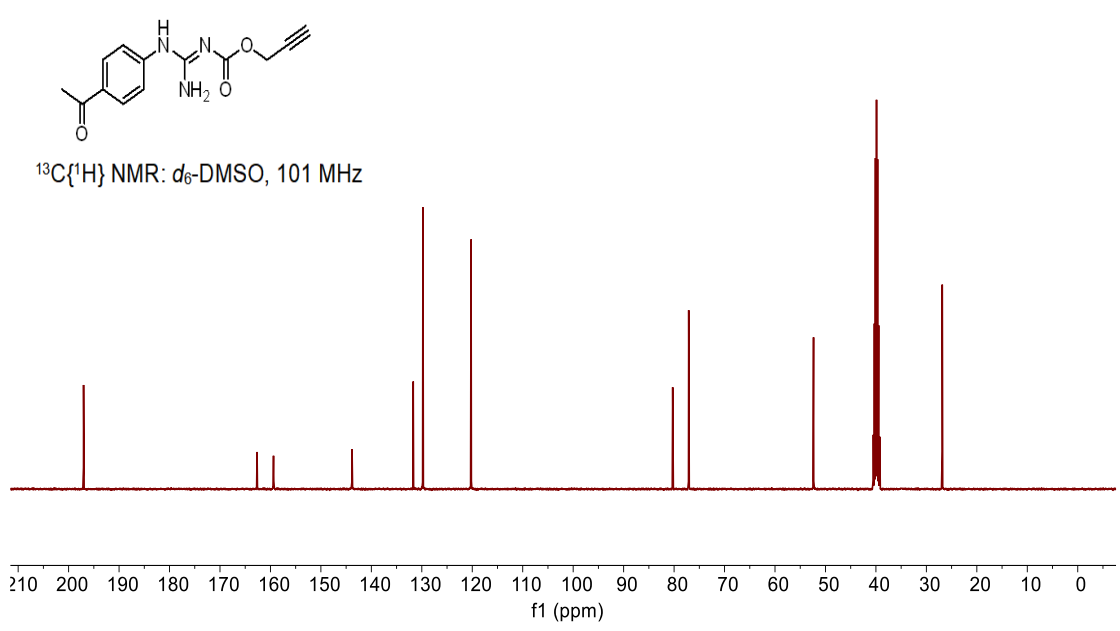

7.44  
7.44  
7.42  
7.42  
7.34  
7.34  
7.32  
7.32  
7.31  
7.30  
7.24  
7.23  
7.22  
7.22  
7.21  
7.19  
7.18  
7.17  
7.16  
7.15  
7.15  
7.13  
7.11  
7.09  
7.00  
7.00  
6.99  
6.98  
6.98  
6.97  
6.96  
4.56  
4.55  
2.37  
2.36

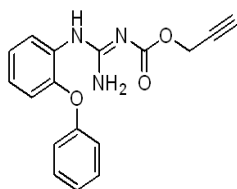

$^1\text{H NMR}$ :  $\text{CDCl}_3$ , 400 MHz

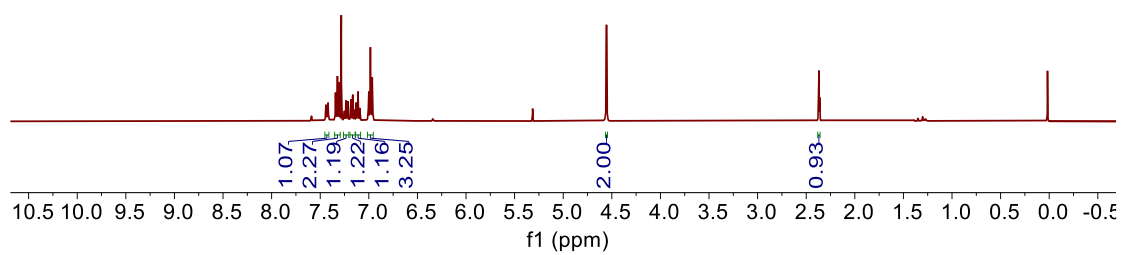

162.7  
160.3  
156.4  
151.4  
129.8  
128.0  
127.6  
127.4  
124.2  
123.8  
119.7  
118.6  
79.0  
73.7  
51.9

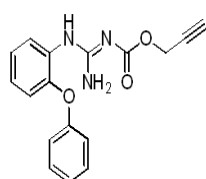

$^{13}\text{C}\{^1\text{H}\}$  NMR:  $\text{CDCl}_3$ , 101 MHz

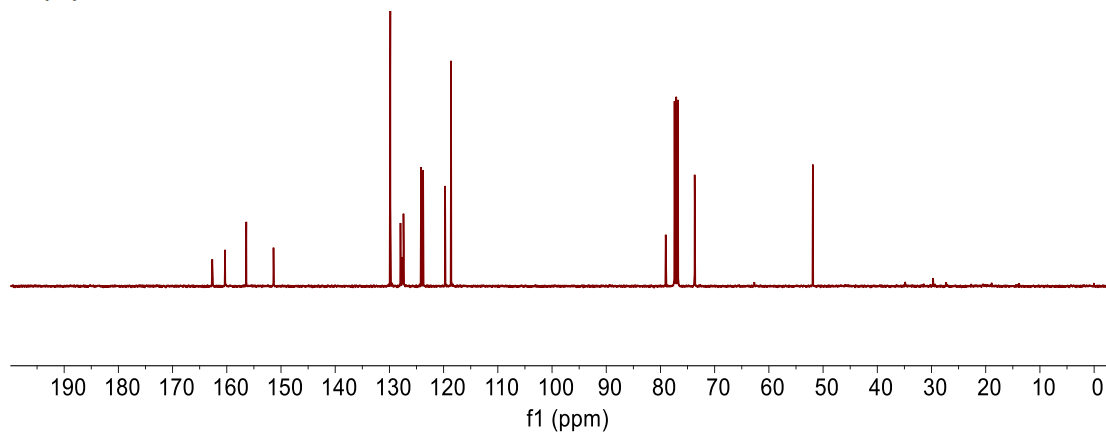

9.02  
7.89  
7.87  
7.41  
7.39  
7.38  
7.38  
7.37  
6.99  
6.98  
6.98  
6.97  
6.96  
6.95  
4.57  
4.56  
3.42  
3.42  
3.41

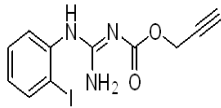

$^1\text{H}$  NMR:  $d_6$ -DMSO, 400 MHz

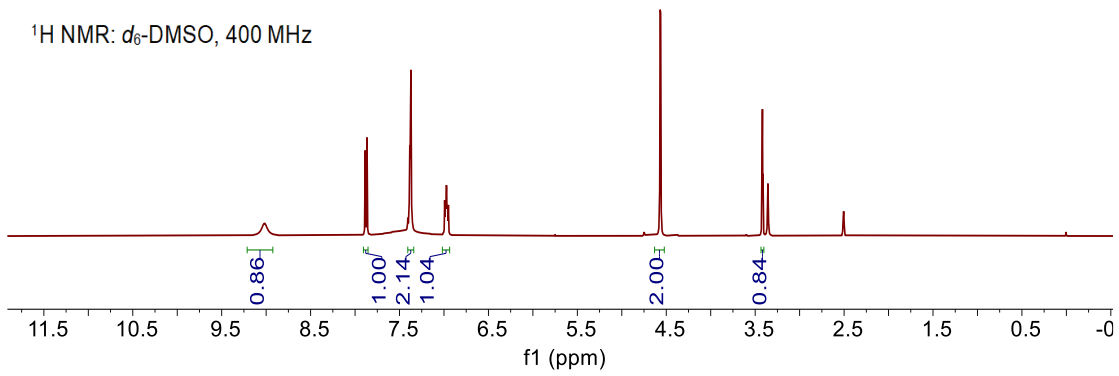

161.8  
158.7  
141.0  
139.3  
129.4  
128.1  
127.8  
97.8  
80.2  
77.1  
52.1

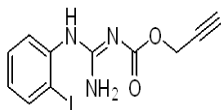

$^{13}\text{C}\{^1\text{H}\}$  NMR:  $d_6$ -DMSO, 101 MHz

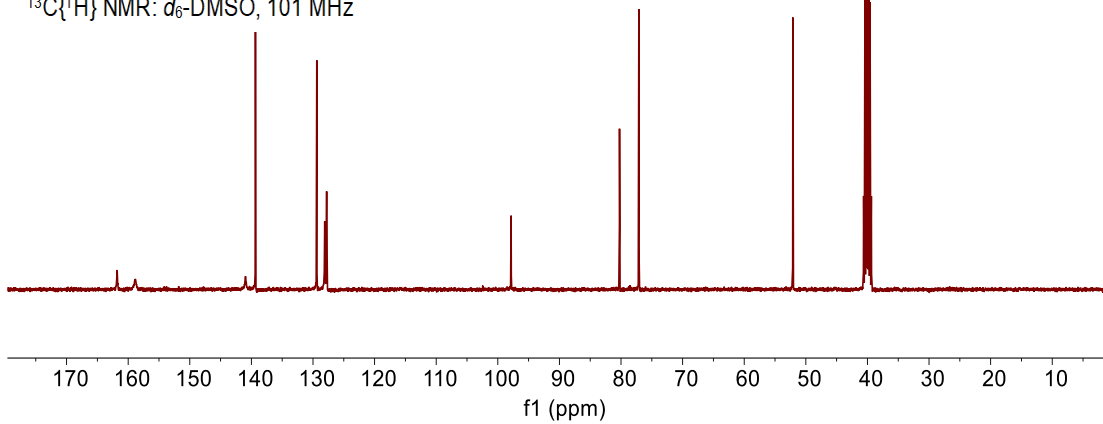

8.91  
7.66  
7.66  
7.64  
7.64  
7.58  
7.56  
7.38  
7.38  
7.37  
7.36  
7.35  
7.34  
7.14  
7.13  
7.12  
7.11  
7.10  
7.09  
4.57  
4.57  
3.44  
3.43  
3.43

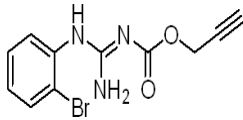

$^1\text{H NMR}$ :  $d_6$ -DMSO, 400 MHz

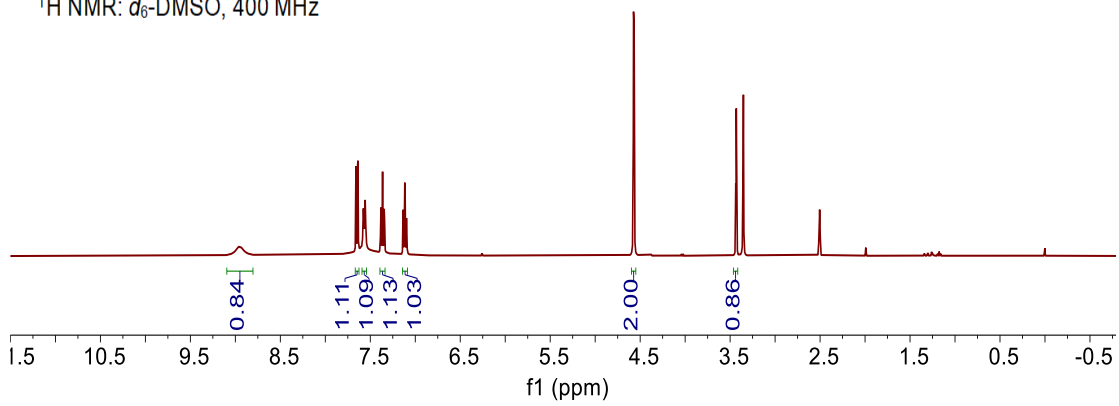

161.9  
159.0  
137.4  
133.1  
128.6  
128.2  
127.1  
119.1  
80.2  
77.1  
52.1

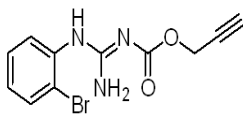

$^{13}\text{C}\{^1\text{H}\}$  NMR:  $d_6$ -DMSO, 101 MHz

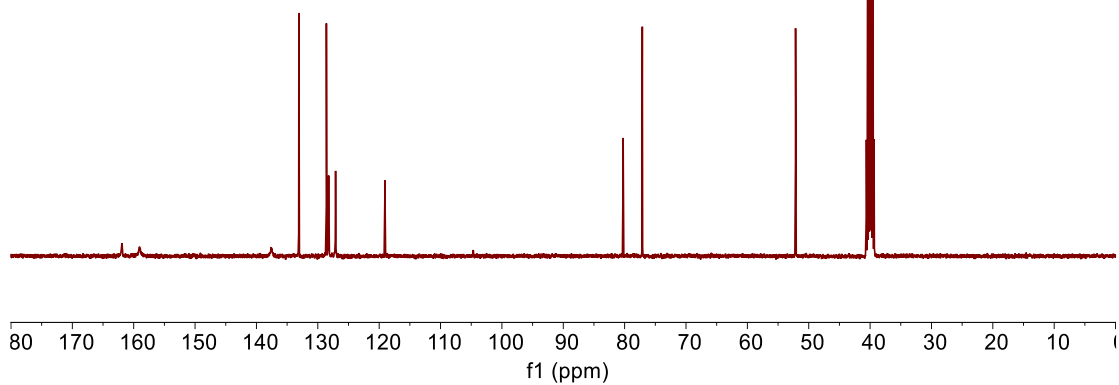



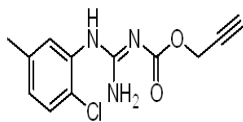

$^1\text{H}$  NMR:  $d_6$ -DMSO, 400 MHz

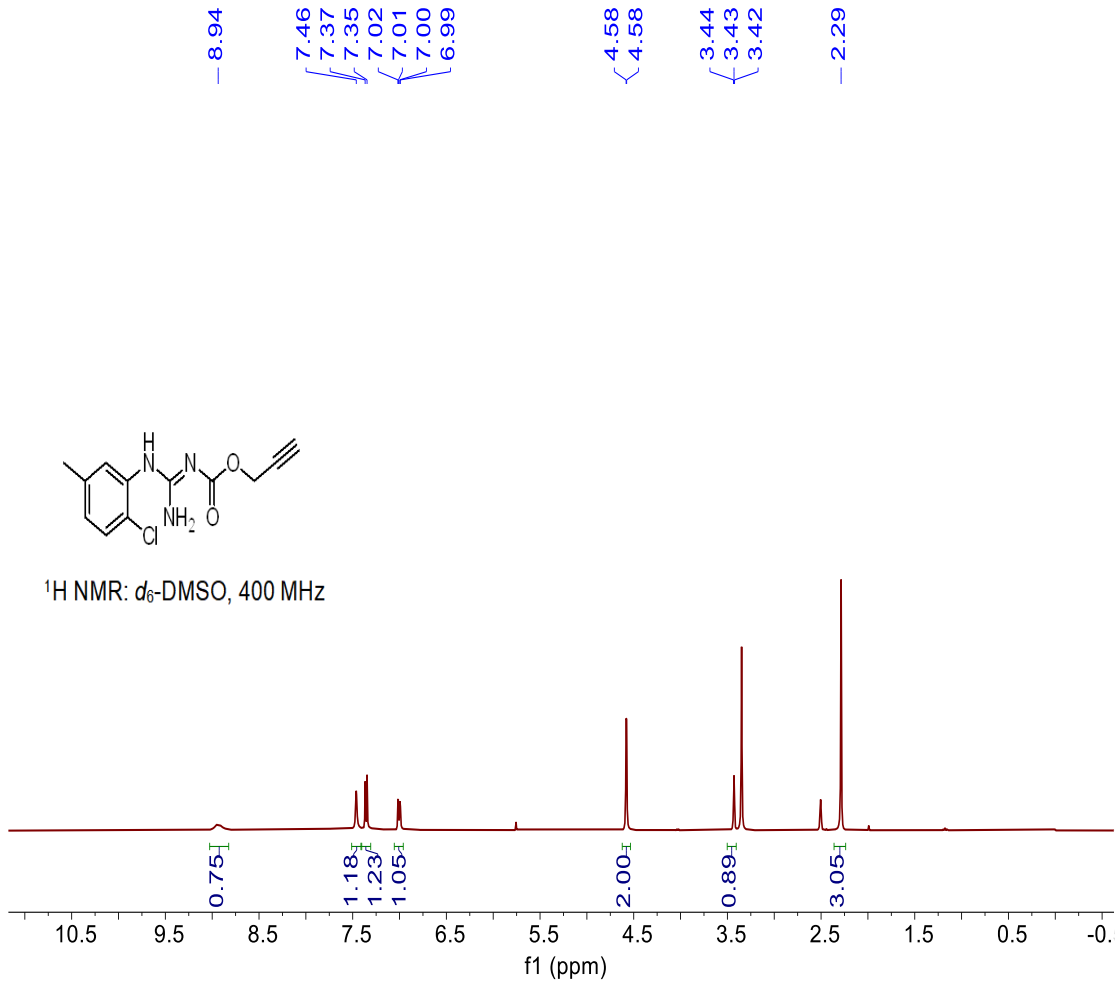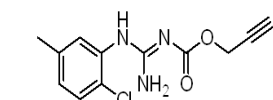

$^{13}\text{C}\{^1\text{H}\}$  NMR:  $d_6$ -DMSO, 101 MHz

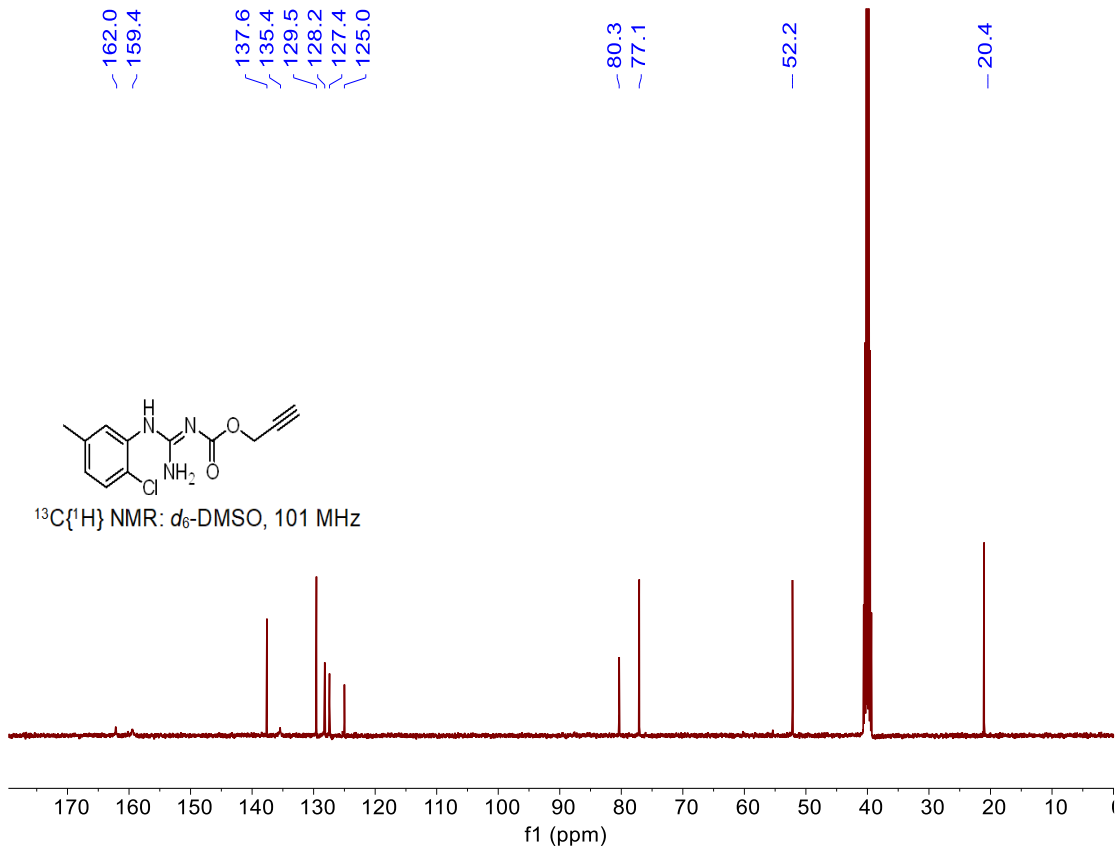



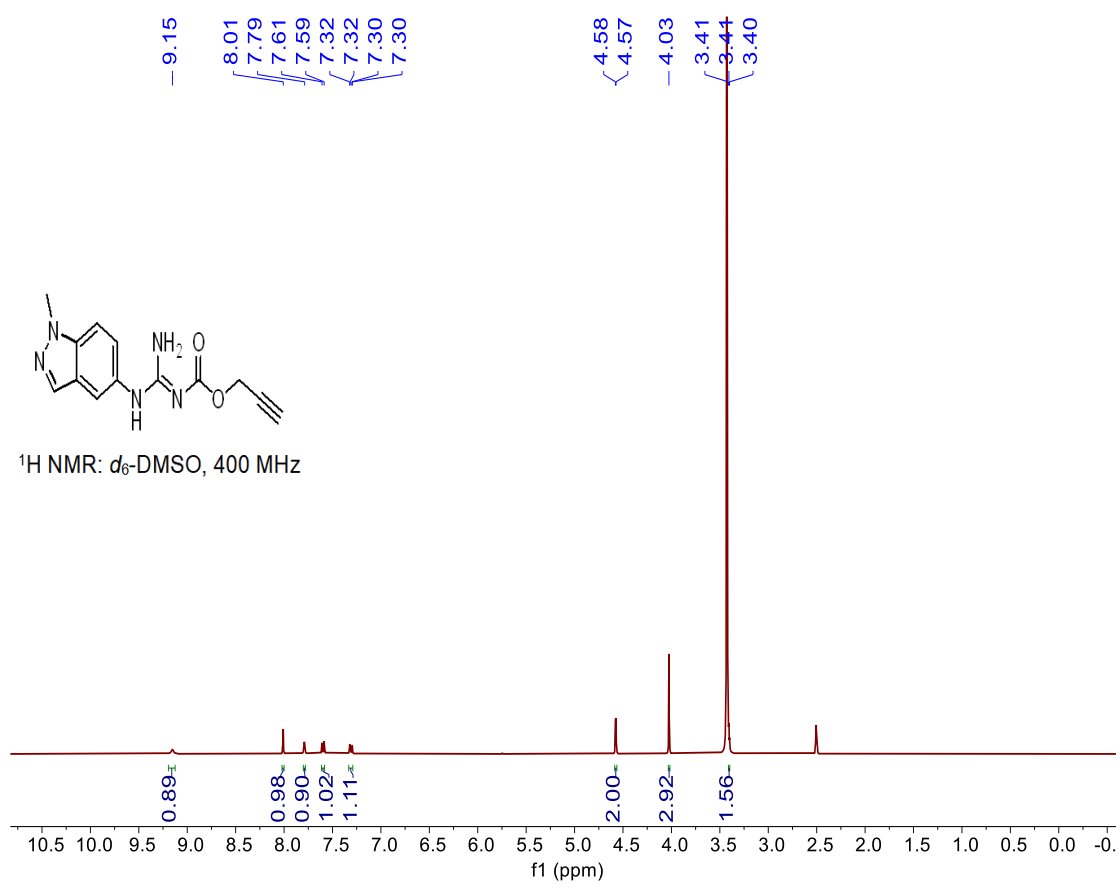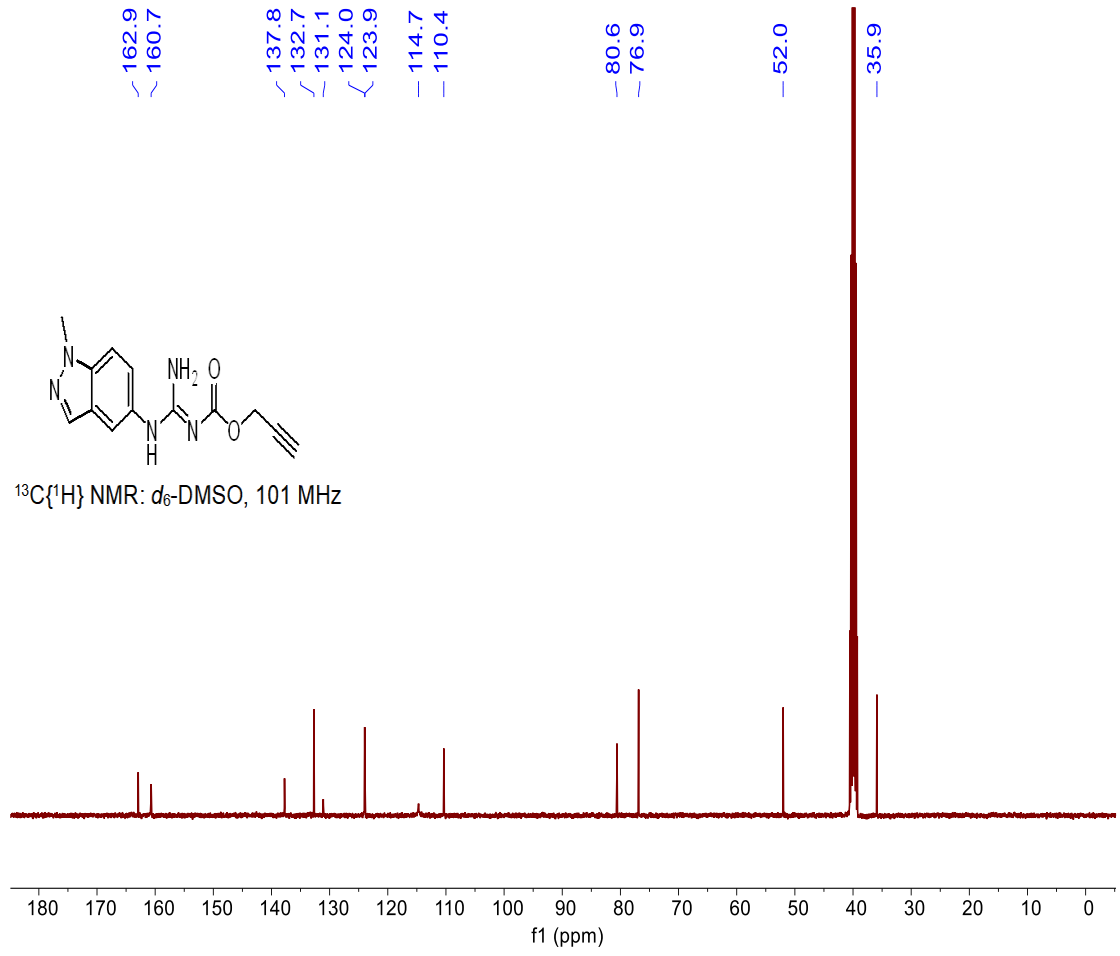

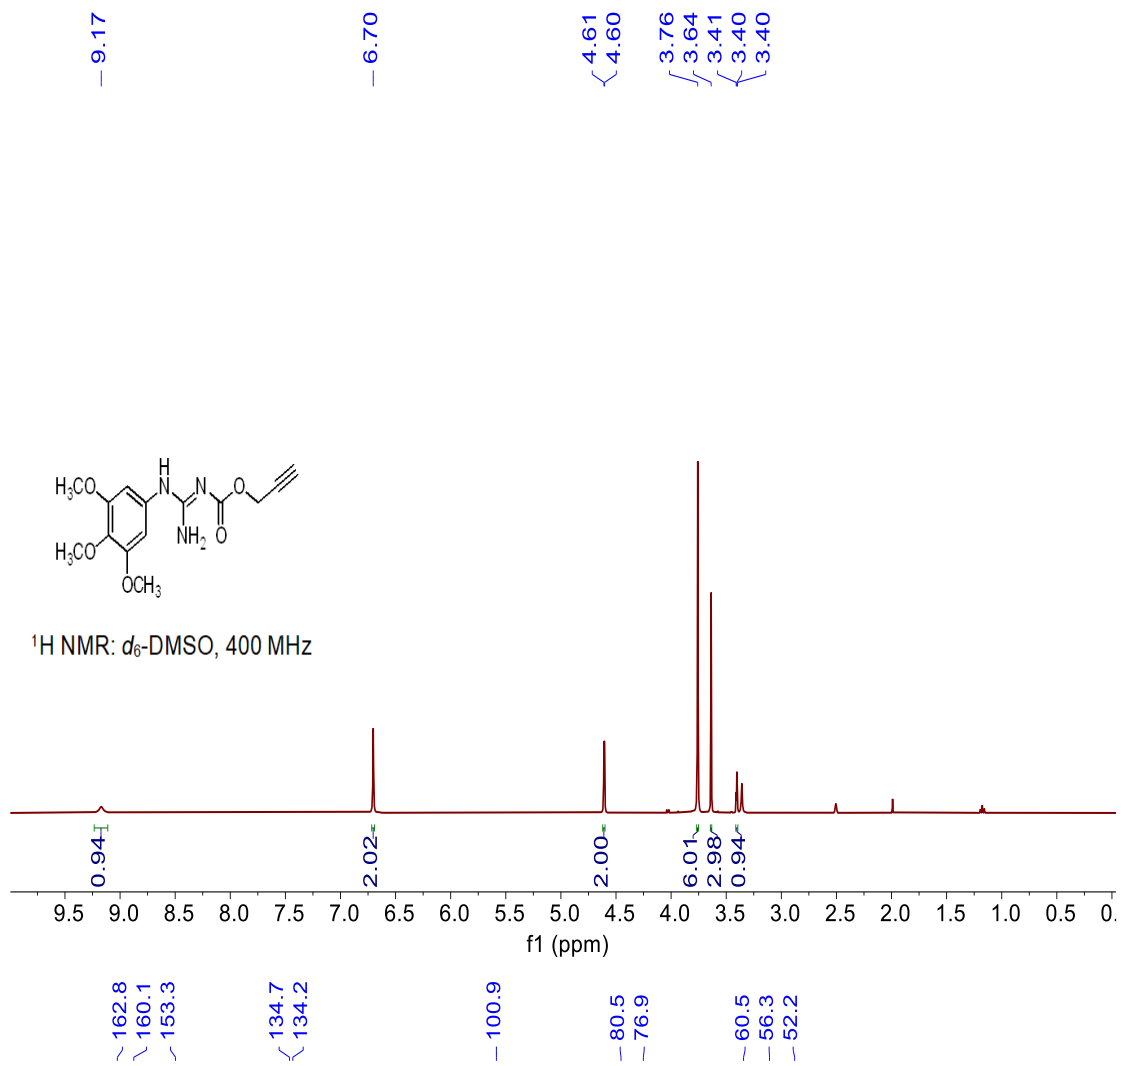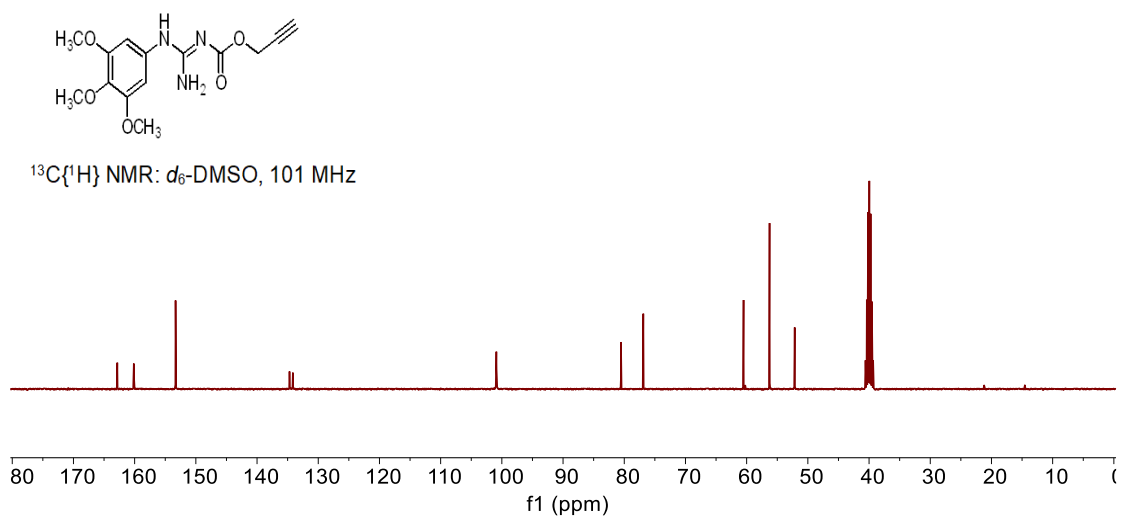

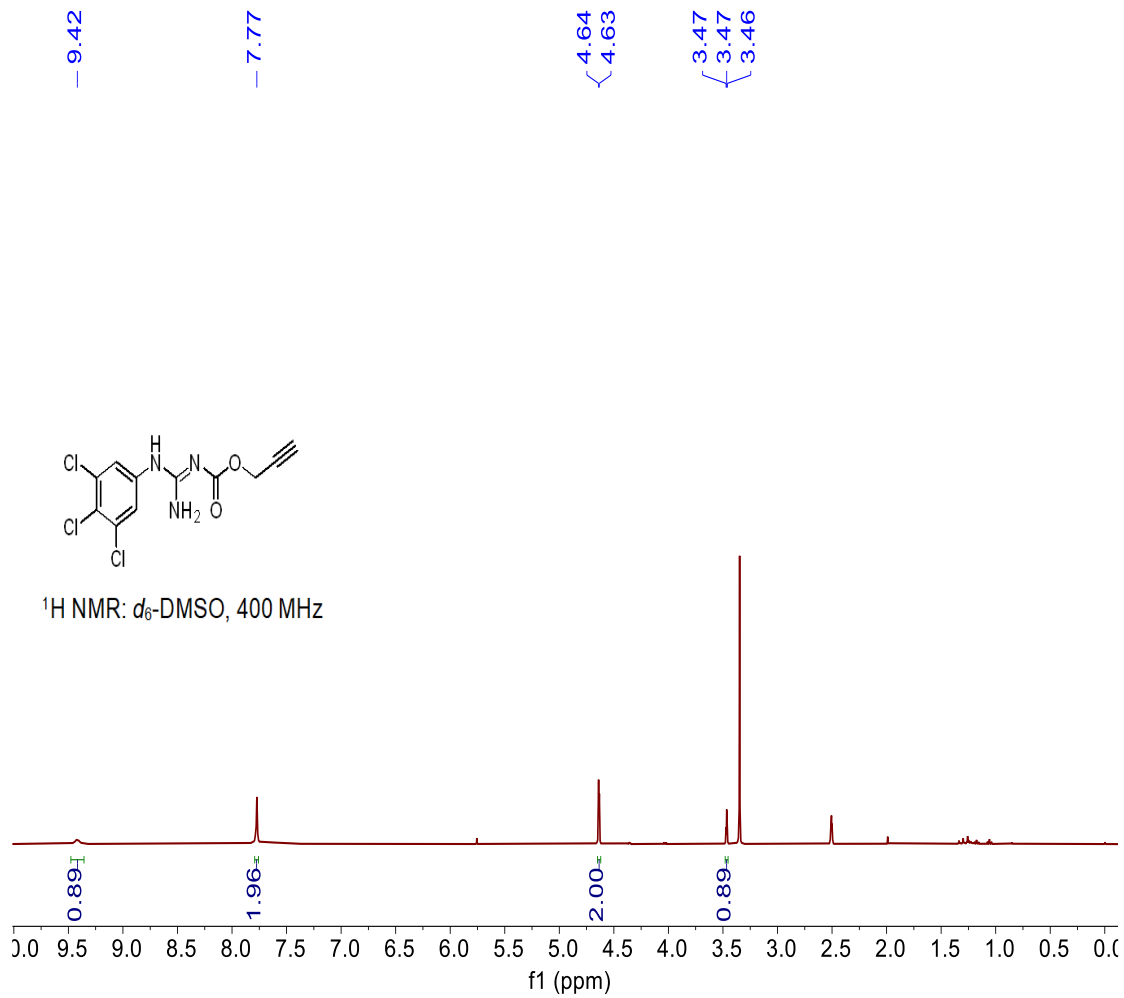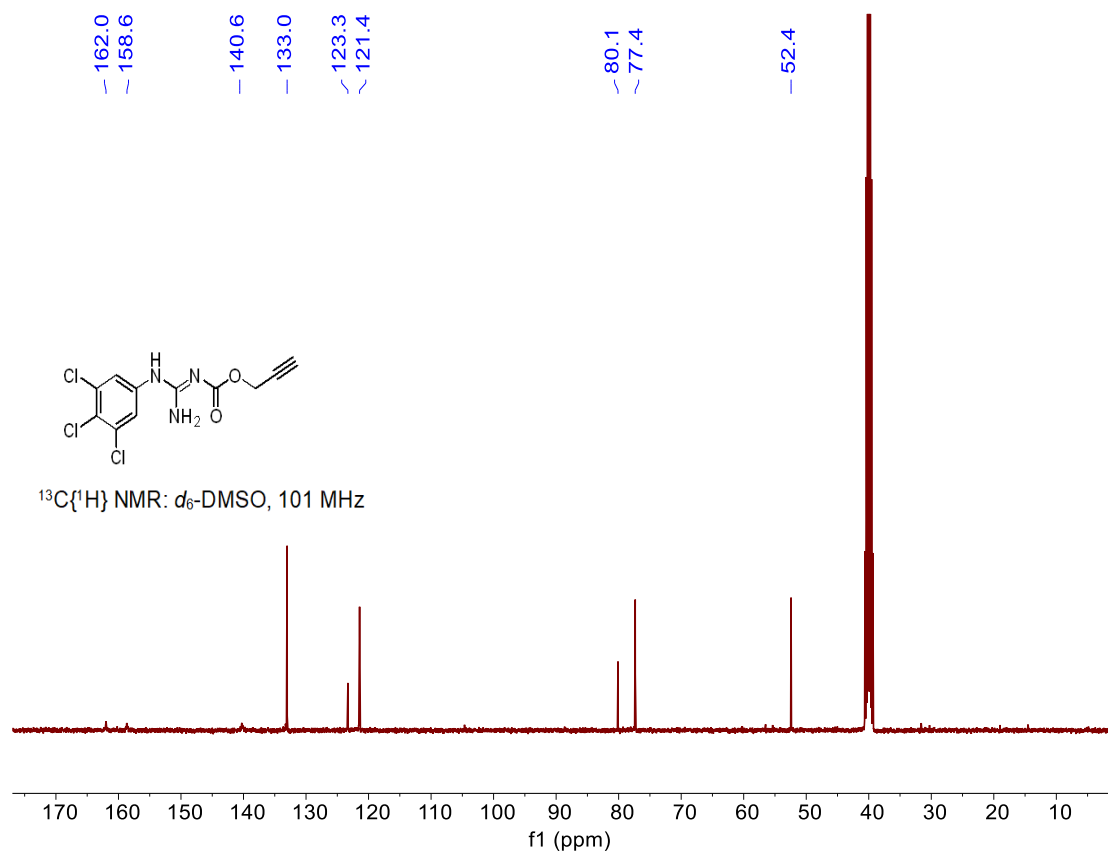

7.37  
7.37  
7.35  
7.35  
7.34  
7.34  
7.33  
7.09  
7.08  
7.07  
7.07  
7.06  
6.96  
6.95  
6.95  
6.94  
6.93  
6.10  
6.09  
6.09  
5.85  
4.96  
4.95  
4.95  
4.66  
4.65  
4.65

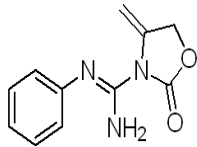

$^1\text{H}$  NMR:  $\text{CDCl}_3$ , 400 MHz

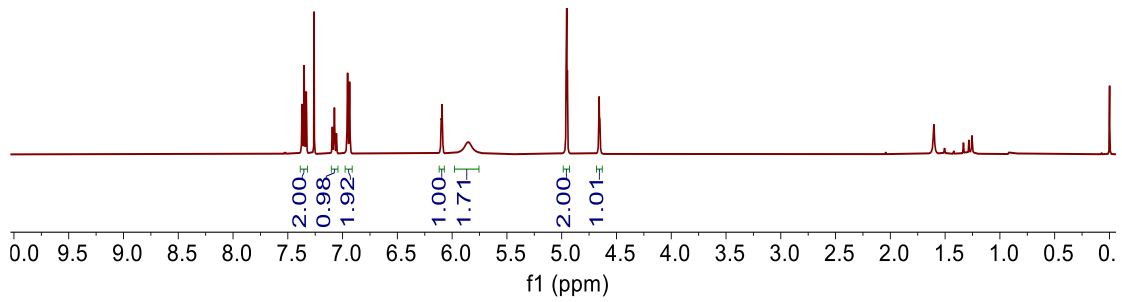

156.3  
146.9  
145.2  
135.7  
129.7  
123.4  
121.8  
93.4  
67.3

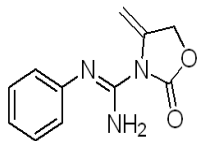

$^{13}\text{C}\{^1\text{H}\}$  NMR:  $\text{CDCl}_3$ , 101 MHz

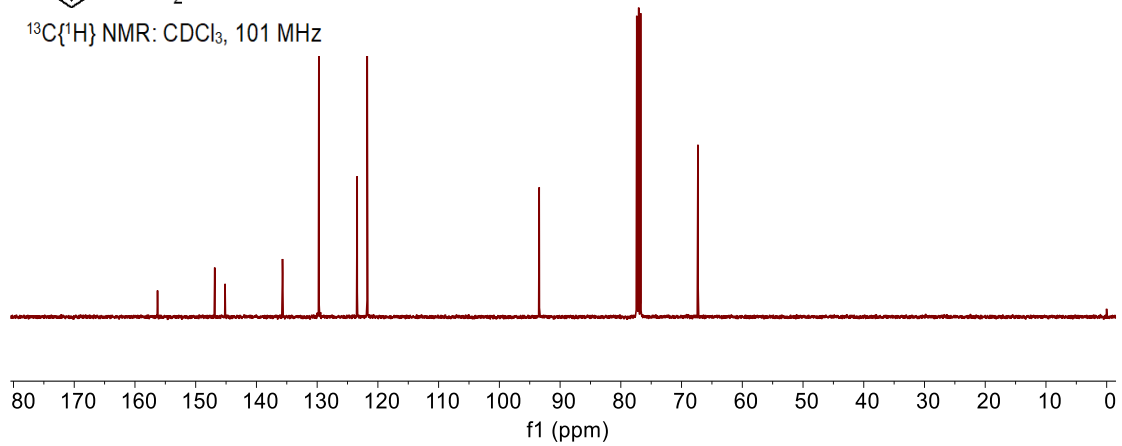

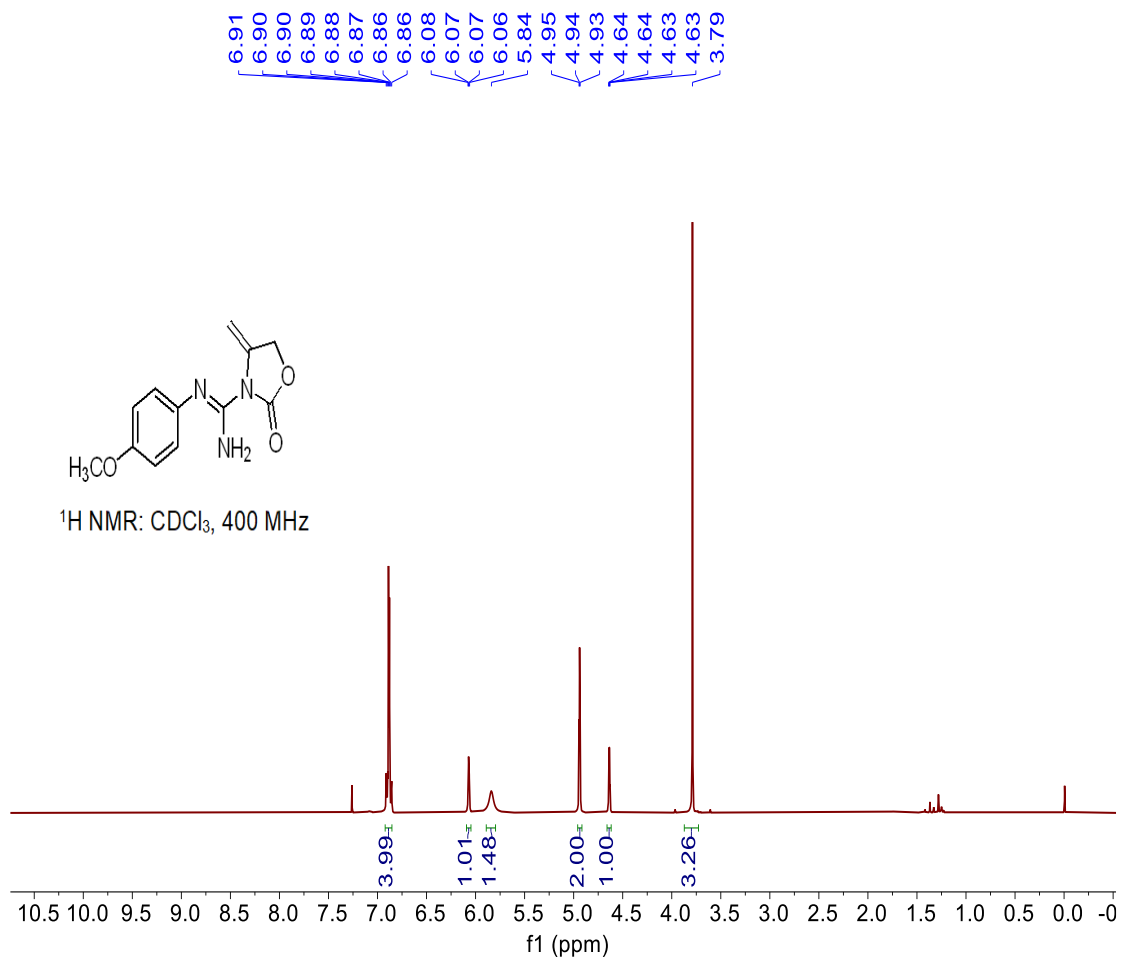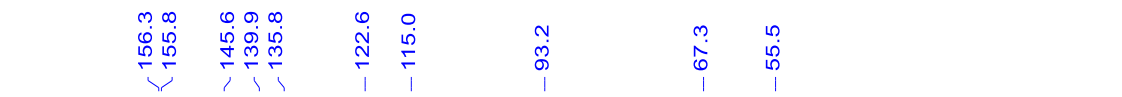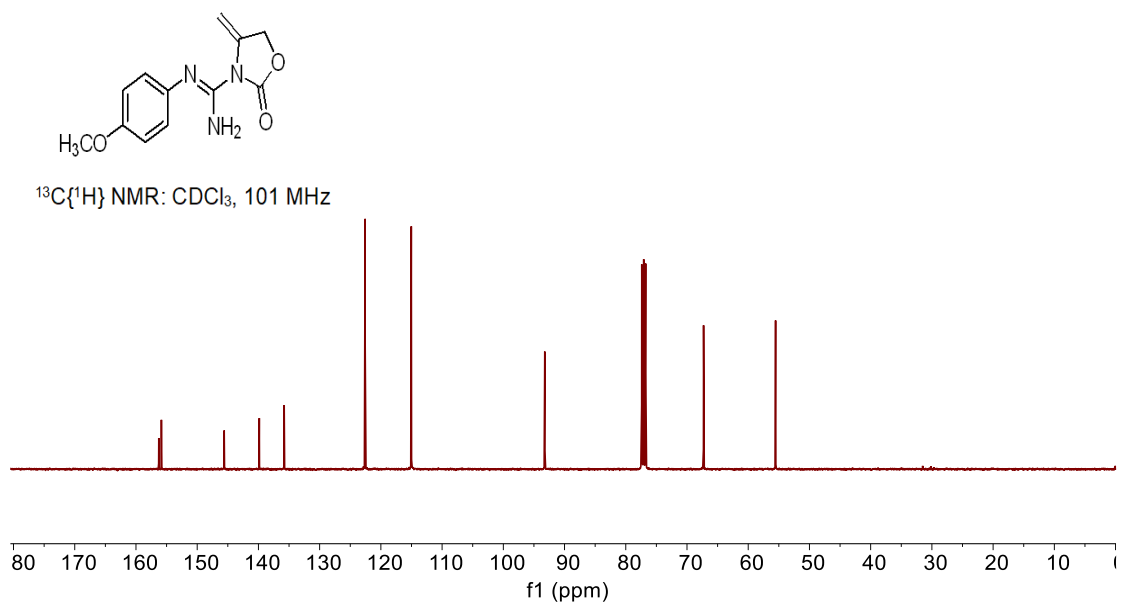

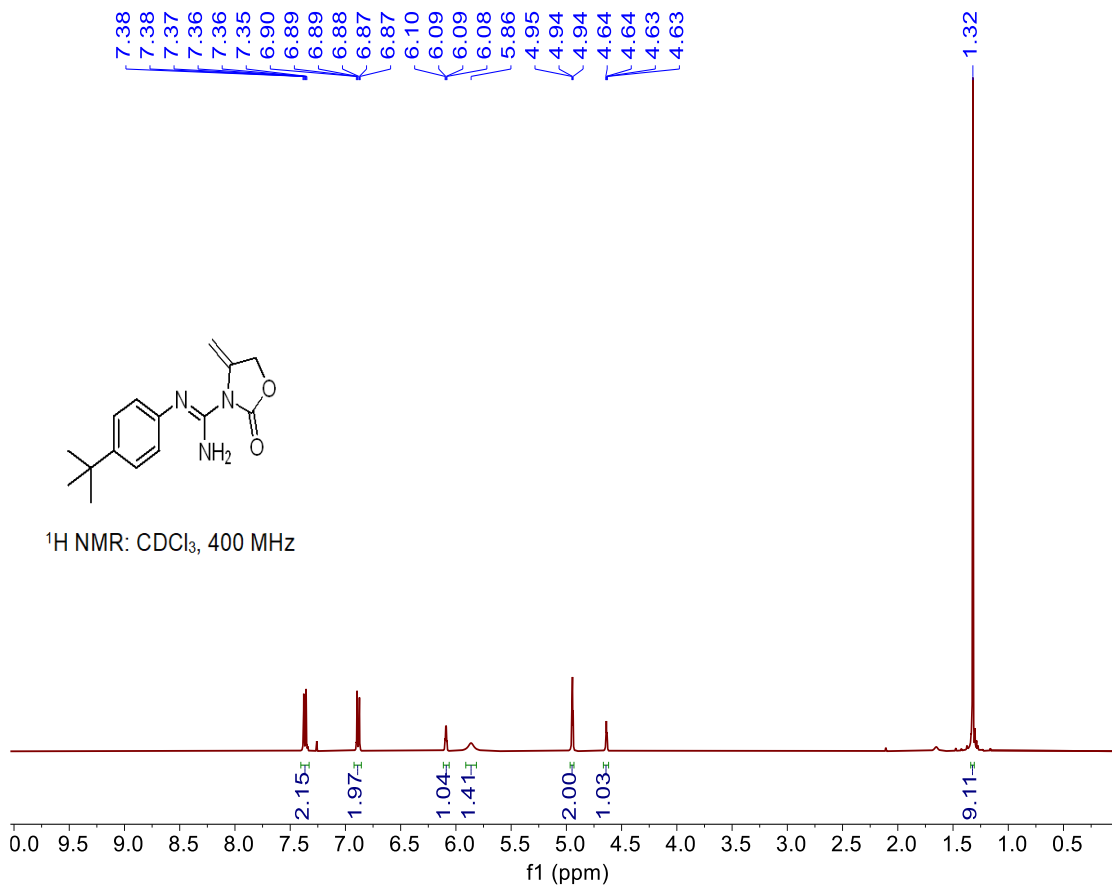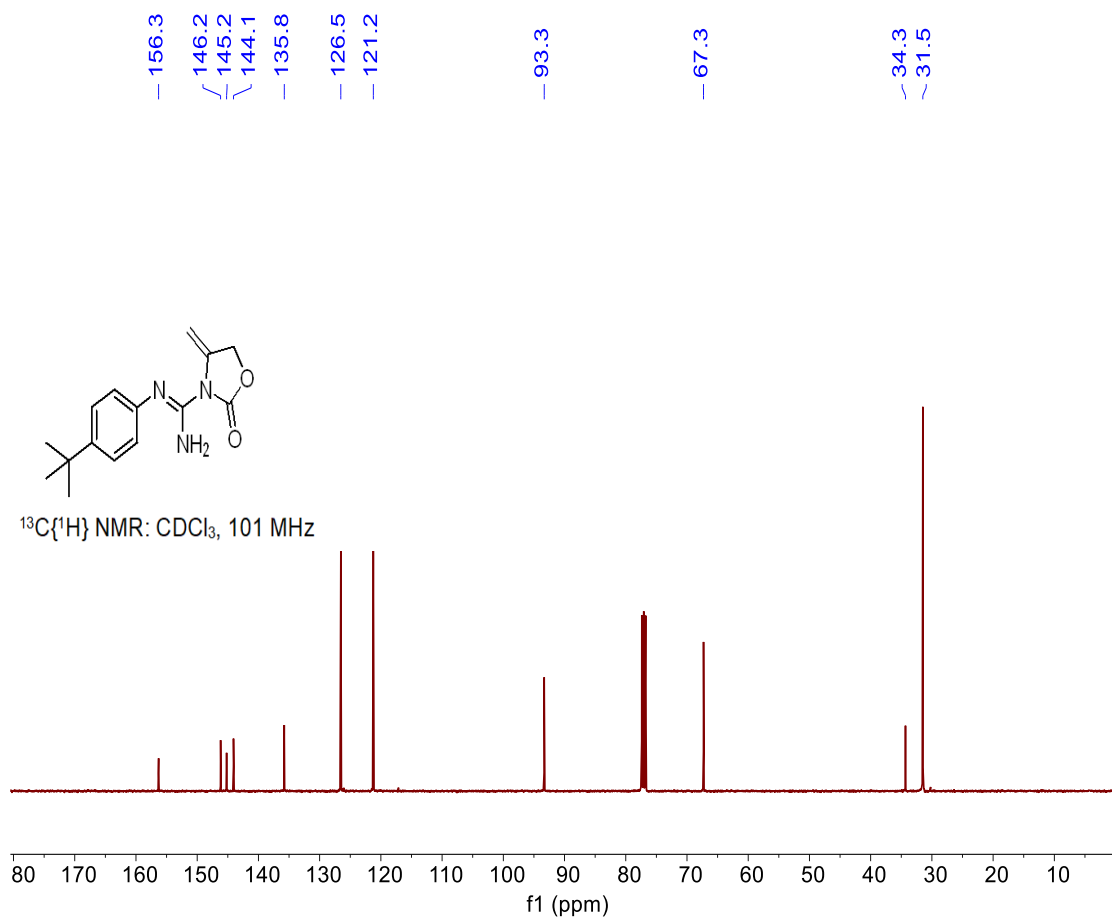



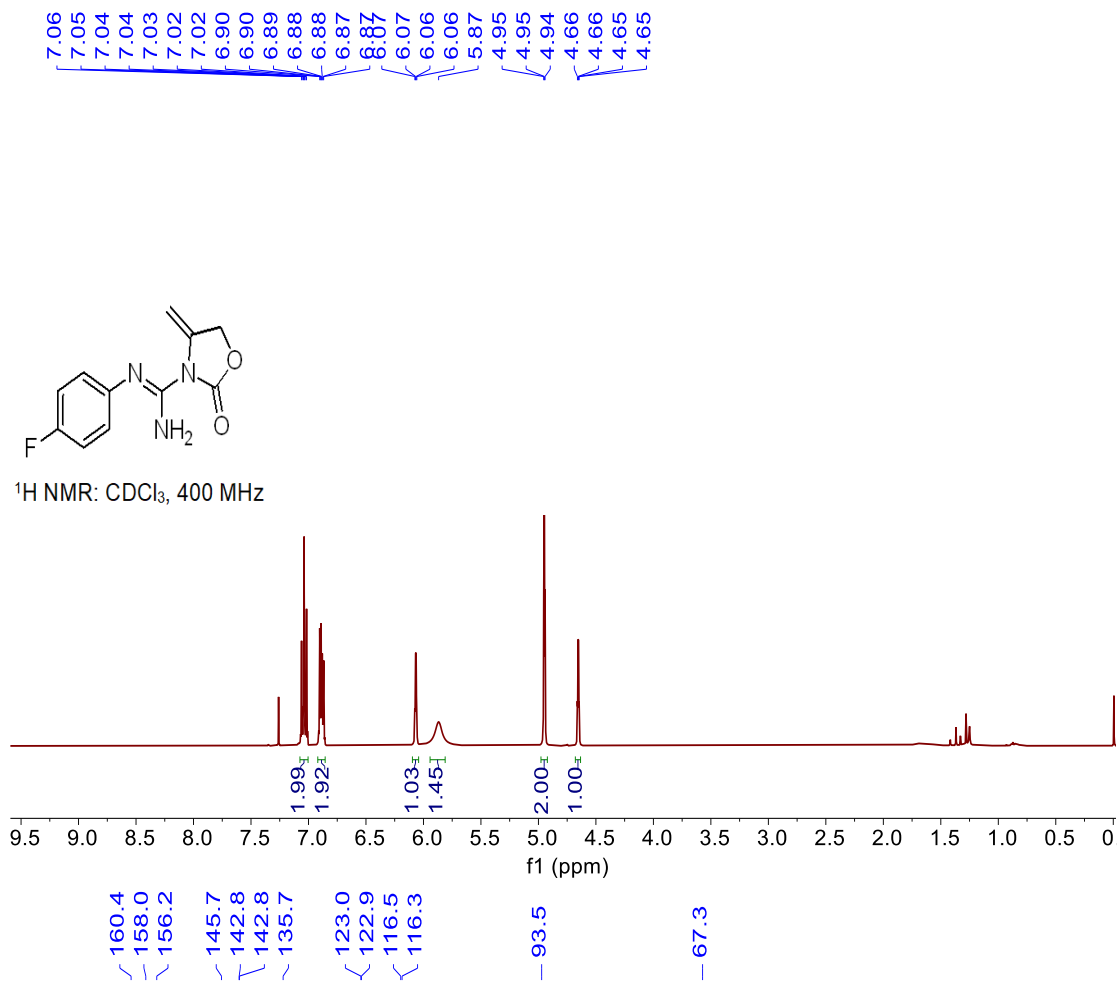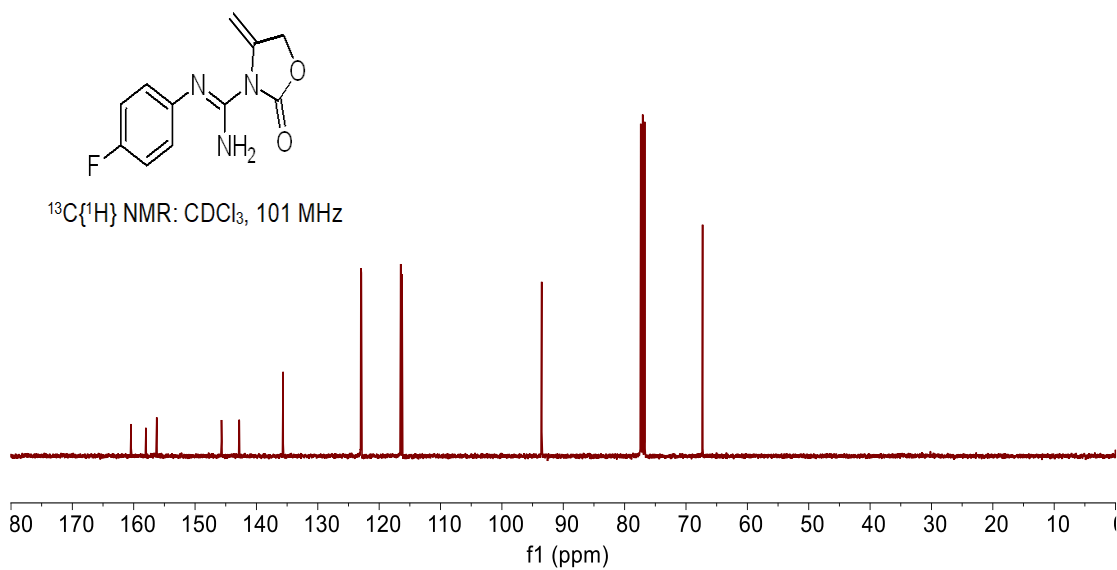

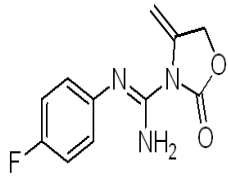

$^{19}\text{F}$  NMR:  $\text{CDCl}_3$ , 376 MHz

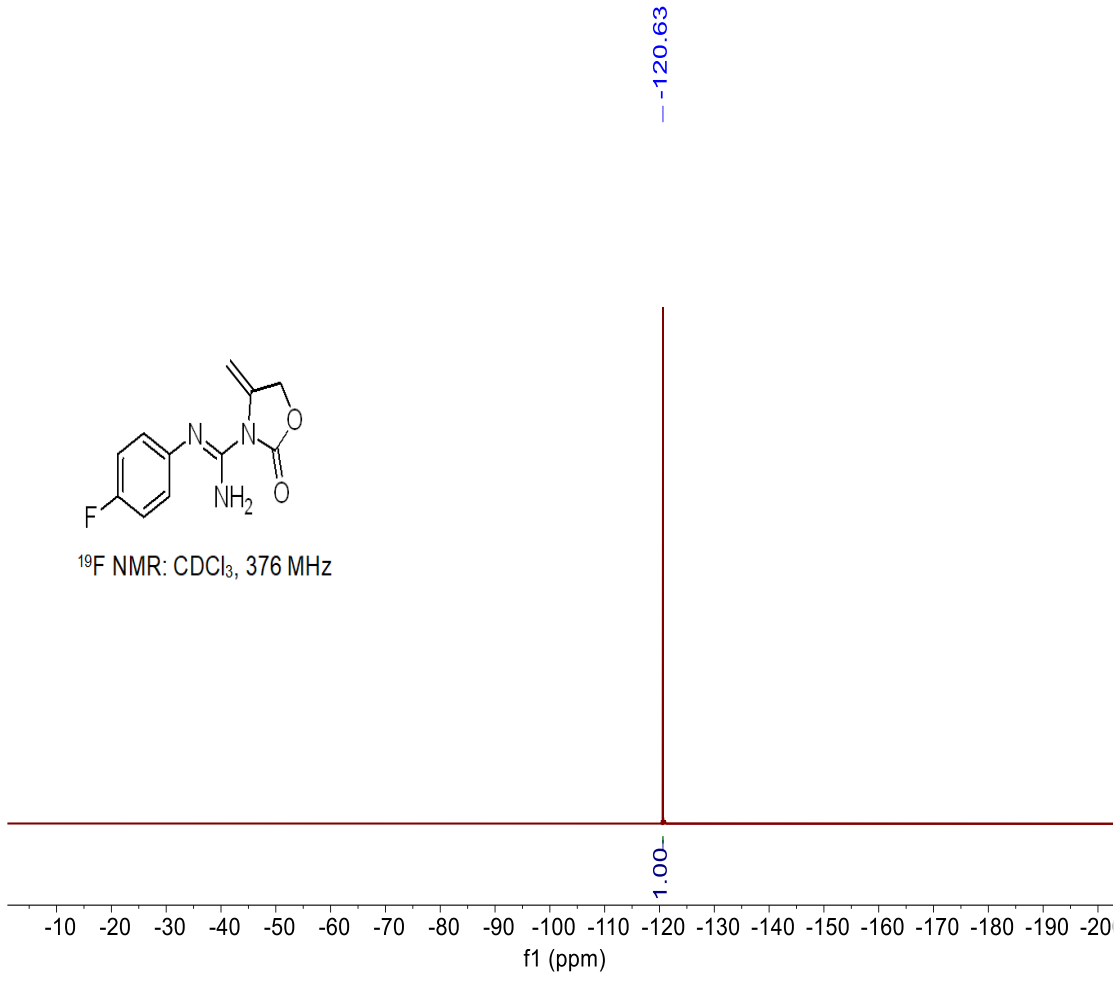

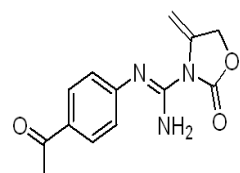

$^1\text{H NMR}$ :  $\text{CDCl}_3$ , 400 MHz

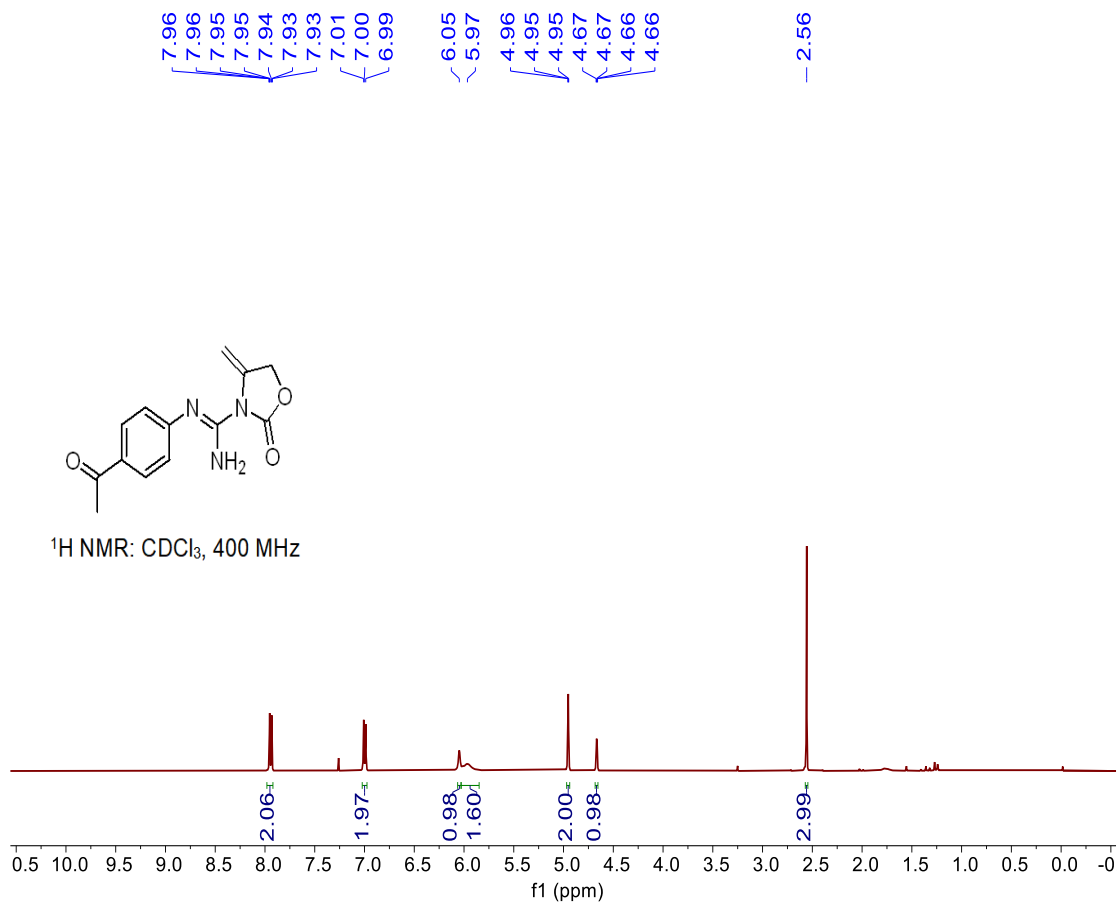

197.2, 156.1, 151.9, 144.9, 135.5, 132.5, 130.4, 121.9, 93.9, 67.3, 26.4

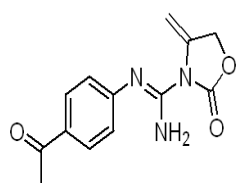

$^{13}\text{C}\{^1\text{H}\}$  NMR:  $\text{CDCl}_3$ , 101 MHz

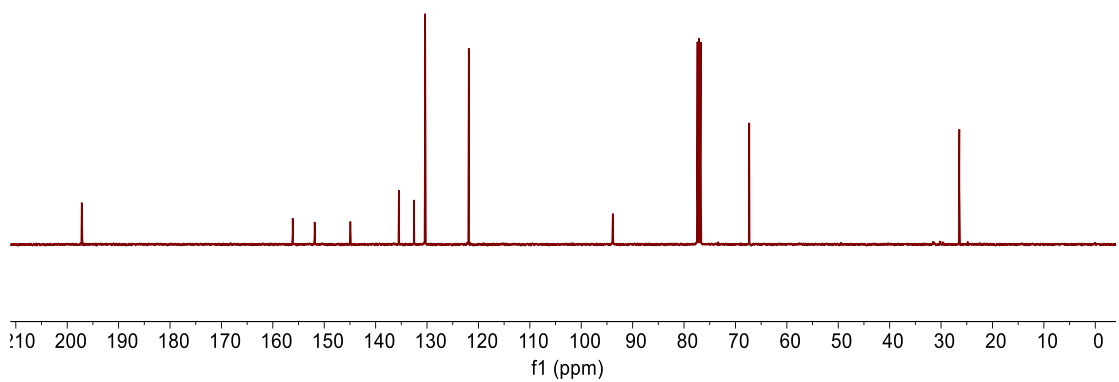

7.25  
7.25  
7.24  
7.24  
7.23  
7.22  
7.22  
7.18  
7.17  
7.16  
7.16  
7.15  
7.15  
7.14  
7.14  
7.08  
7.08  
7.07  
7.07  
7.04  
7.02  
7.01  
7.00  
7.00  
6.99  
6.99  
6.98  
6.98  
6.97  
6.97  
6.89  
6.89  
6.89  
6.88  
6.88  
6.87  
6.87  
5.90  
5.57  
5.56  
5.56  
5.55  
5.55  
4.83  
4.82  
4.82  
4.82  
4.36  
4.36  
4.35  
4.35

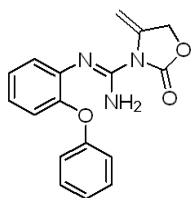

$^1\text{H NMR}$ :  $\text{CDCl}_3$ , 400 MHz

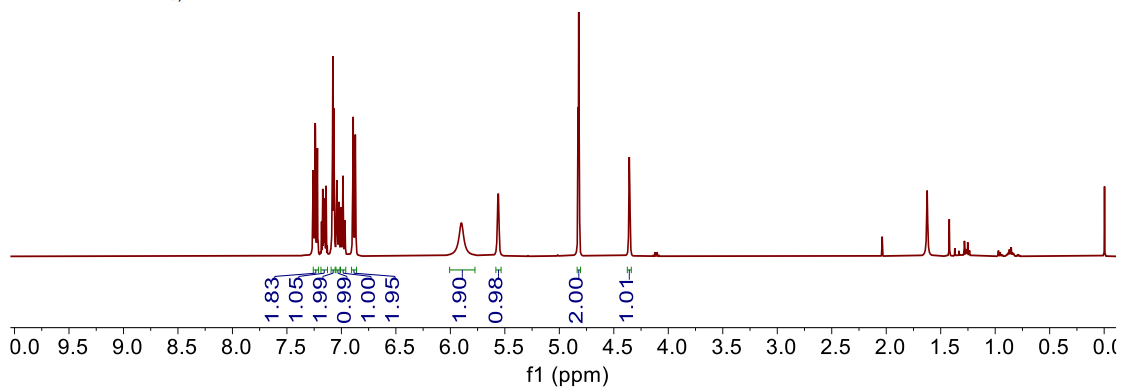

158.0  
156.1  
147.3  
144.8  
138.7  
135.1  
129.5  
125.4  
124.6  
123.8  
122.3  
121.9  
117.0  
- 93.4  
- 67.2

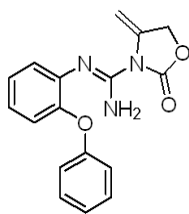

$^{13}\text{C}\{^1\text{H}\}$  NMR:  $\text{CDCl}_3$ , 101 MHz

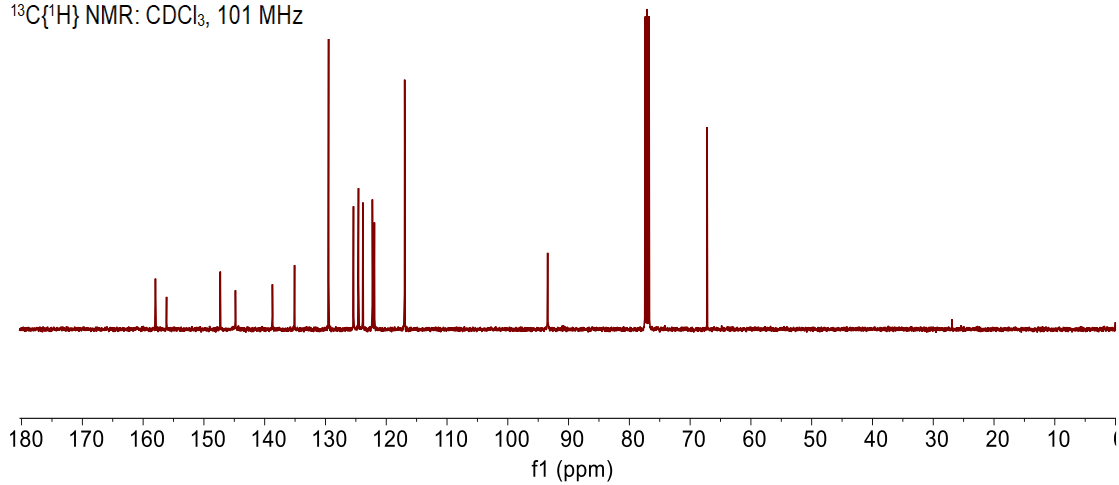

7.87  
7.87  
7.85  
7.85  
7.34  
7.33  
7.32  
7.31  
7.30  
7.29  
6.95  
6.95  
6.93  
6.93  
6.81  
6.80  
6.79  
6.78  
6.77  
6.77  
6.37  
6.37  
6.36  
6.36  
5.90  
4.97  
4.96  
4.96  
4.71  
4.71  
4.70  
4.70

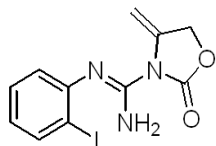

$^1\text{H NMR}$ :  $\text{CDCl}_3$ , 400 MHz

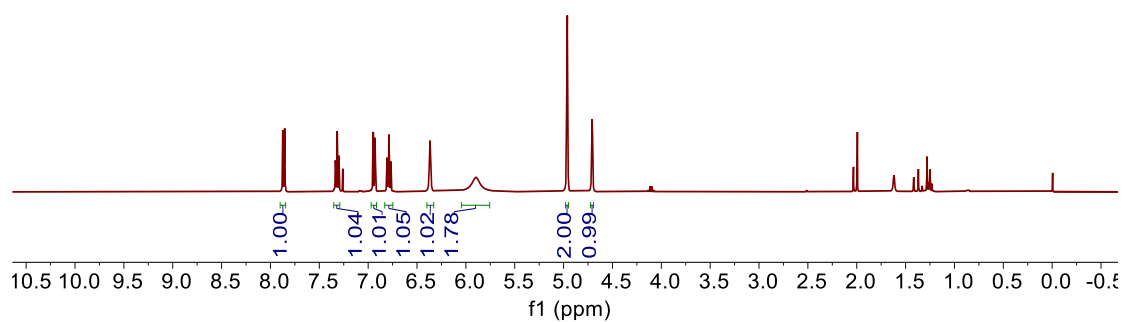

156.3  
148.7  
145.4  
139.7  
135.2  
129.6  
125.0  
121.7  
94.8  
93.1  
67.4

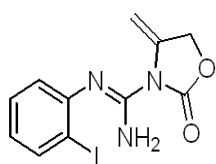

$^{13}\text{C}\{^1\text{H}\}$  NMR:  $\text{CDCl}_3$ , 101 MHz

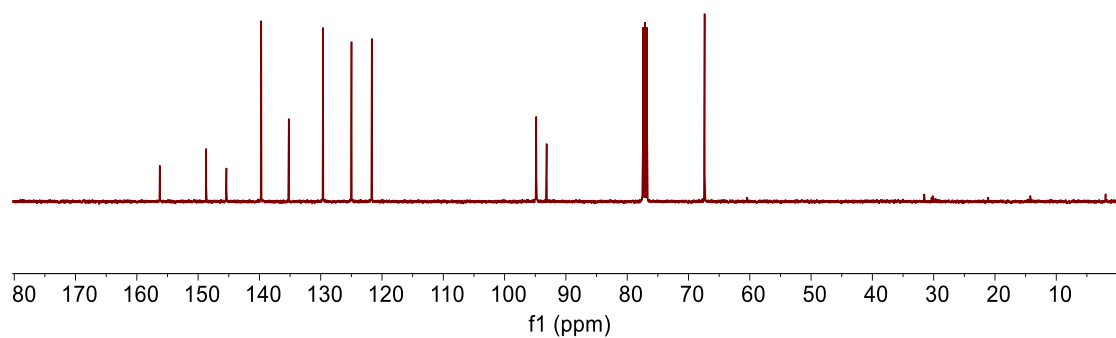

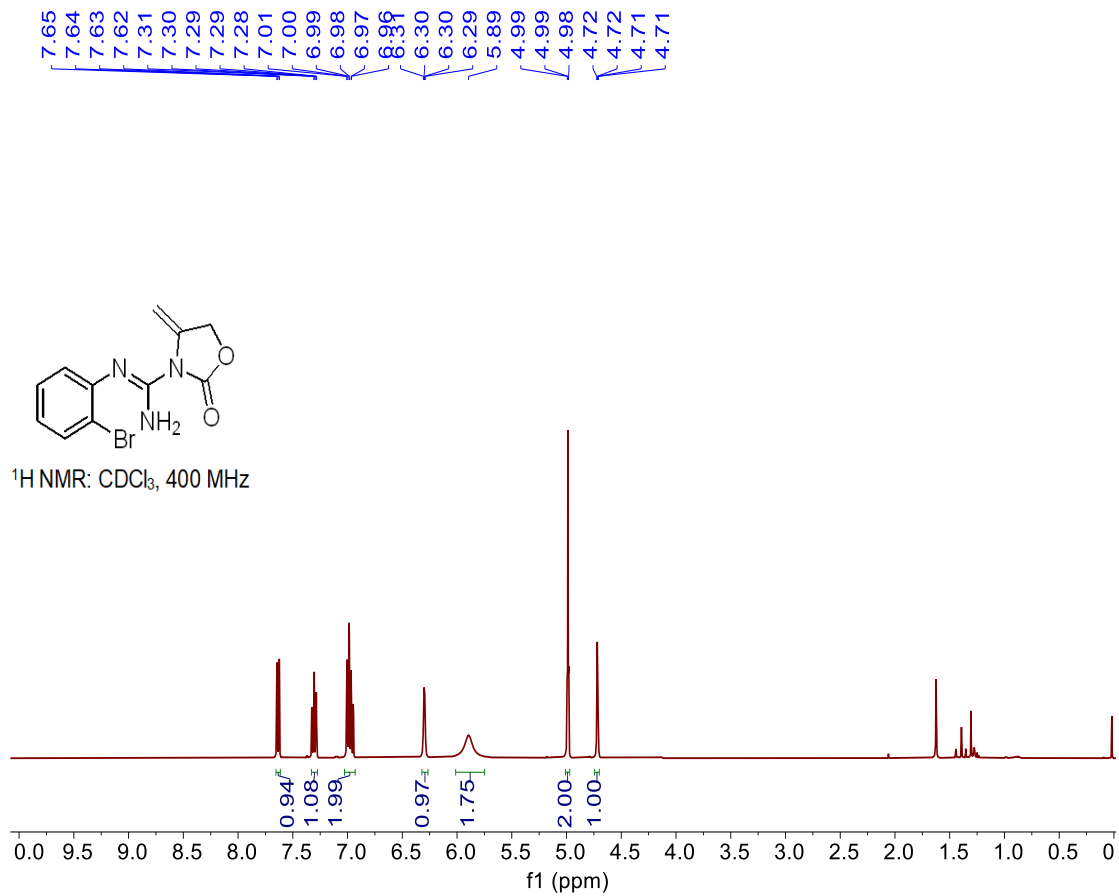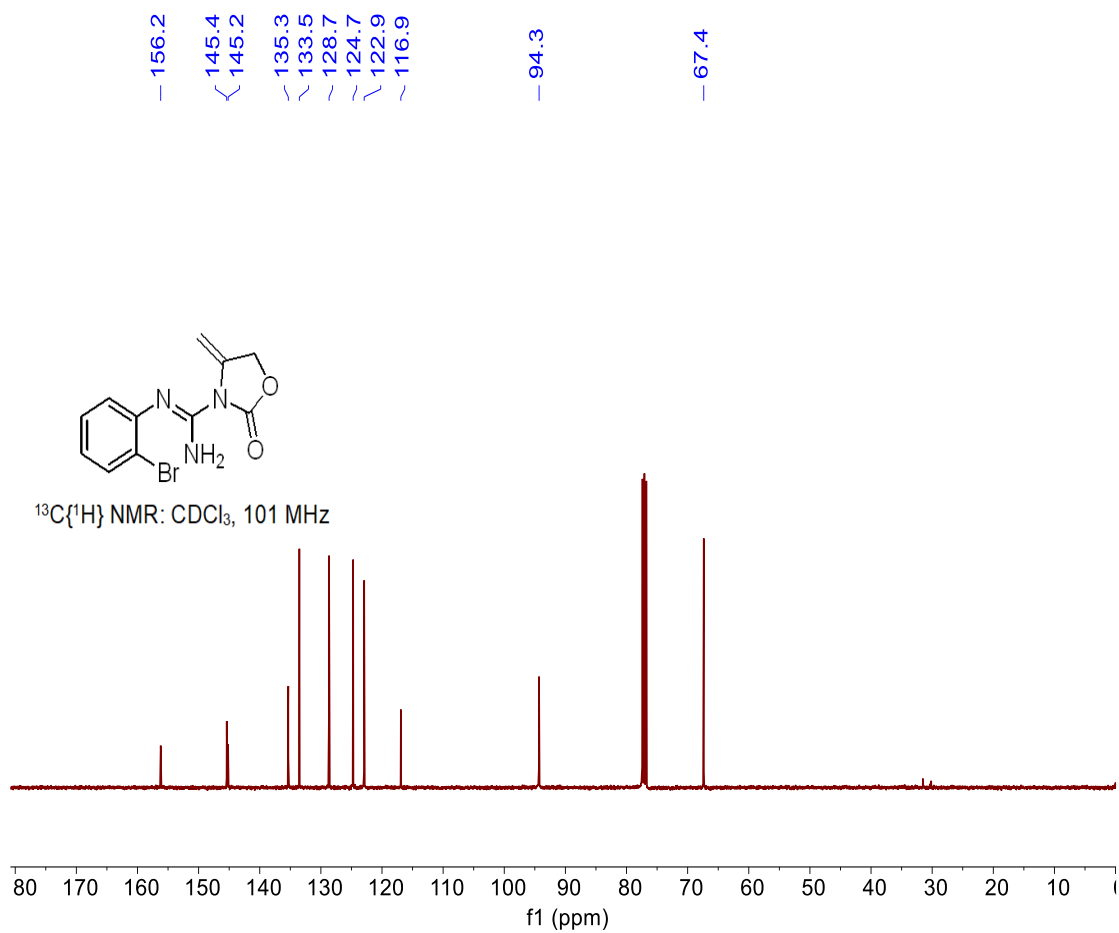

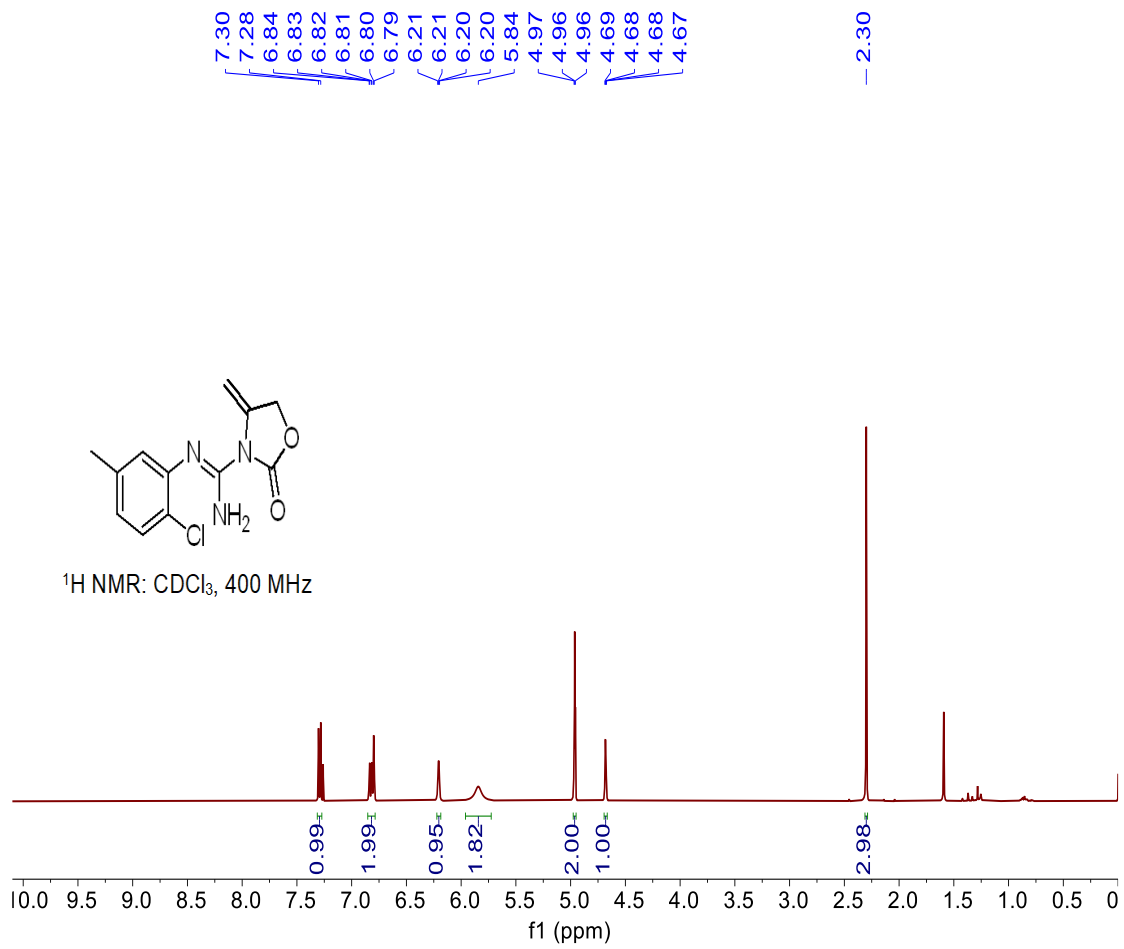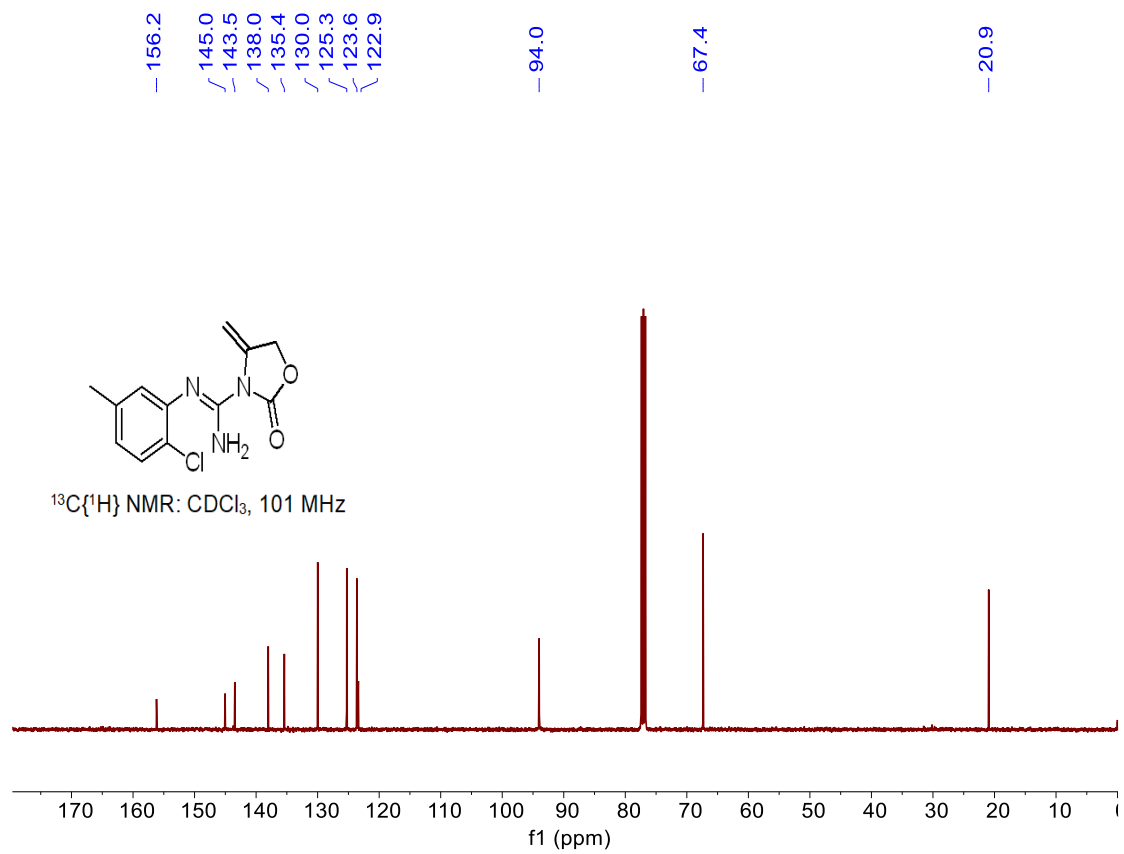

7.45  
7.43  
7.41  
7.35  
7.35  
7.34  
7.33  
7.22  
7.21  
7.19  
7.18  
7.17  
6.08  
5.97  
4.96  
4.95  
4.95  
4.68  
4.67  
4.66

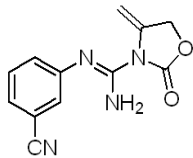

$^1\text{H NMR}$ :  $\text{CDCl}_3$ , 400 MHz

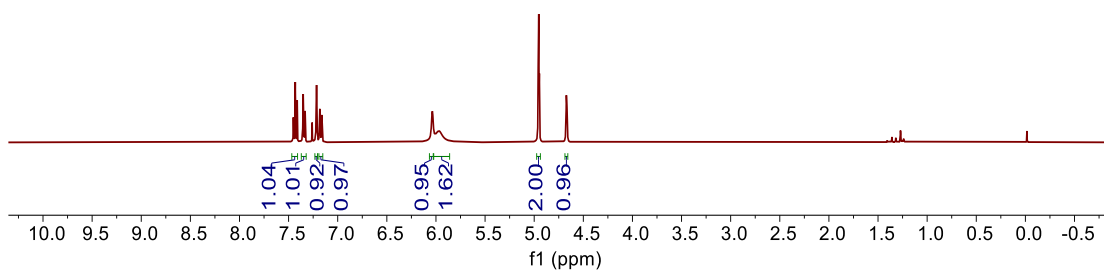

156.1  
147.8  
145.8  
135.4  
130.6  
126.9  
126.8  
125.4  
118.7  
113.6  
94.1  
67.3

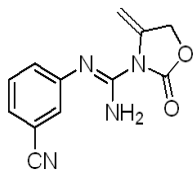

$^{13}\text{C}\{^1\text{H}\}$  NMR:  $\text{CDCl}_3$ , 101 MHz

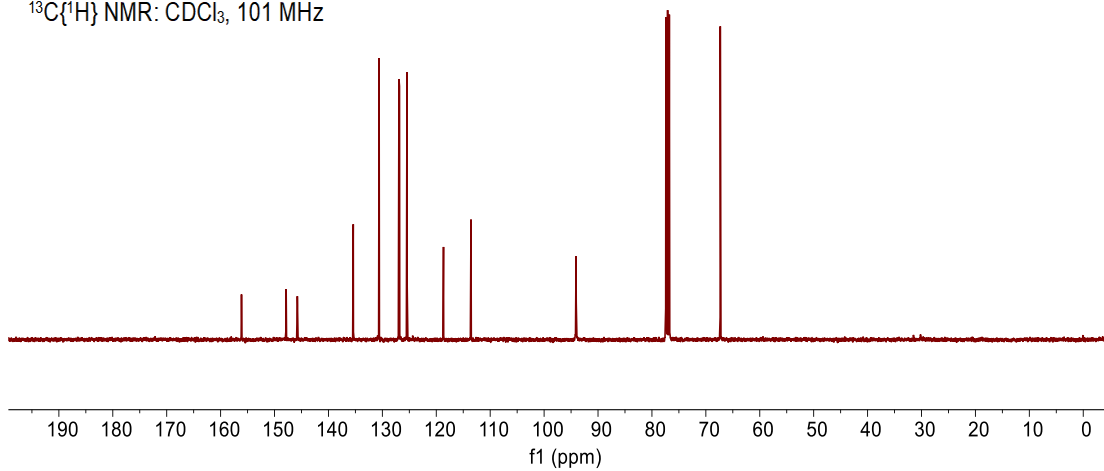



7.84  
7.36  
7.34  
7.21  
7.20  
7.03  
7.03  
7.01  
7.01  
6.09  
5.91  
4.94  
4.93  
4.93  
4.65  
4.65  
4.64  
4.64  
4.02

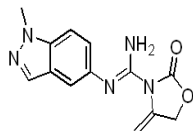

$^1\text{H NMR}$ :  $\text{CDCl}_3$ , 400 MHz

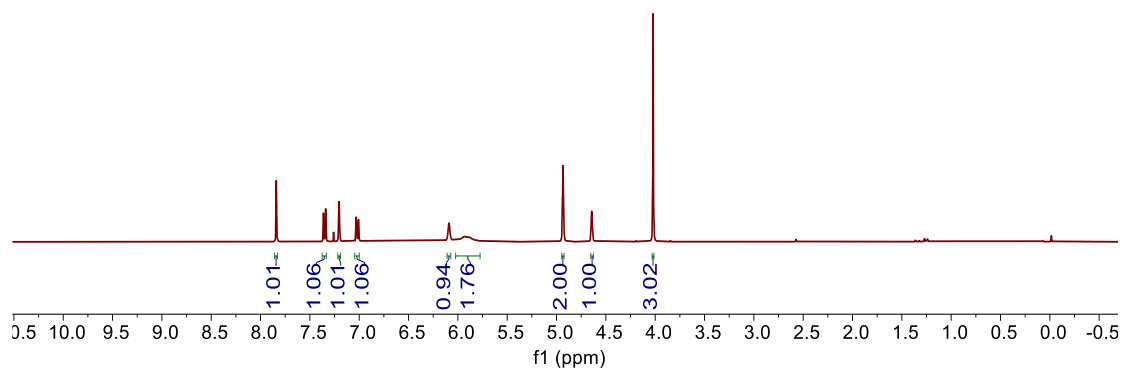

156.2  
145.9  
140.0  
137.3  
135.8  
132.0  
124.8  
122.7  
111.5  
110.2  
93.2  
67.3  
35.6

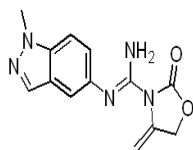

$^{13}\text{C}\{^1\text{H}\}$  NMR:  $\text{CDCl}_3$ , 101 MHz

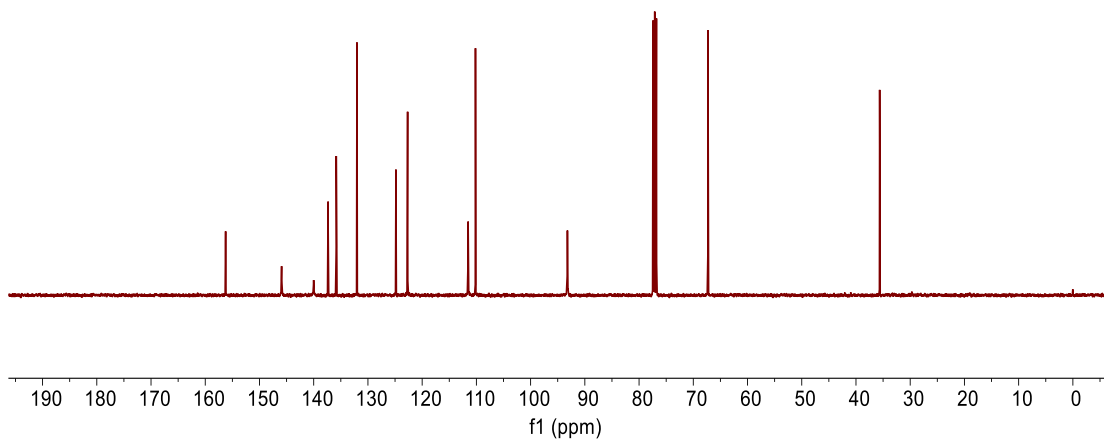

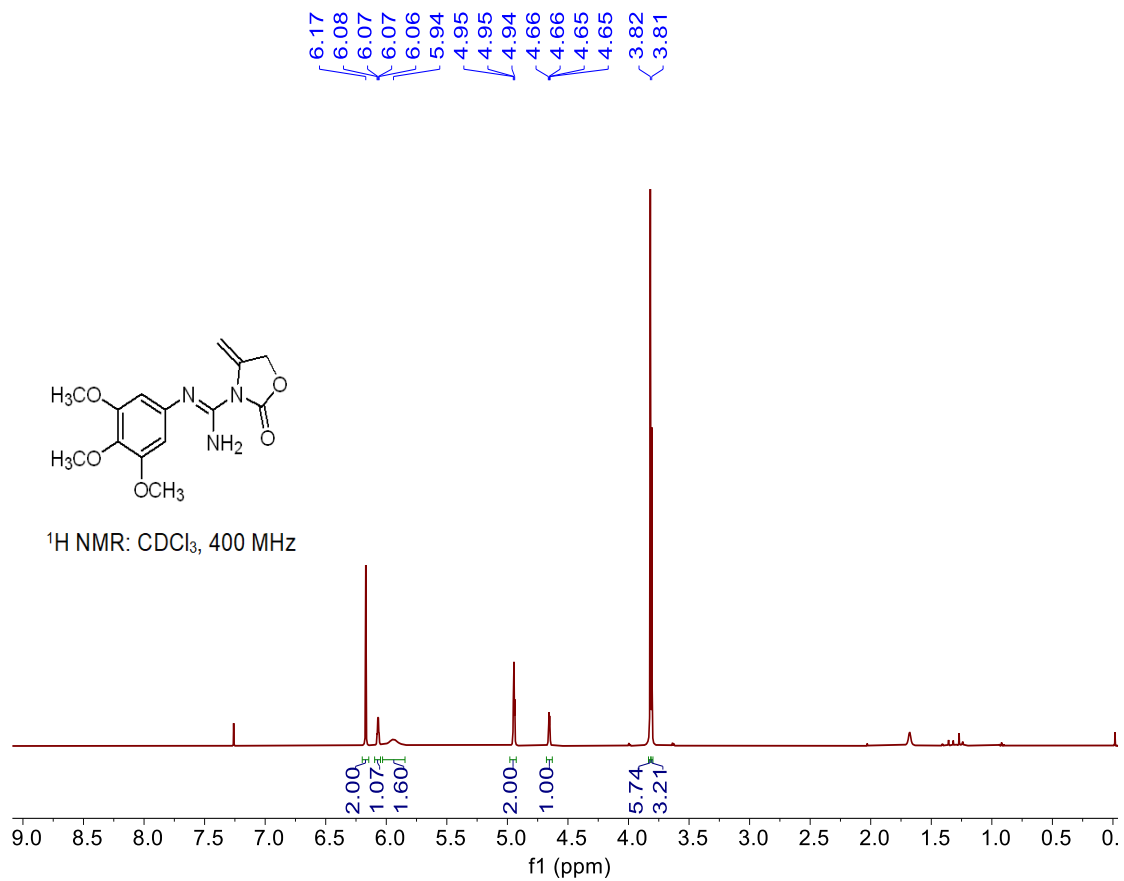

156.2  
 154.1  
 145.7  
 143.0  
 135.7  
 133.9  
 99.1  
 93.5  
 67.3  
 61.0  
 56.1

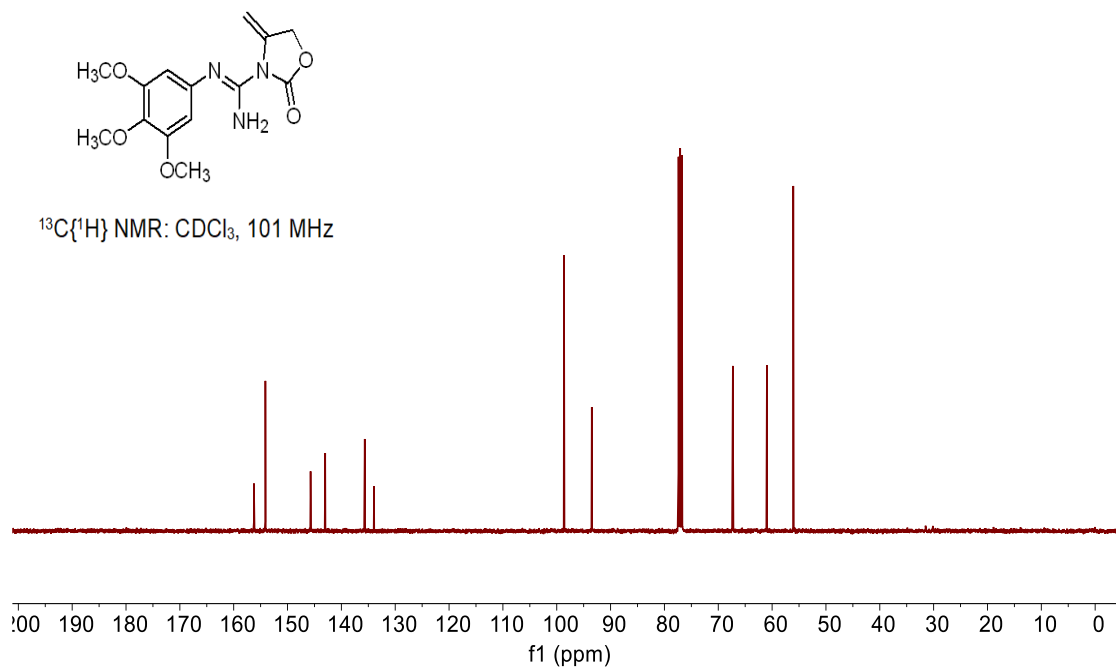

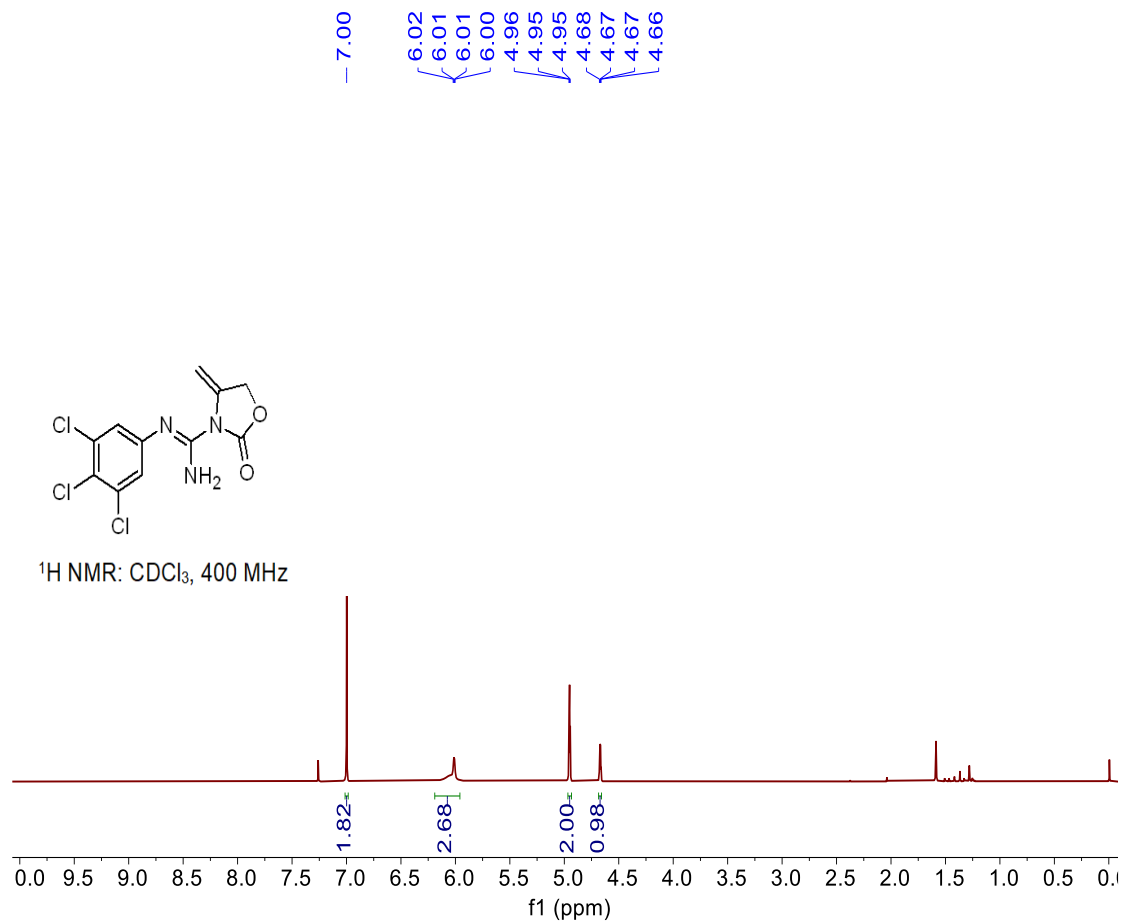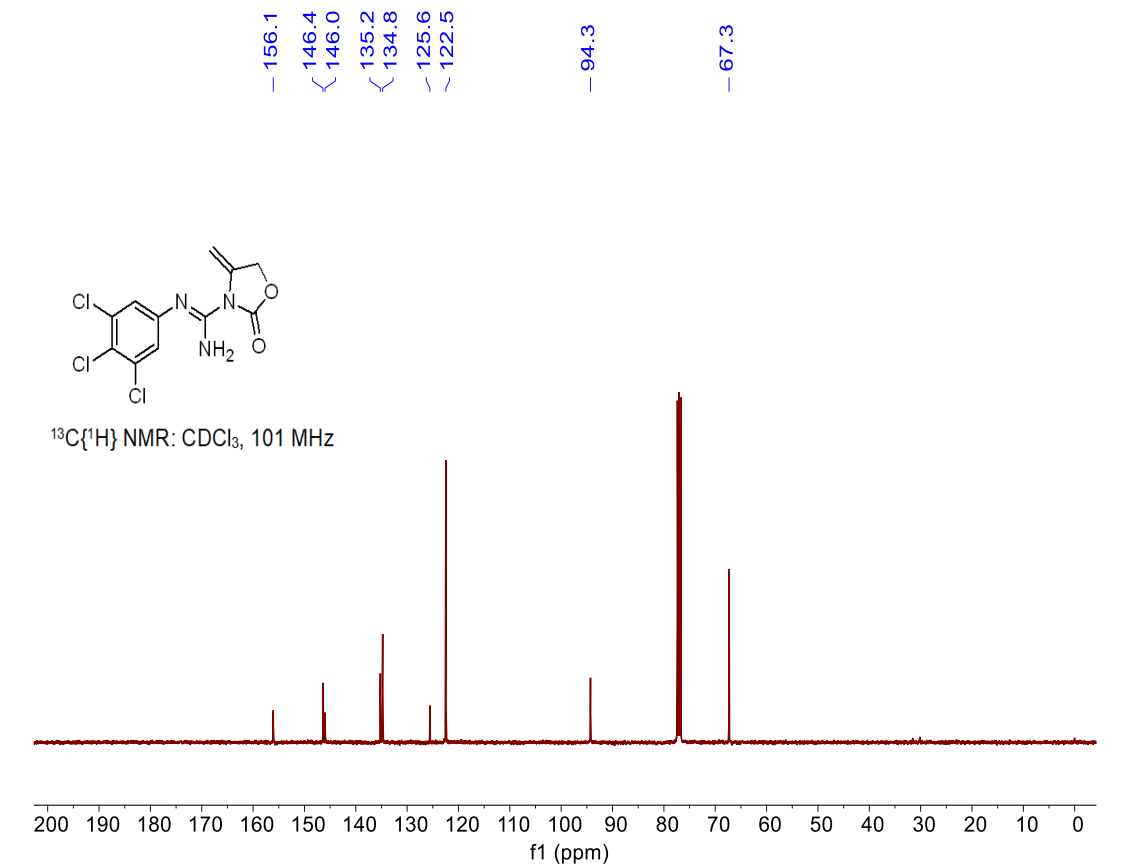

7.50  
7.49  
7.49  
7.40  
7.39  
7.38  
7.36  
7.36  
7.35  
7.13  
7.11  
7.09  
6.95  
6.95  
6.95  
6.93  
6.92  
5.96

4.98  
4.97

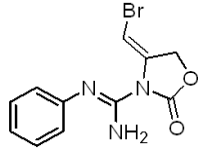

$^1\text{H NMR}$ :  $\text{CDCl}_3$ , 400 MHz

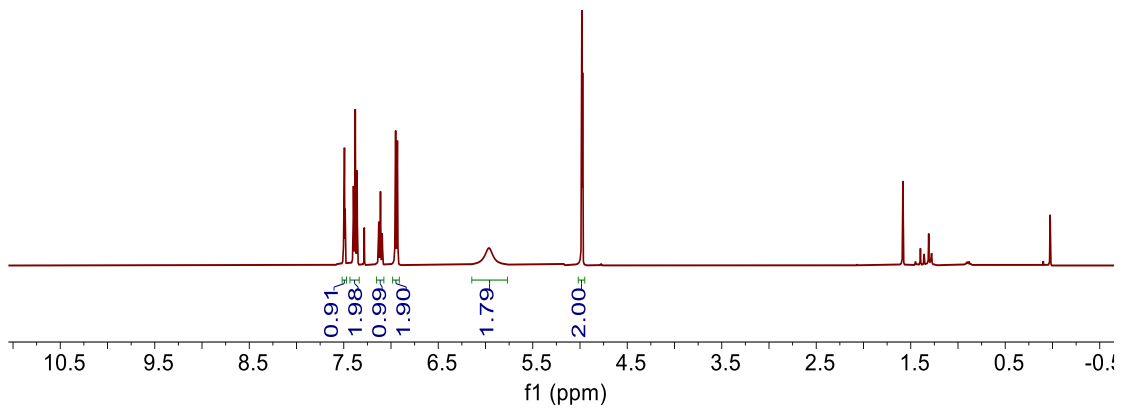

156.1  
146.3  
145.0  
132.3  
129.8  
123.7  
121.8  
90.8  
68.1

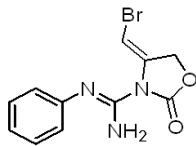

$^{13}\text{C}\{^1\text{H}\}$  NMR:  $\text{CDCl}_3$ , 101 MHz

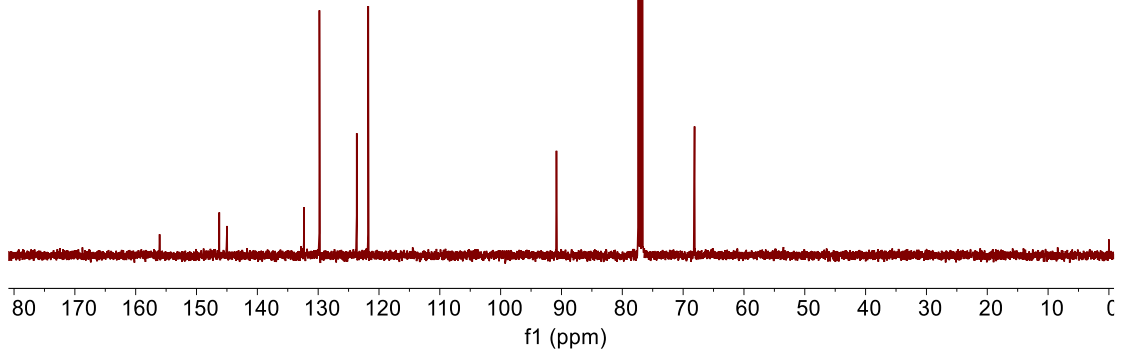

7.45  
7.44  
7.43  
7.07  
7.06  
7.05  
7.04  
7.04  
7.03  
7.02  
7.02  
6.89  
6.88  
6.88  
6.87  
6.86  
6.86  
6.85  
6.85  
4.96  
4.95

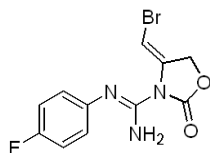

$^1\text{H}$  NMR:  $\text{CDCl}_3$ , 400 MHz

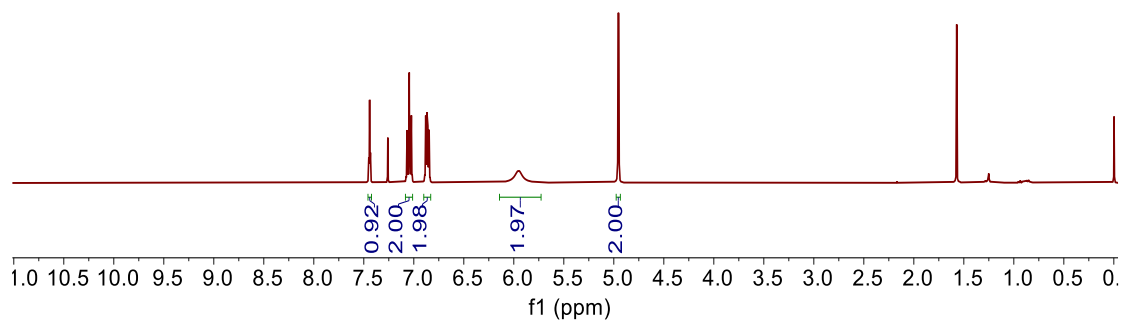

160.5  
158.1  
156.0  
145.5  
142.2  
142.2  
132.3  
123.0  
122.9  
116.6  
116.4  
90.9  
68.1

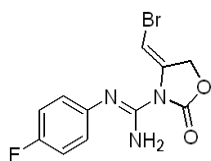

$^{13}\text{C}\{^1\text{H}\}$  NMR:  $\text{CDCl}_3$ , 101 MHz

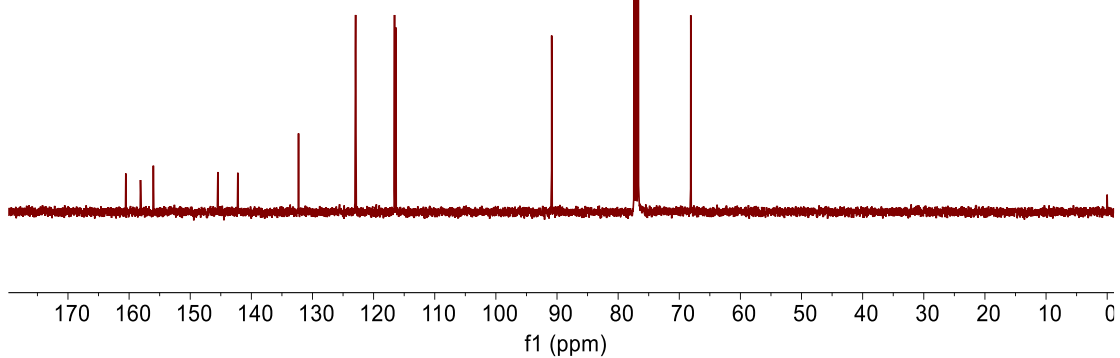

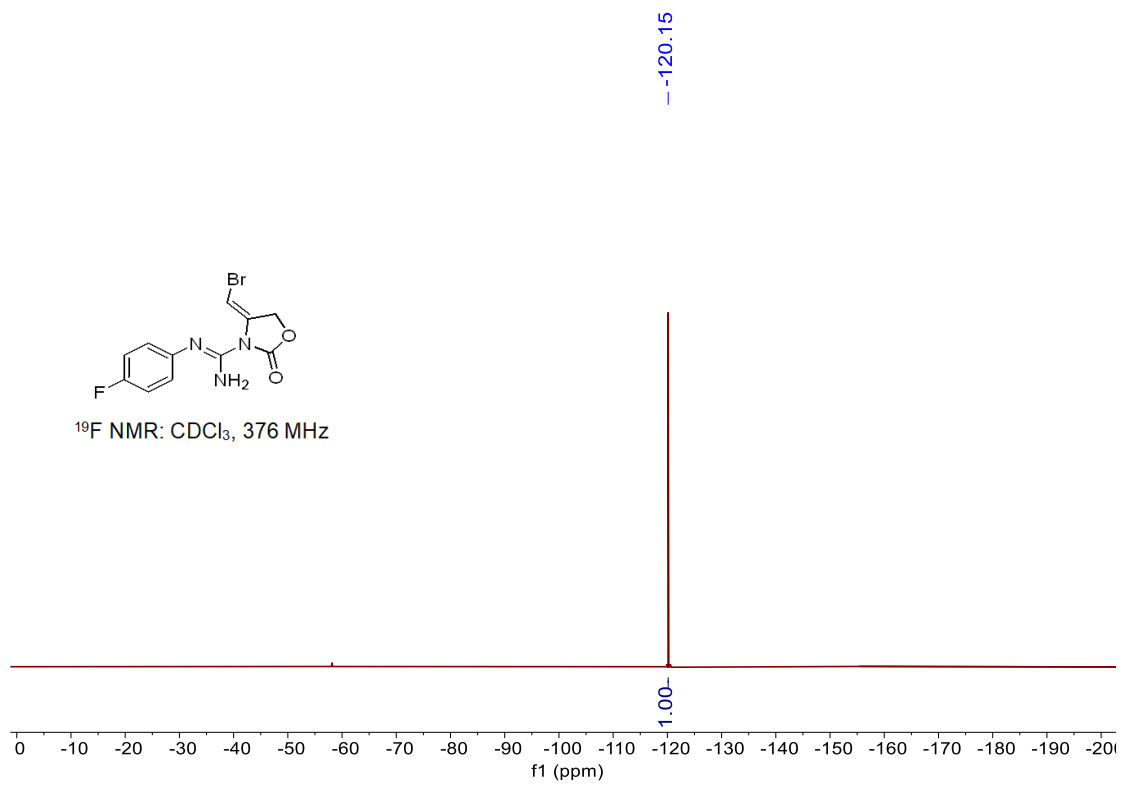

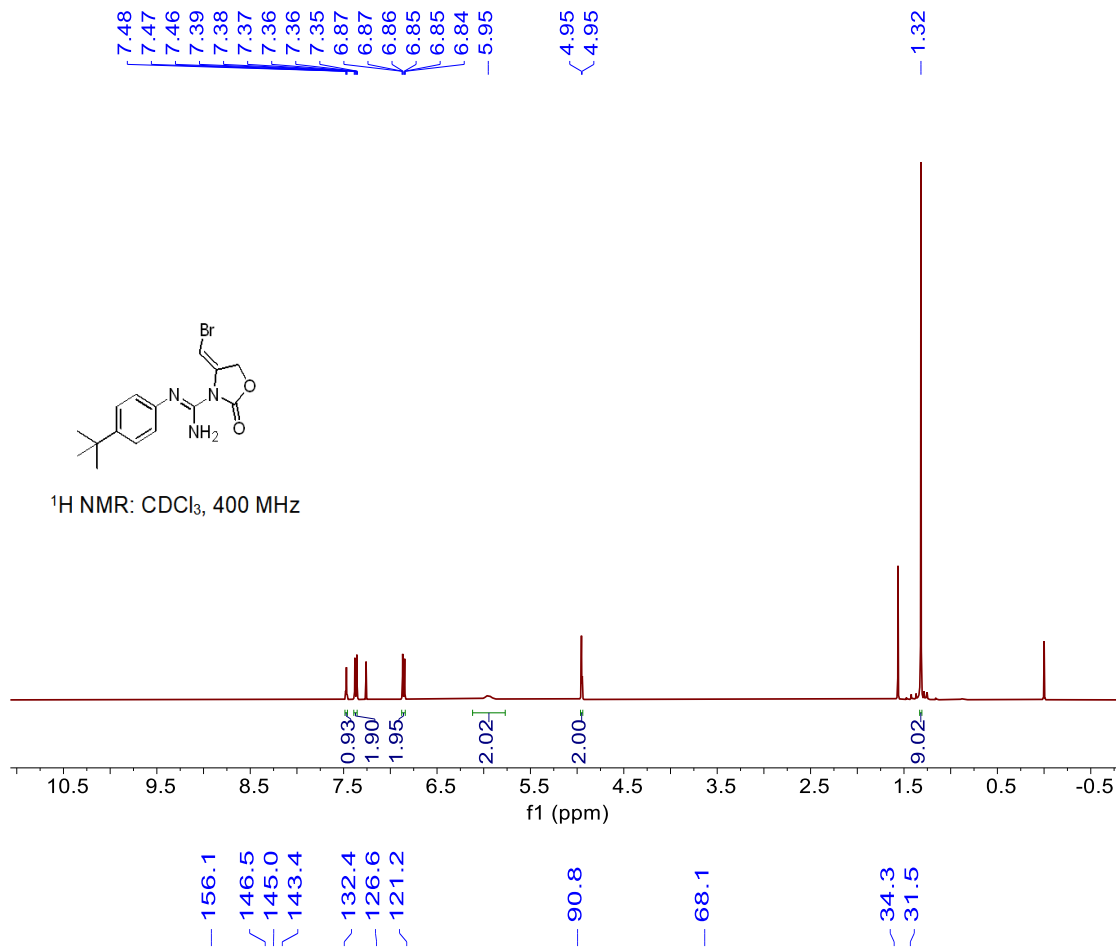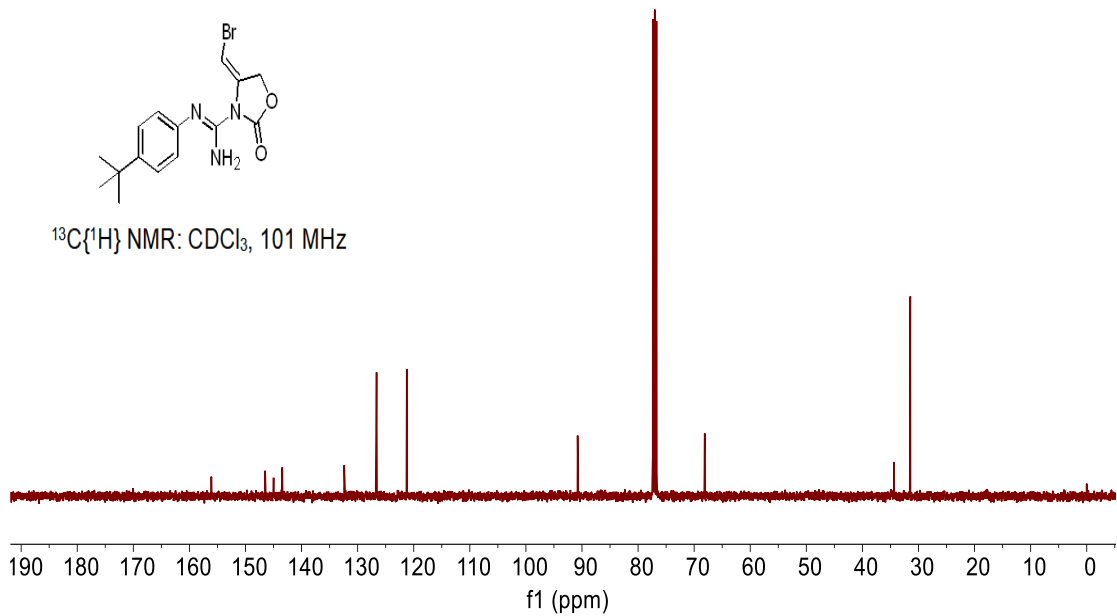

7.88  
7.88  
7.86  
7.86  
7.66  
7.66  
7.65  
7.35  
7.33  
7.32  
7.31  
7.31  
6.94  
6.93  
6.92  
6.91  
6.83  
6.83  
6.81  
6.81  
4.98  
4.97

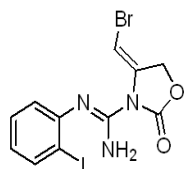

<sup>1</sup>H NMR: CDCl<sub>3</sub>, 400 MHz

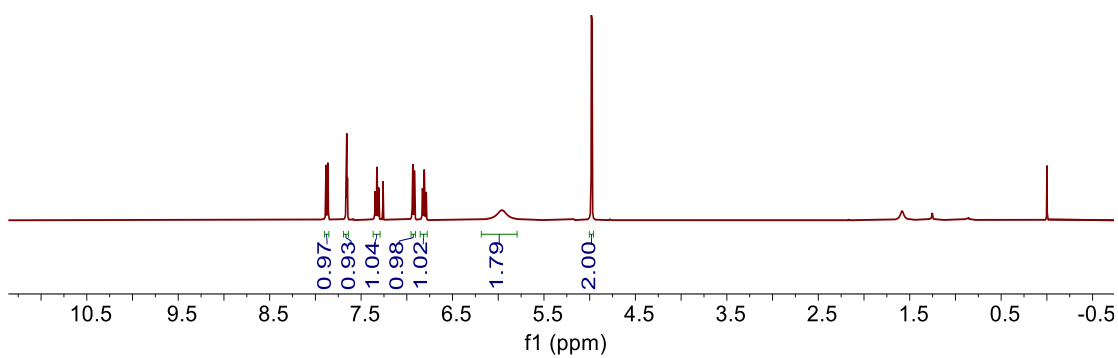

156.0  
148.0  
145.1  
139.8  
131.9  
129.7  
125.3  
121.6  
93.3  
91.7  
68.2

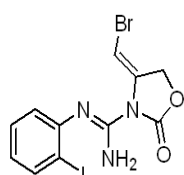

<sup>13</sup>C{<sup>1</sup>H} NMR: CDCl<sub>3</sub>, 101 MHz

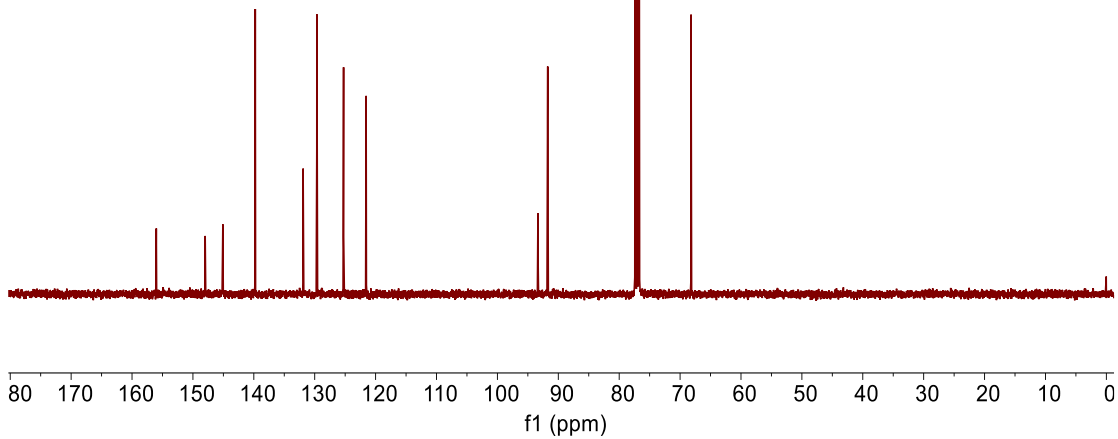



7.29  
7.28  
7.28  
7.26  
7.25  
7.24  
7.24  
7.20  
7.19  
7.18  
7.18  
7.17  
7.16  
7.16  
7.13  
7.12  
7.11  
7.10  
7.10  
7.04  
7.02  
7.01  
7.00  
7.00  
6.99  
6.87  
6.87  
6.85  
6.85  
6.80  
6.79  
6.79  
5.99  
4.82  
4.81

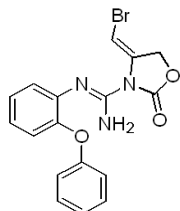

$^1\text{H NMR}$ :  $\text{CDCl}_3$ , 400 MHz

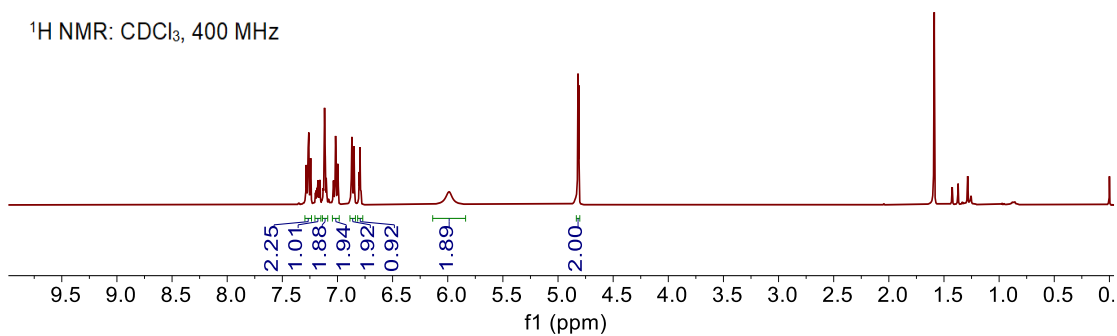

157.8  
155.9  
147.3  
144.6  
138.1  
131.6  
129.5  
125.5  
124.9  
123.7  
122.6  
122.3  
116.6

90.8

68.0

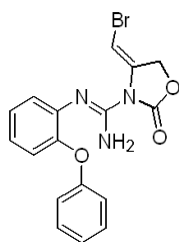

$^{13}\text{C}\{^1\text{H}\}$  NMR:  $\text{CDCl}_3$ , 101 MHz

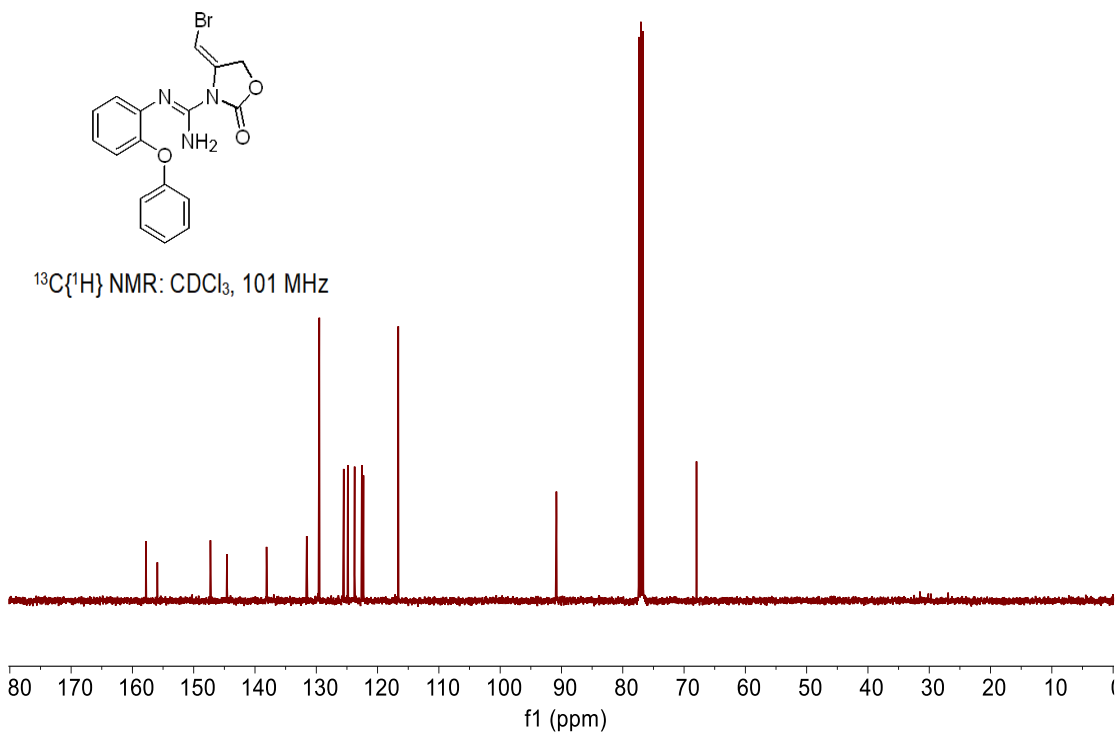

7.41  
7.40  
7.39  
7.37  
7.37  
7.36  
7.35  
7.34  
7.34  
7.11  
7.09  
7.07  
6.94  
6.93  
6.92  
6.91  
5.91  
4.87  
4.86

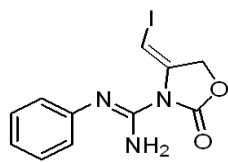

$^1\text{H NMR}$ :  $\text{CDCl}_3$ , 400 MHz

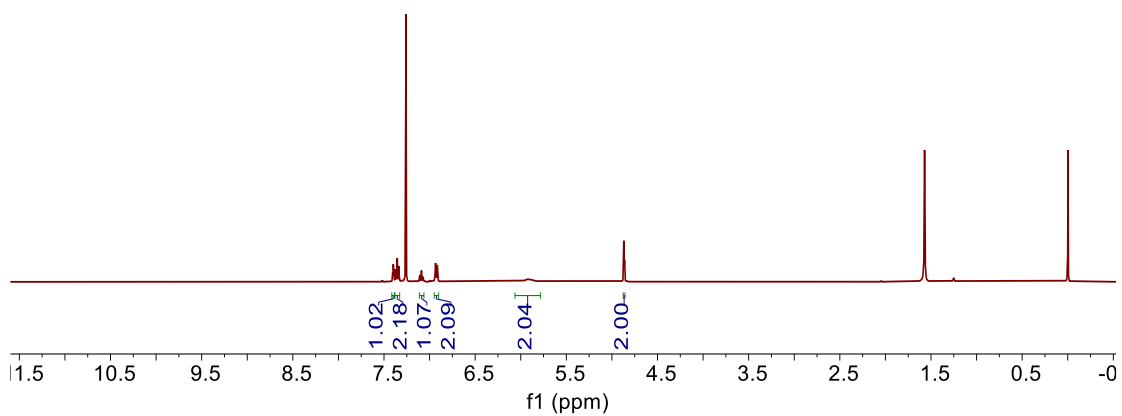

156.5  
146.3  
145.2  
134.6  
129.8  
123.7  
121.8  
71.7  
60.7

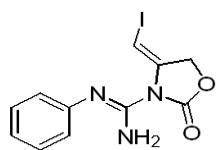

$^{13}\text{C}\{^1\text{H}\}$  NMR:  $\text{CDCl}_3$ , 101 MHz

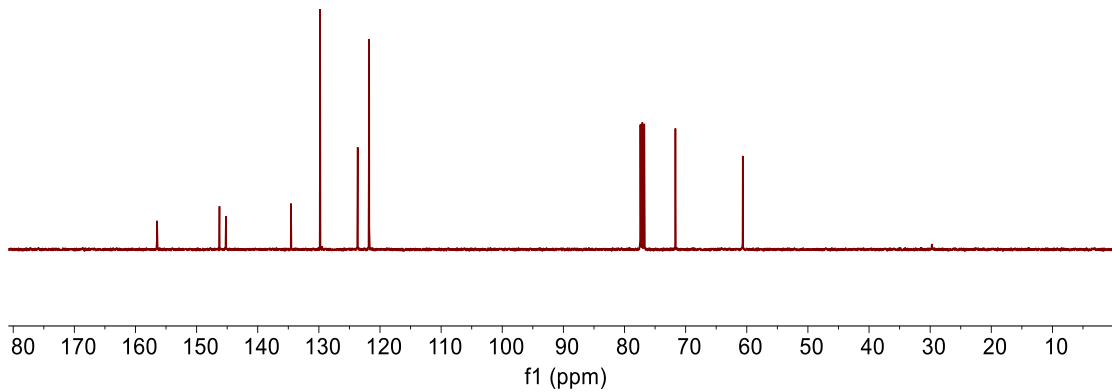

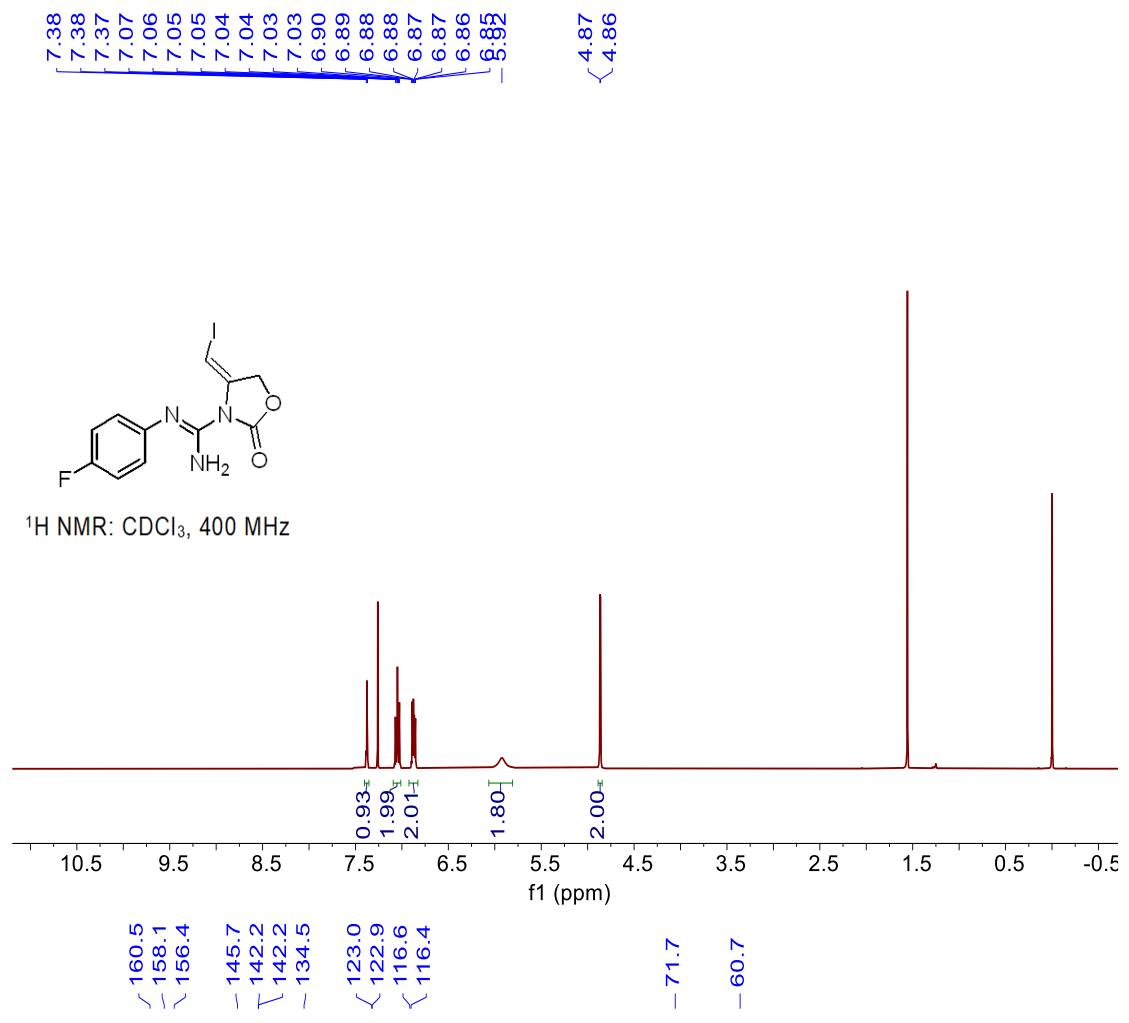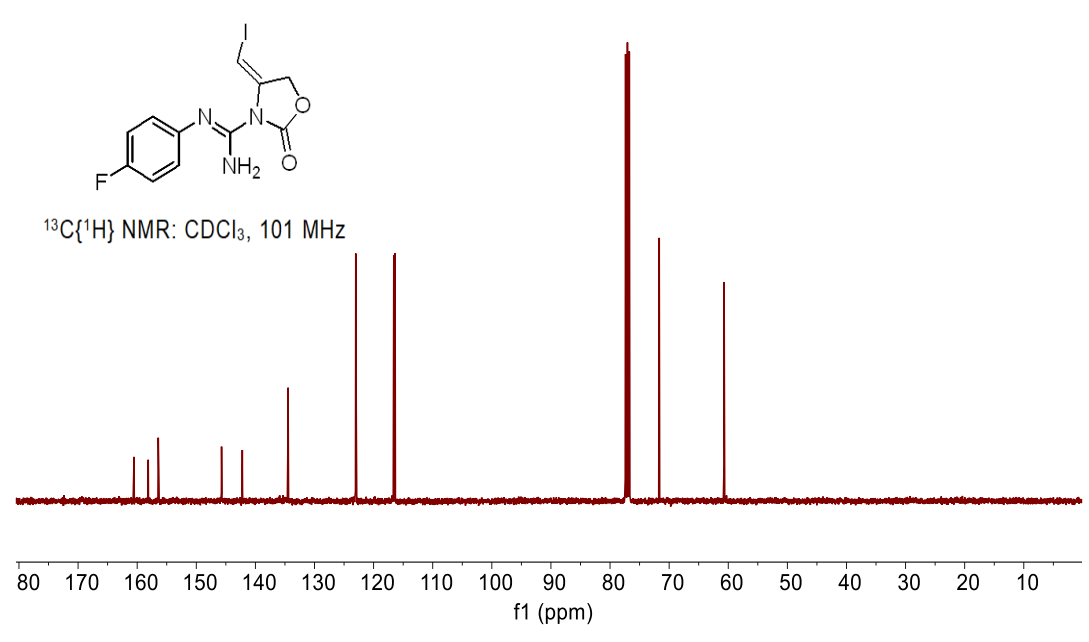

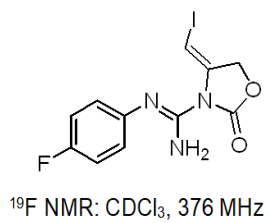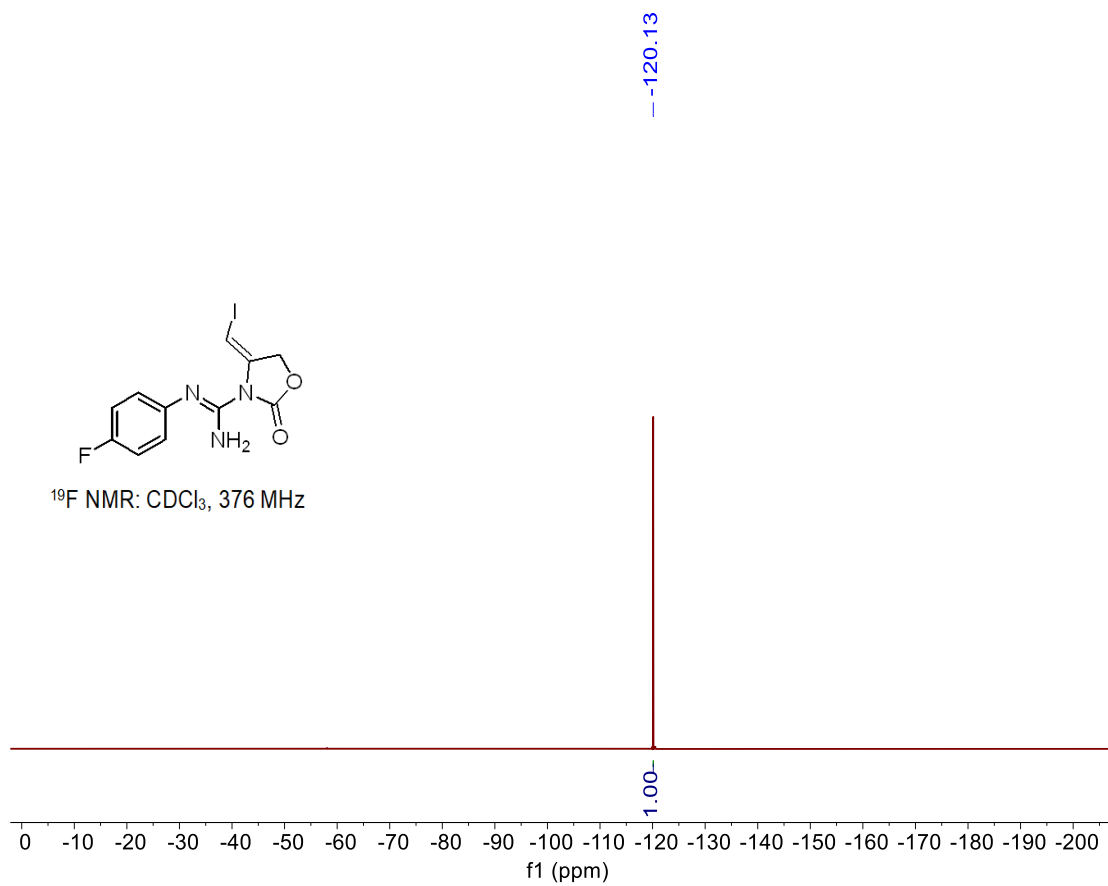

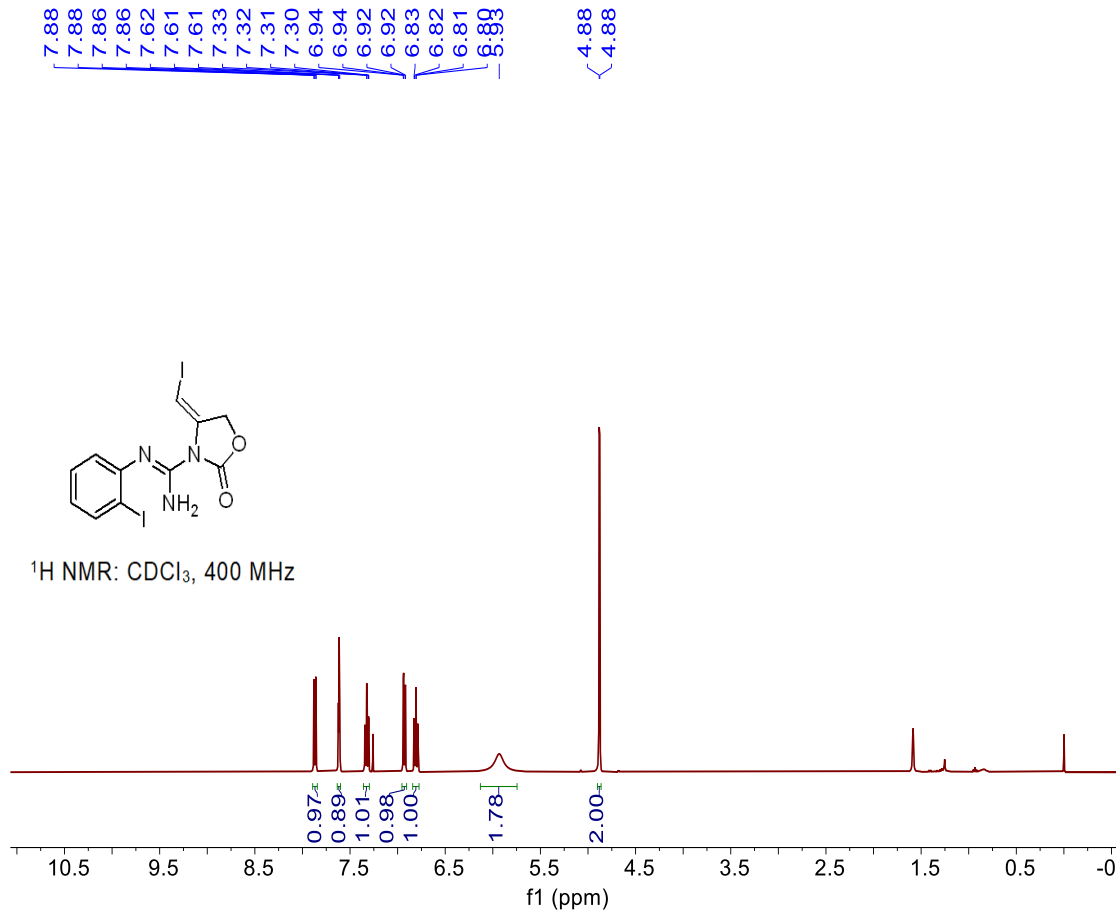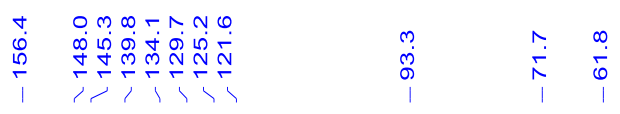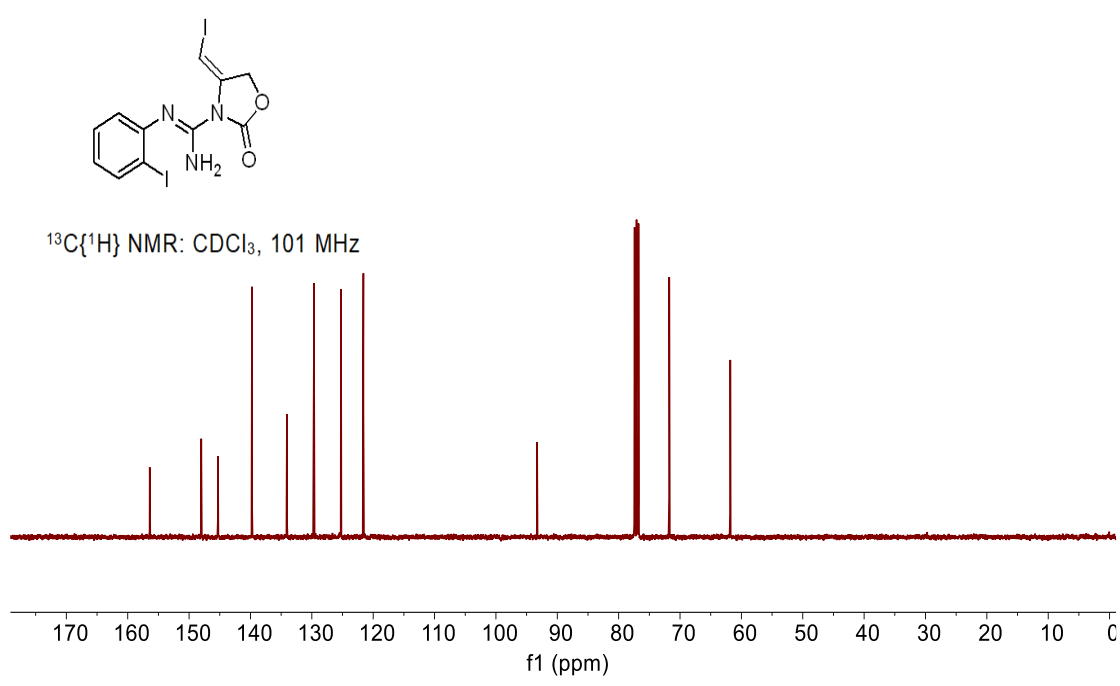

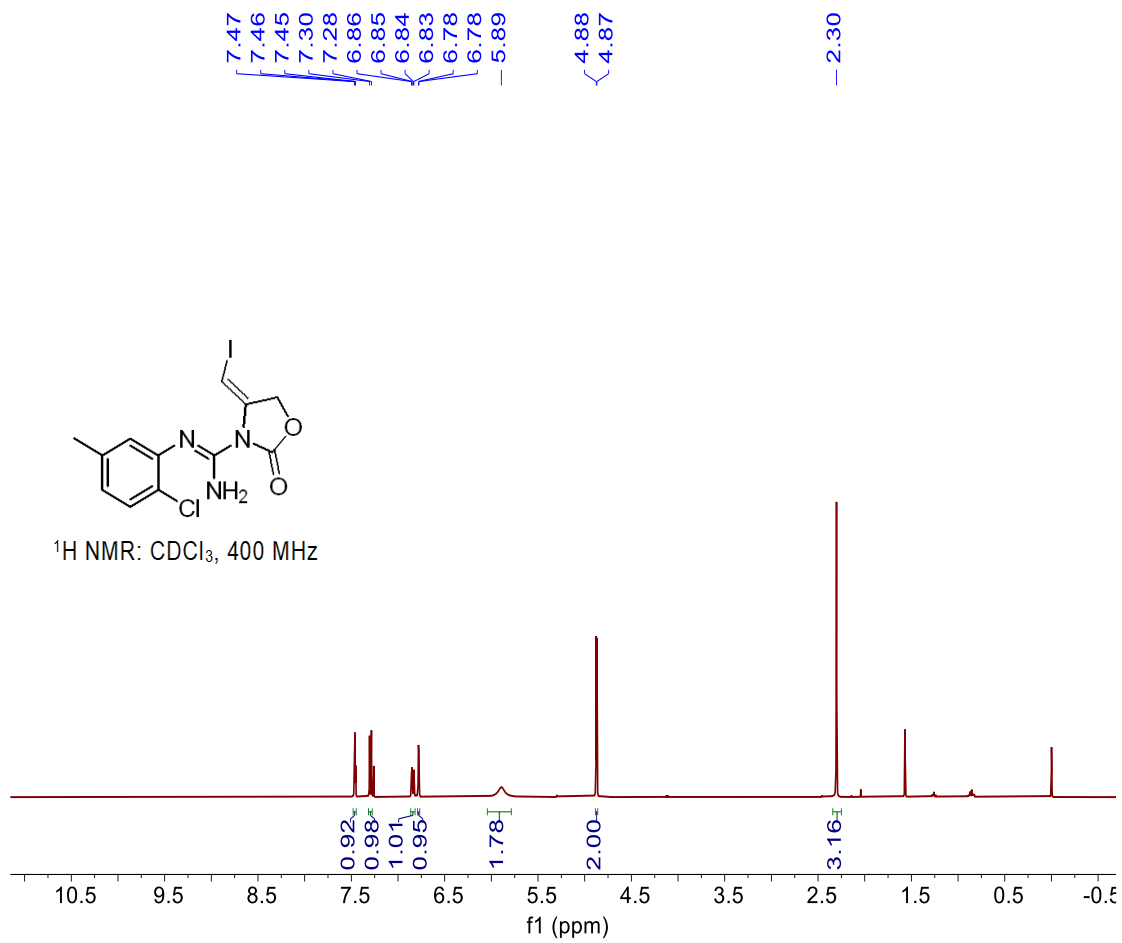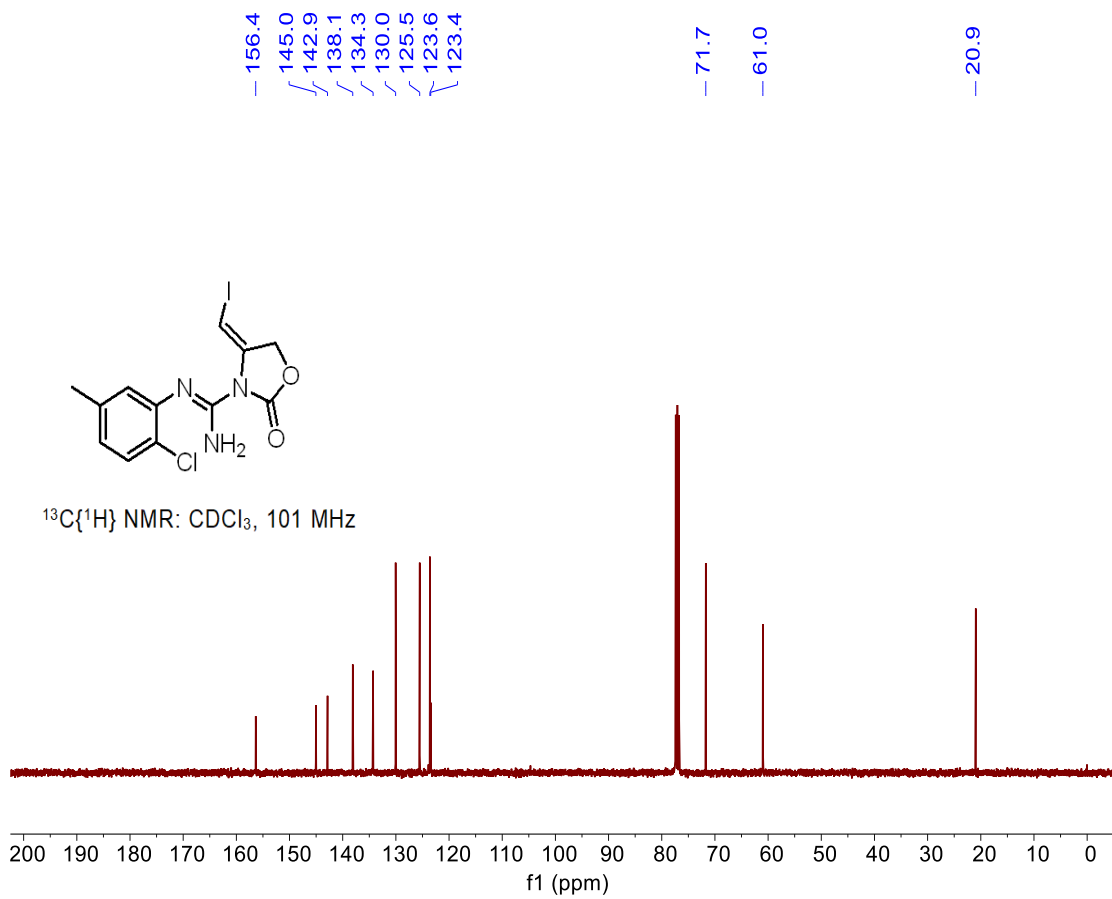

7.30  
7.30  
7.29  
6.98  
— 6.08  
4.87  
4.86

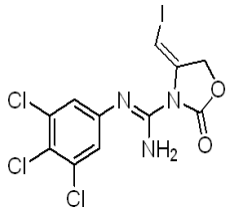

$^1\text{H}$  NMR:  $\text{CDCl}_3$ , 400 MHz

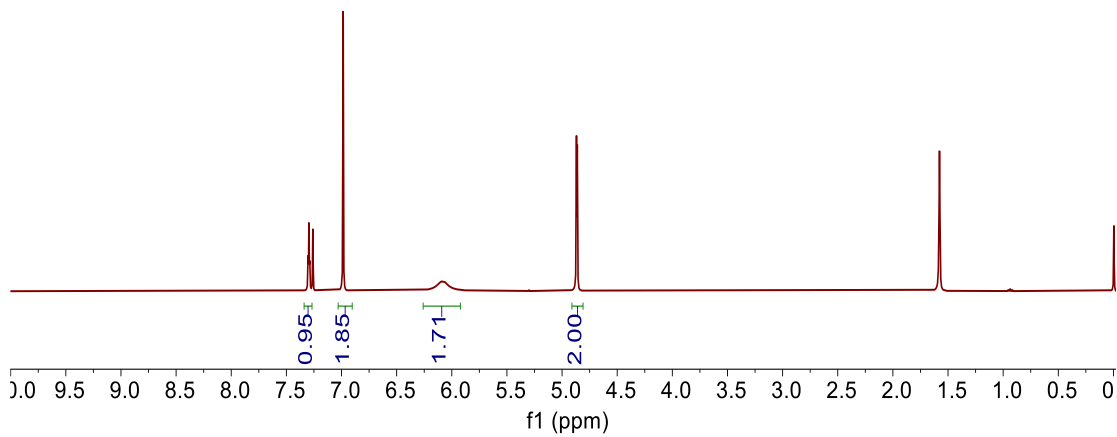

156.3  
146.0  
145.7  
134.9  
134.0  
125.9  
122.5  
— 71.7  
— 61.1

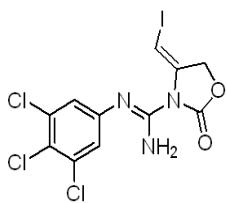

$^{13}\text{C}\{^1\text{H}\}$  NMR:  $\text{CDCl}_3$ , 101 MHz

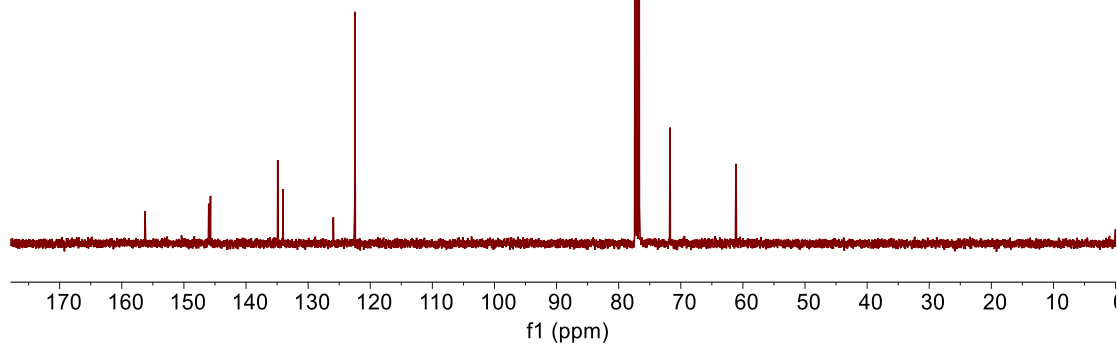

7.29  
7.29  
7.28  
7.27  
7.27  
7.25  
7.25  
7.24  
7.20  
7.20  
7.19  
7.18  
7.18  
7.17  
7.16  
7.14  
7.12  
7.12  
7.11  
7.10  
7.09  
7.08  
7.05  
7.05  
7.04  
7.03  
7.02  
7.01  
7.00  
6.88  
6.87  
6.87  
6.86  
6.85  
6.85  
6.85  
6.84  
6.73  
6.72  
6.72  
5.95  
4.72  
4.72

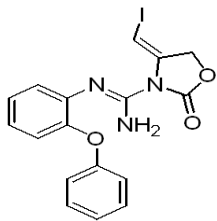

$^1\text{H NMR}$ :  $\text{CDCl}_3$ , 400 MHz

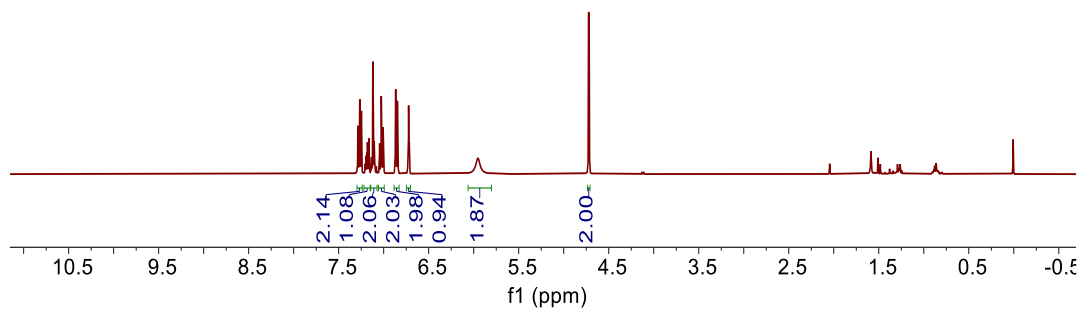

157.8  
156.3  
147.2  
144.8  
138.2  
133.7  
129.5  
125.6  
124.9  
123.8  
122.7  
122.4  
116.6  
- 71.5  
- 60.6

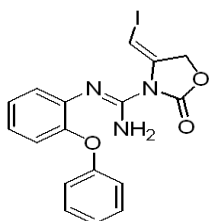

$^{13}\text{C}\{^1\text{H}\}$  NMR:  $\text{CDCl}_3$ , 101 MHz

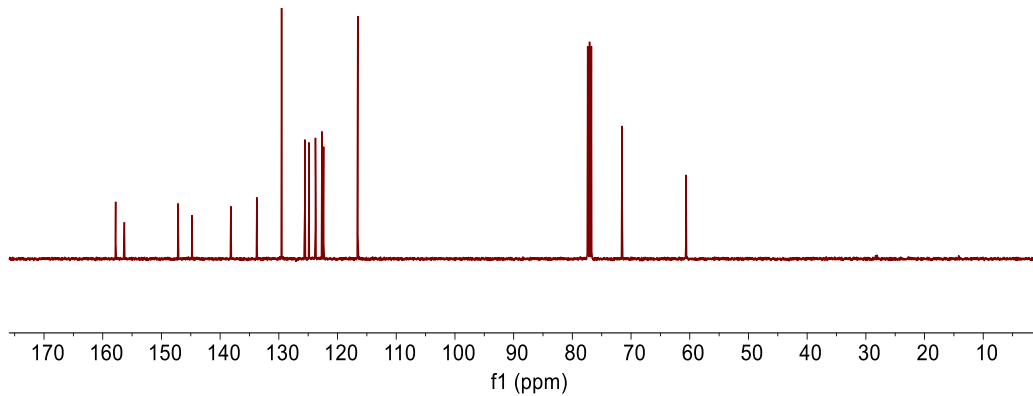



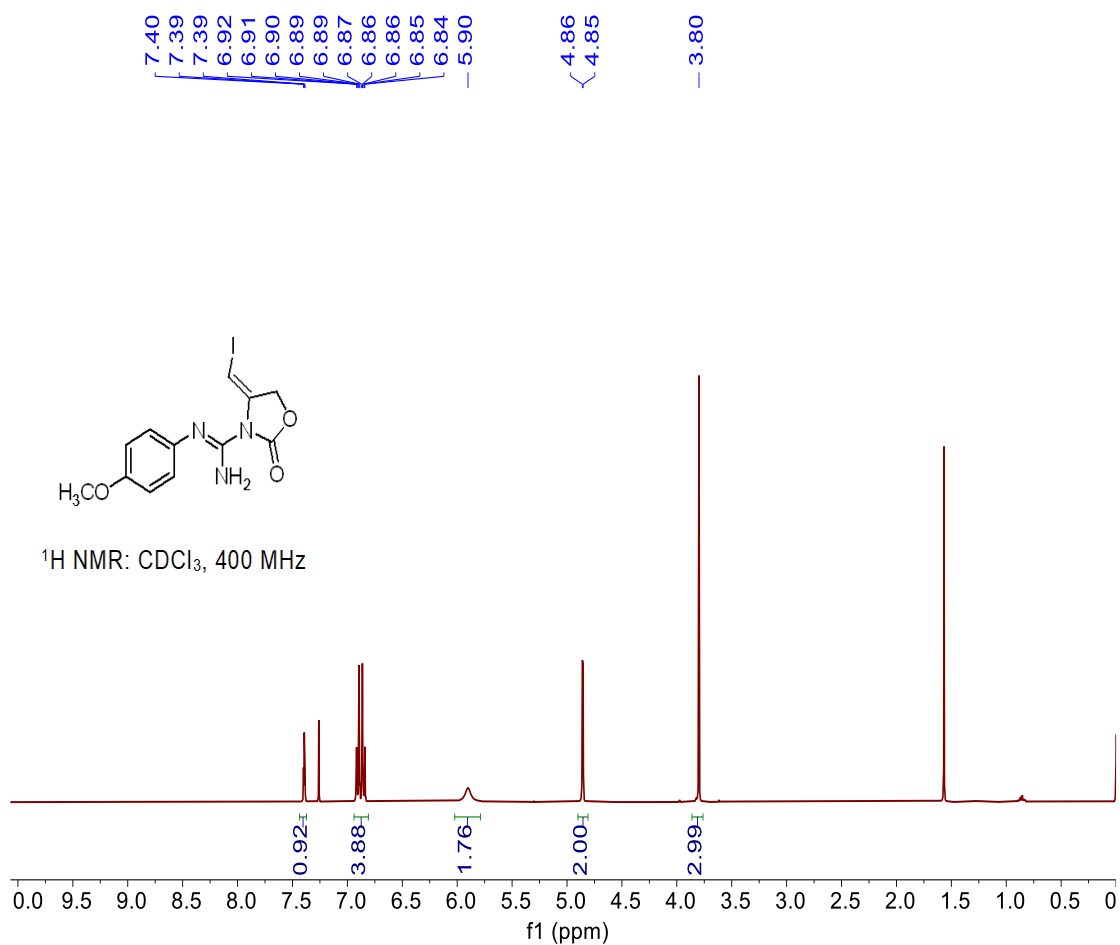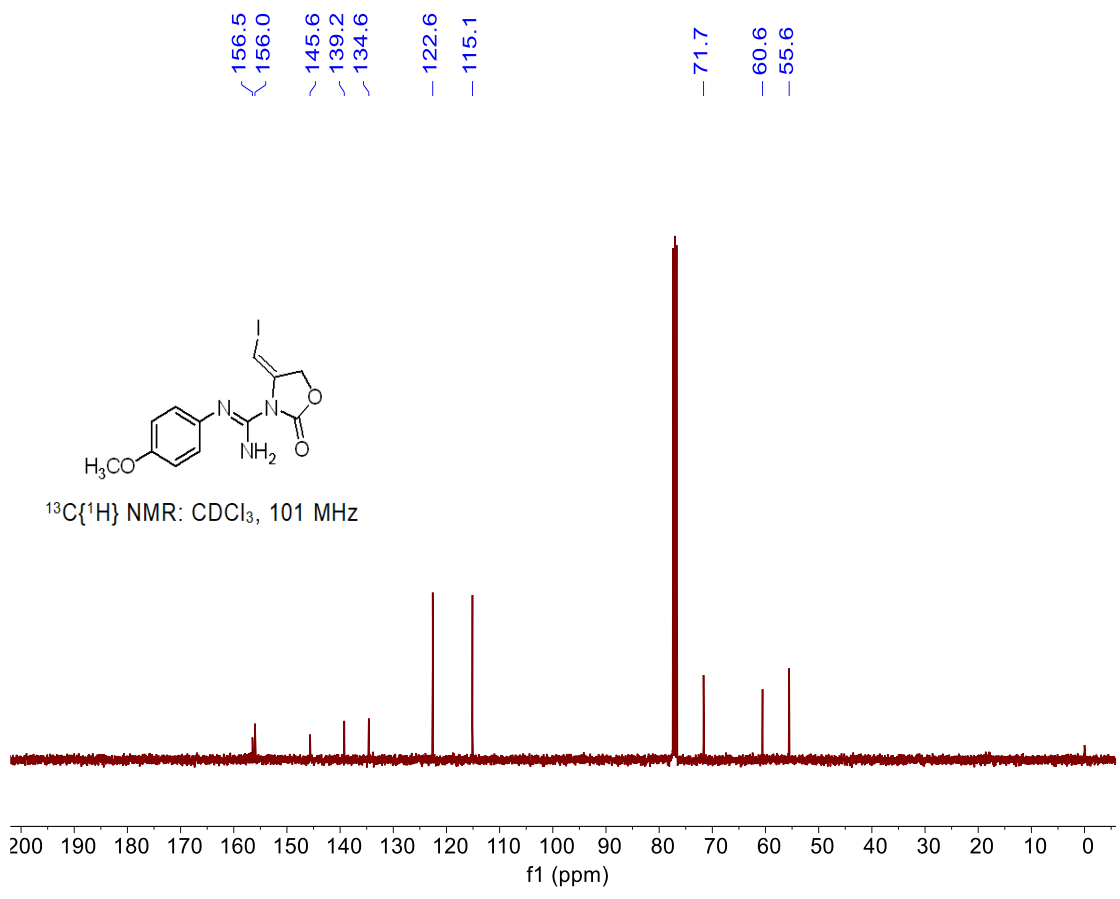

**Reference:**

[1] Tian, M.; Yan, M.; Baran, P. S. 11-Step total synthesis of Araiosamines. *J. Am. Chem. Soc.* 2016, *138*, 14234–14237.
